# Supplementary material for: Three Essential Ribonucleases—RNase Y, J1, and III—Control the Abundance of a Majority of Bacillus subtilis mRNAs
Source: PubMed Central journal article supplement (PMC3297567; doi:10.1371/journal.pgen.1002520), 2012-03-08
Supplement: pgen.1002520.s001.pdf [file pgen.1002520.s001.pdf]

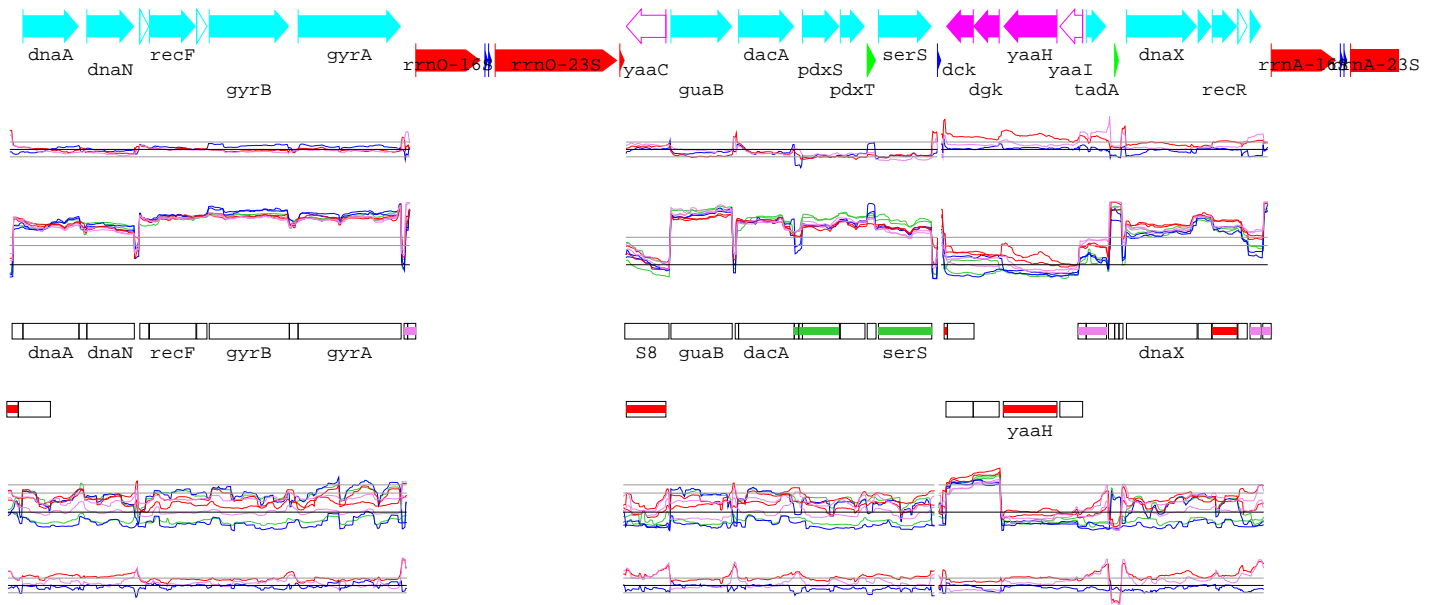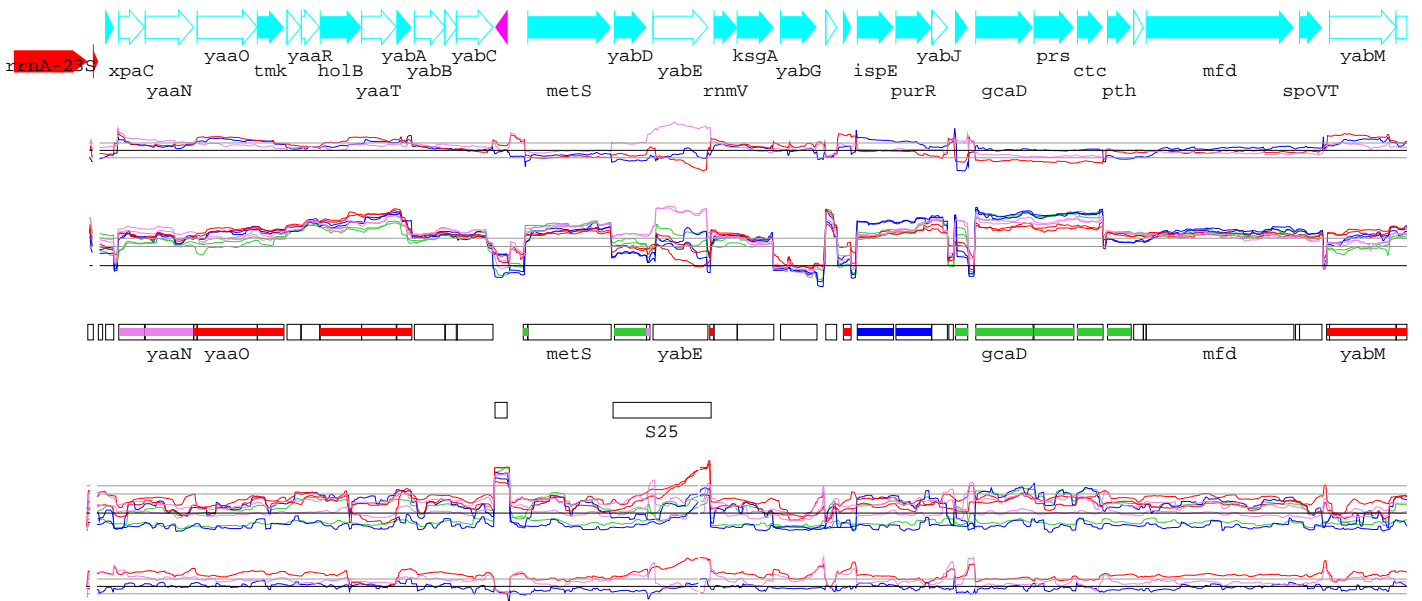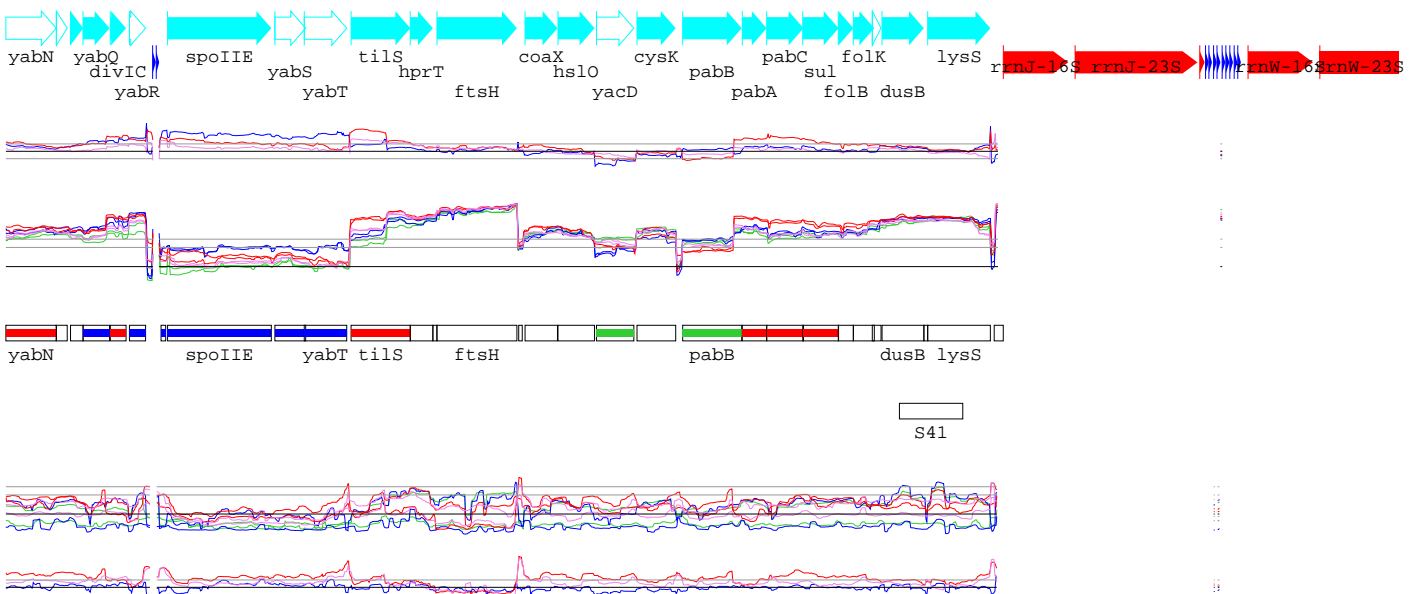

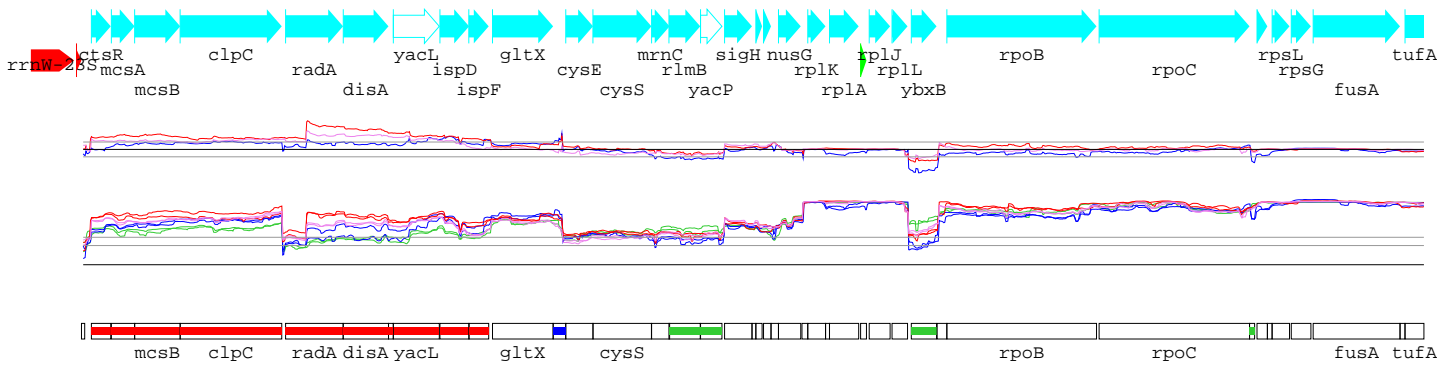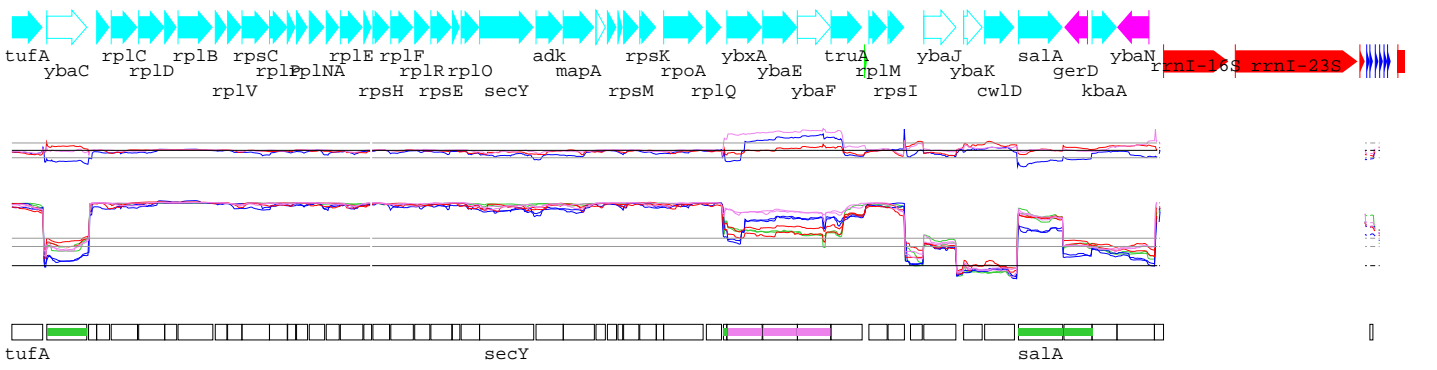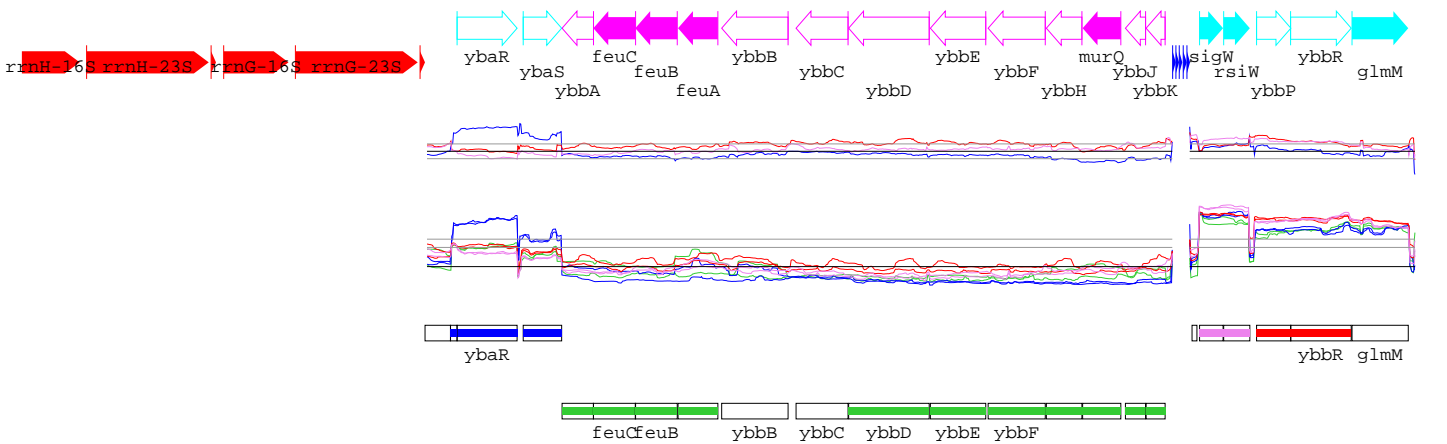

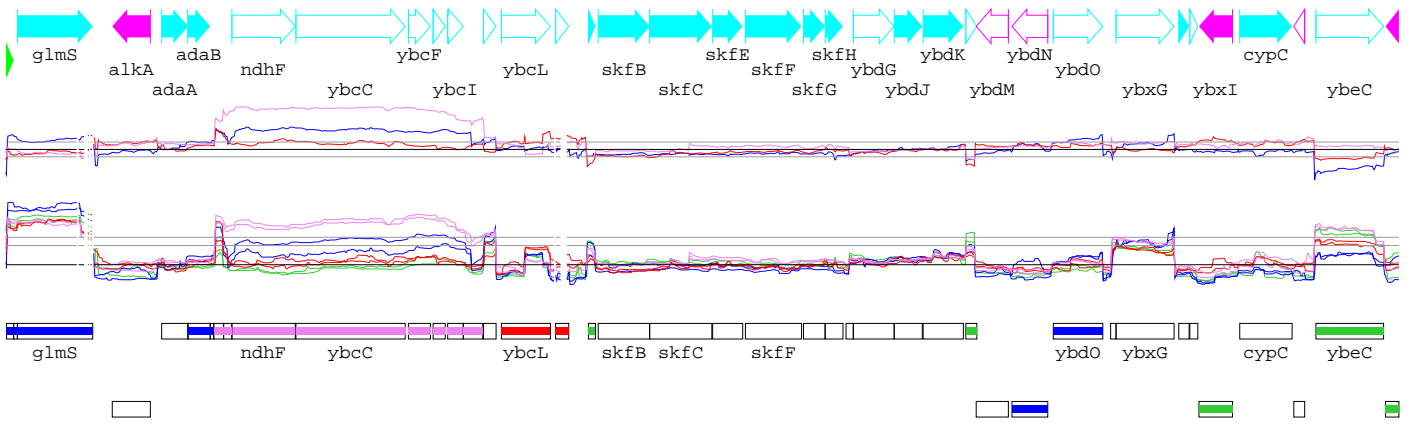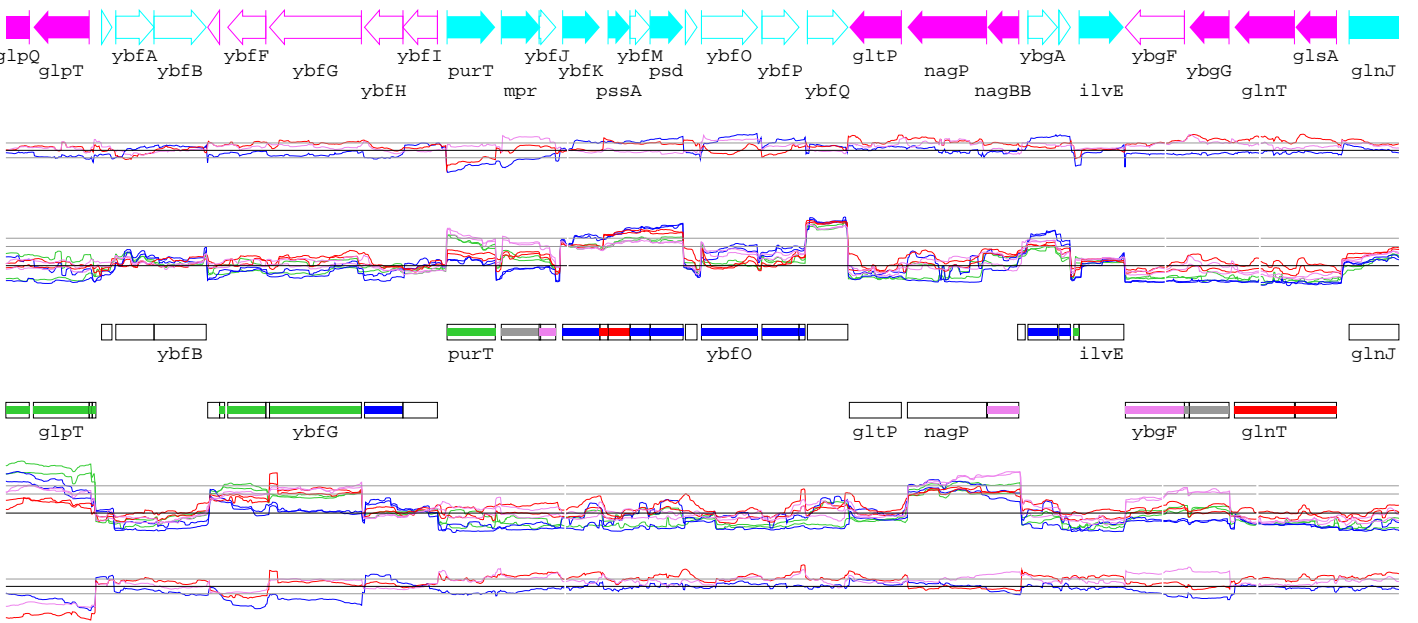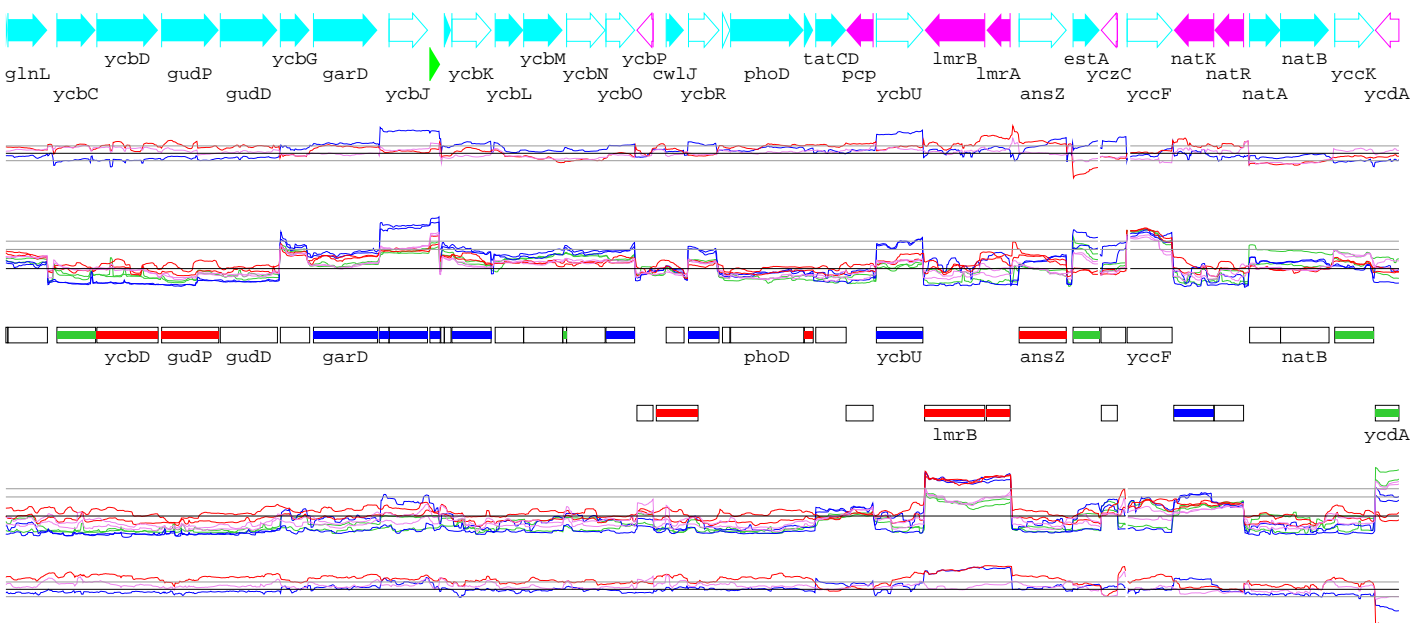

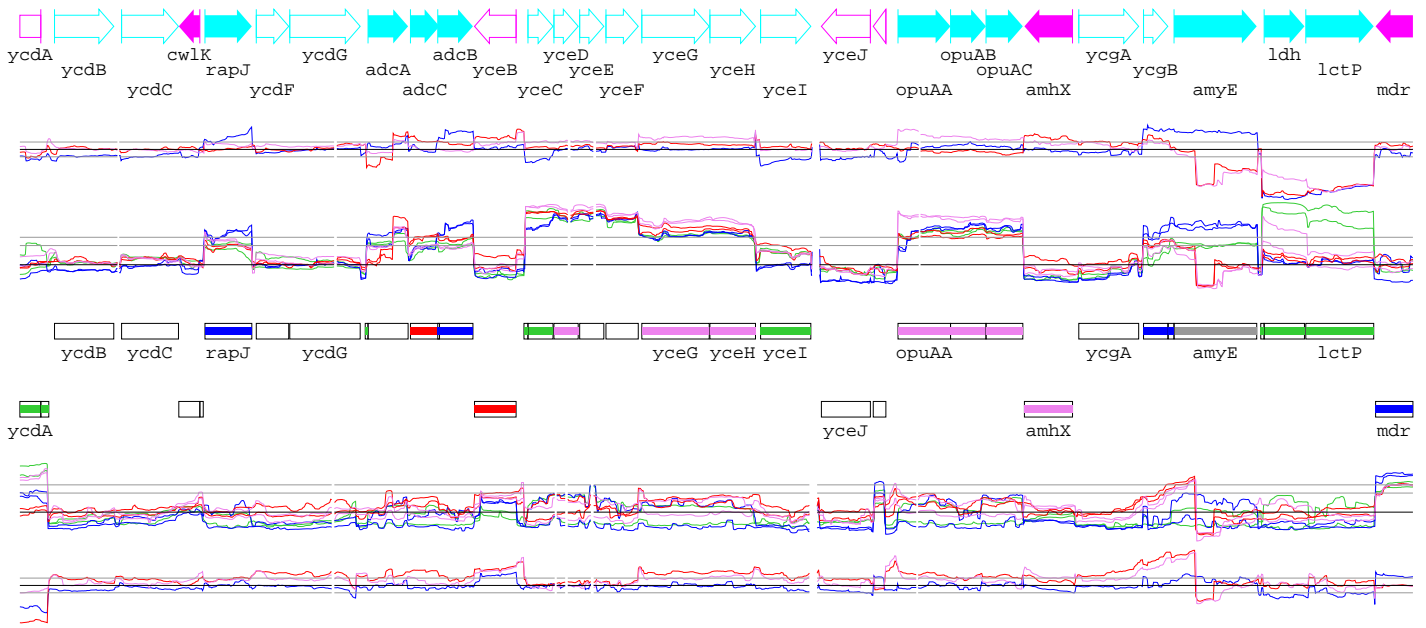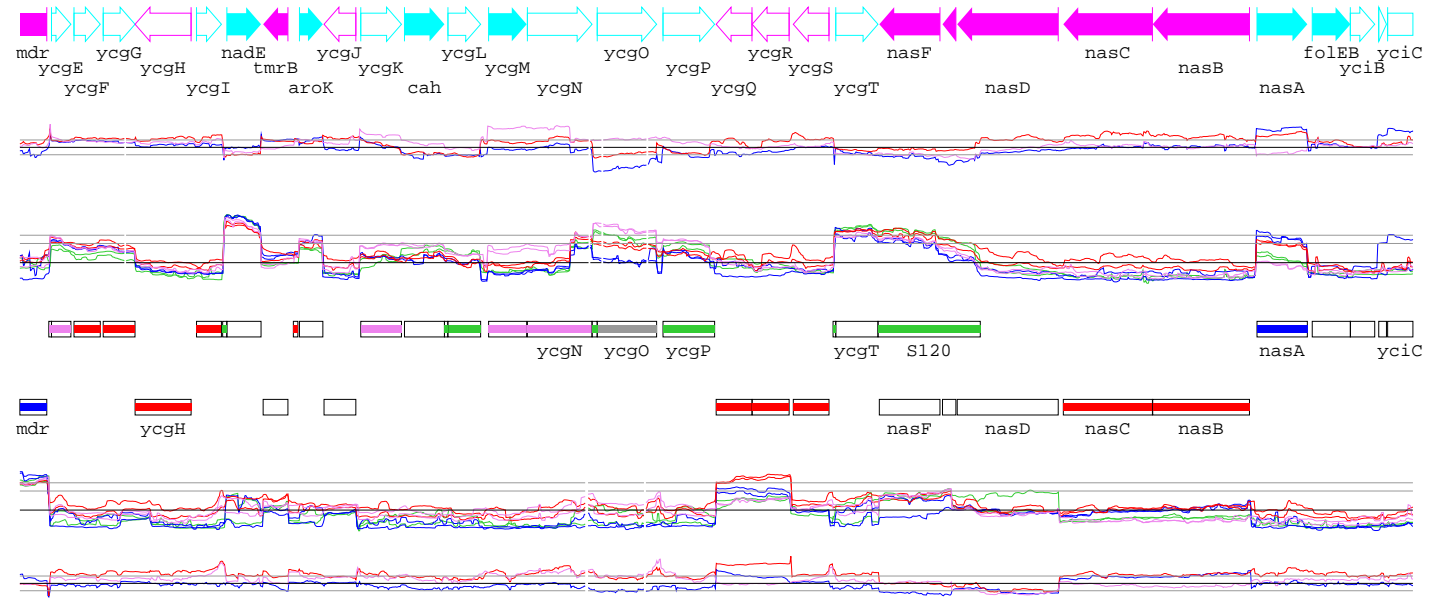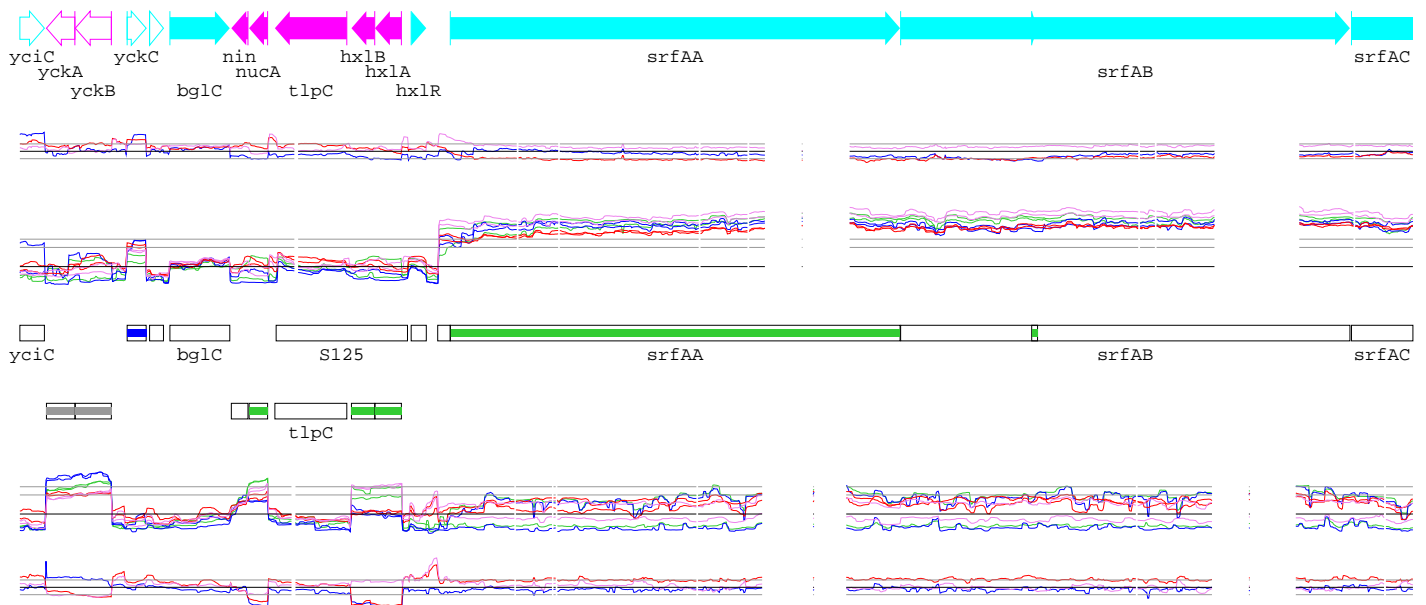

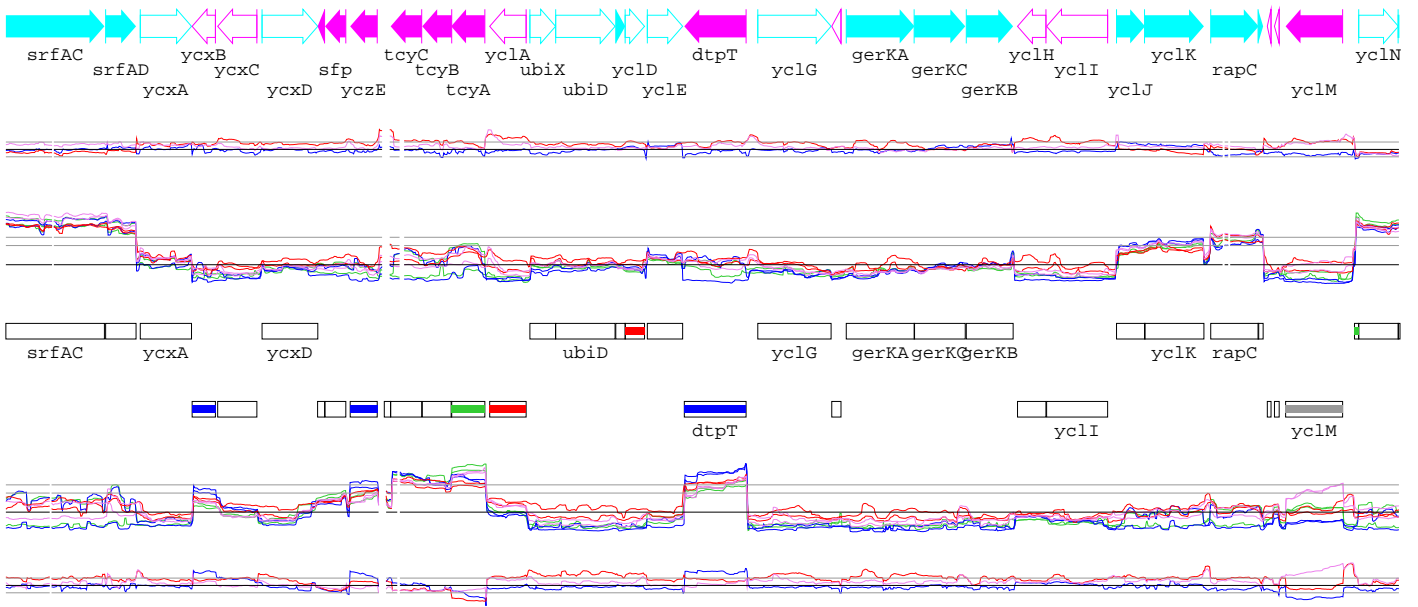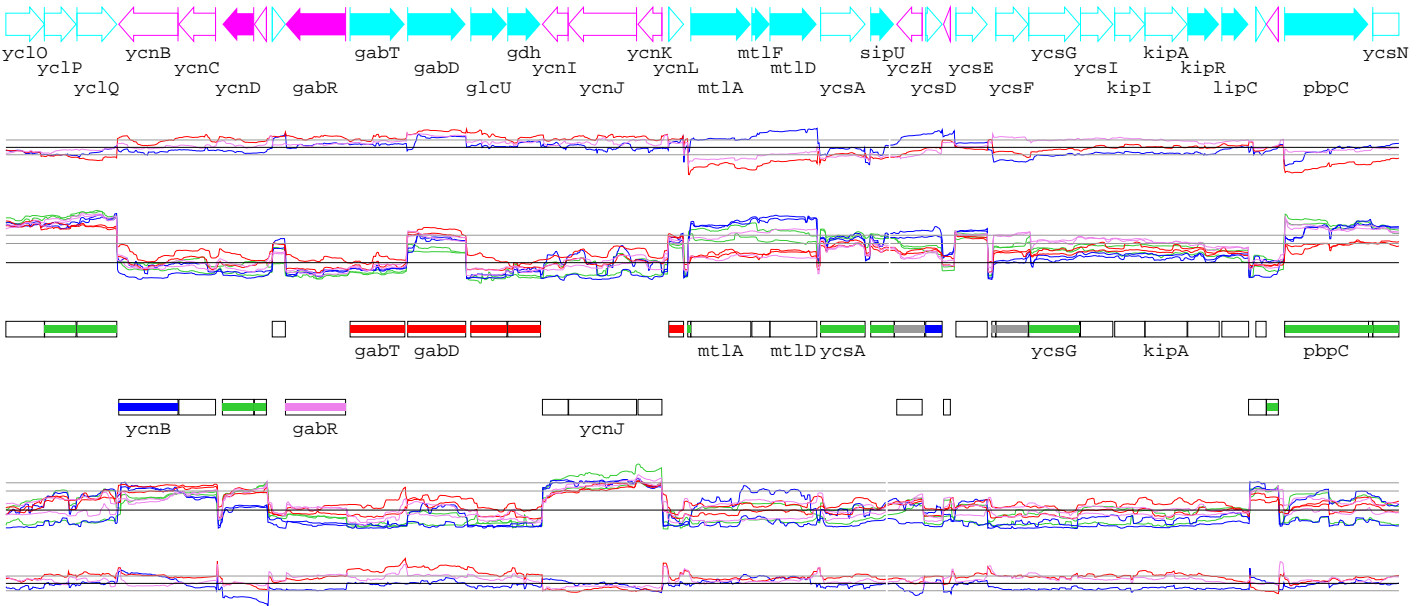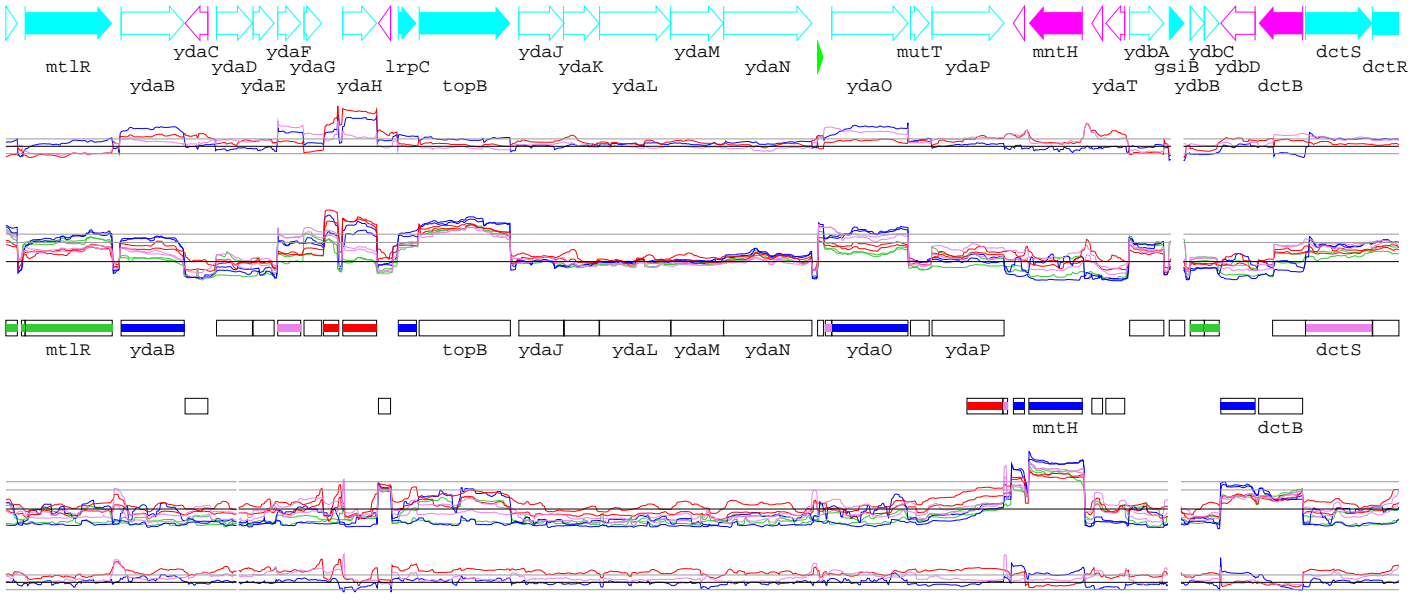

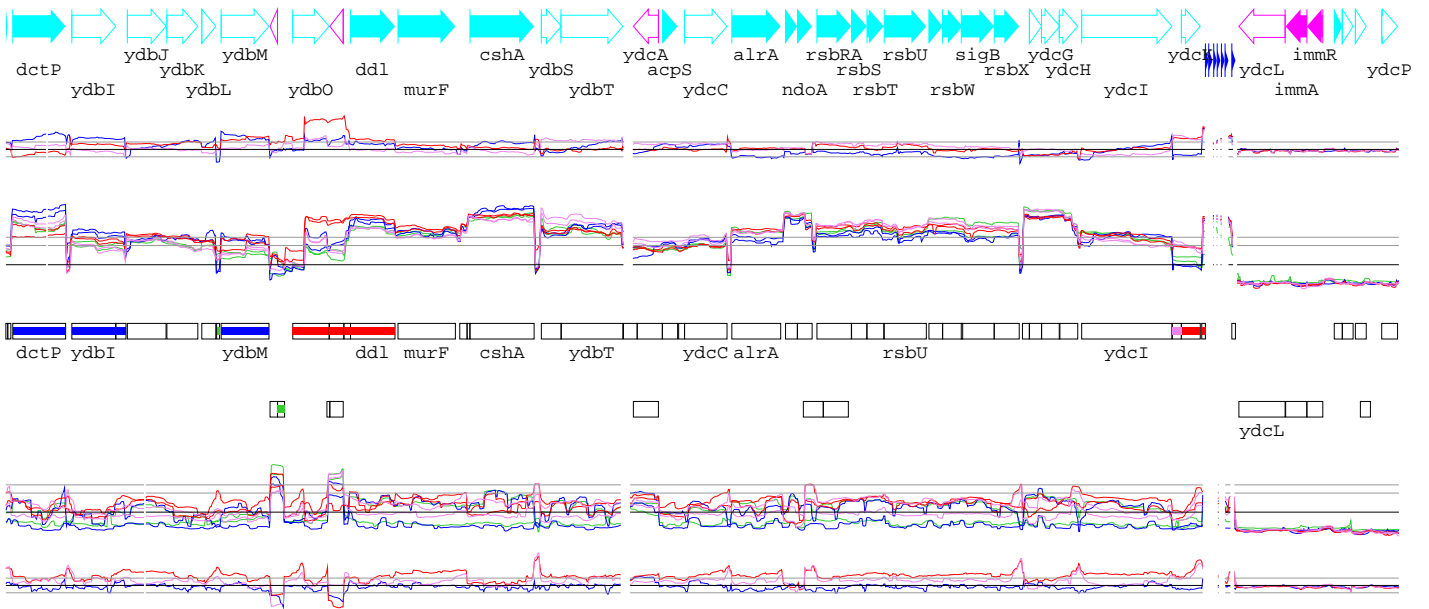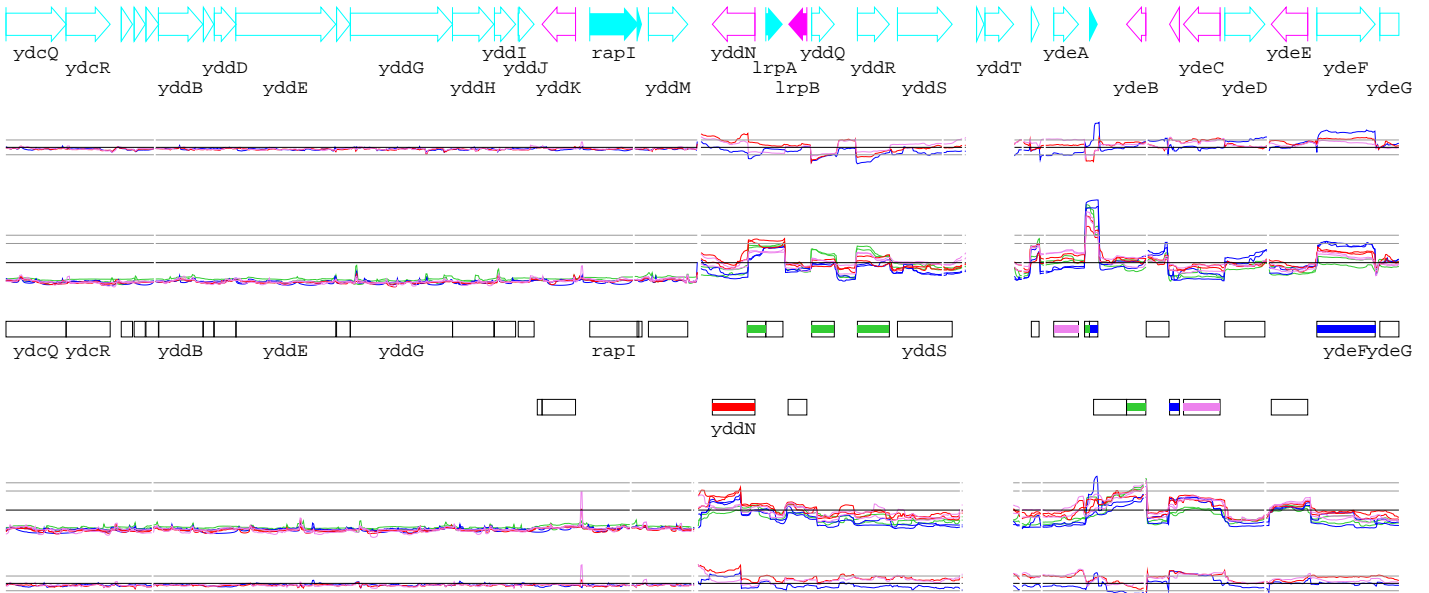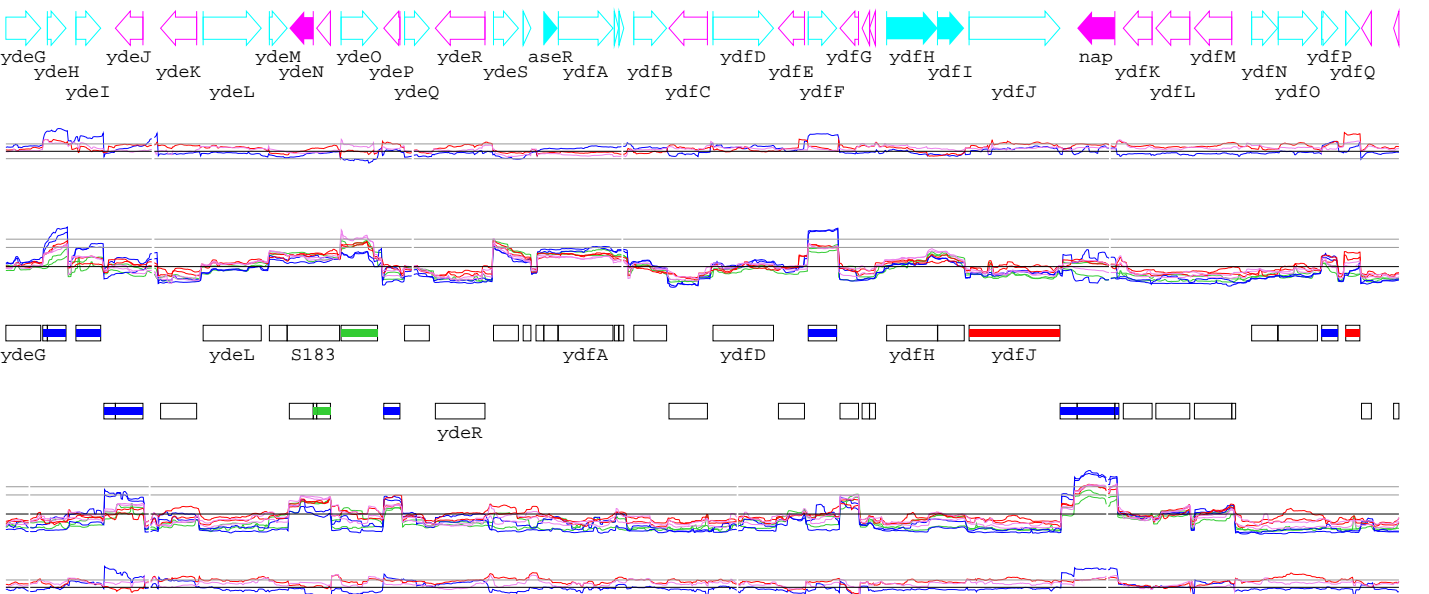

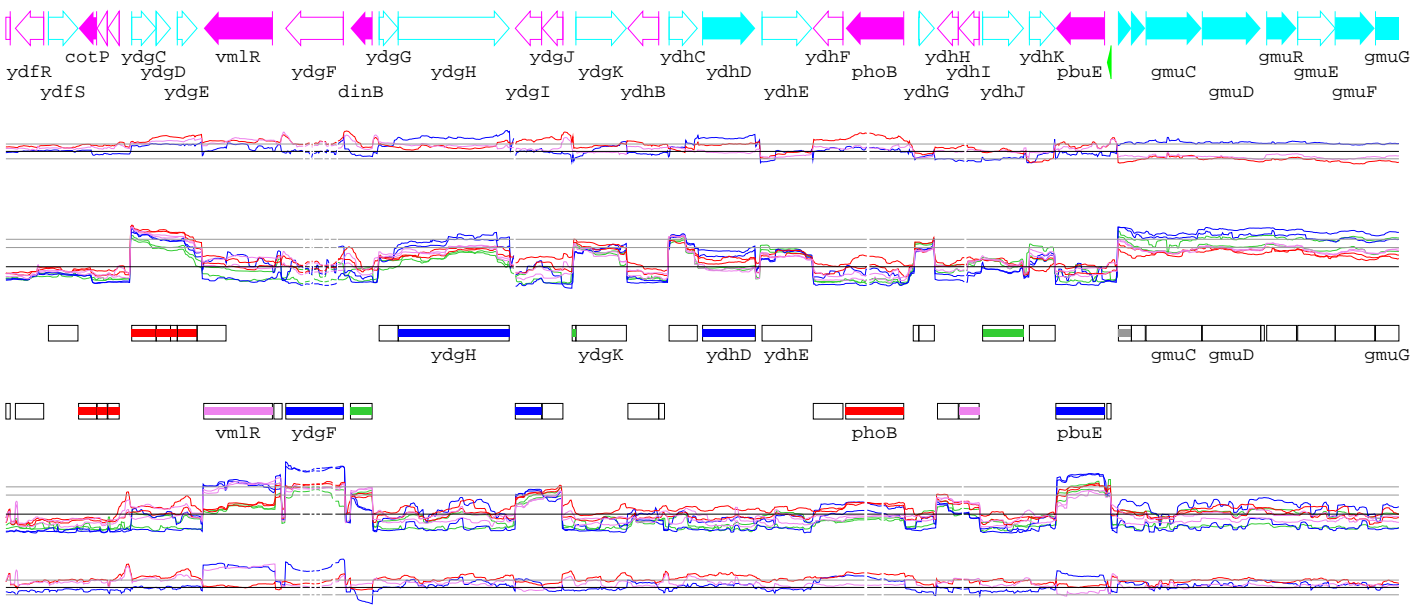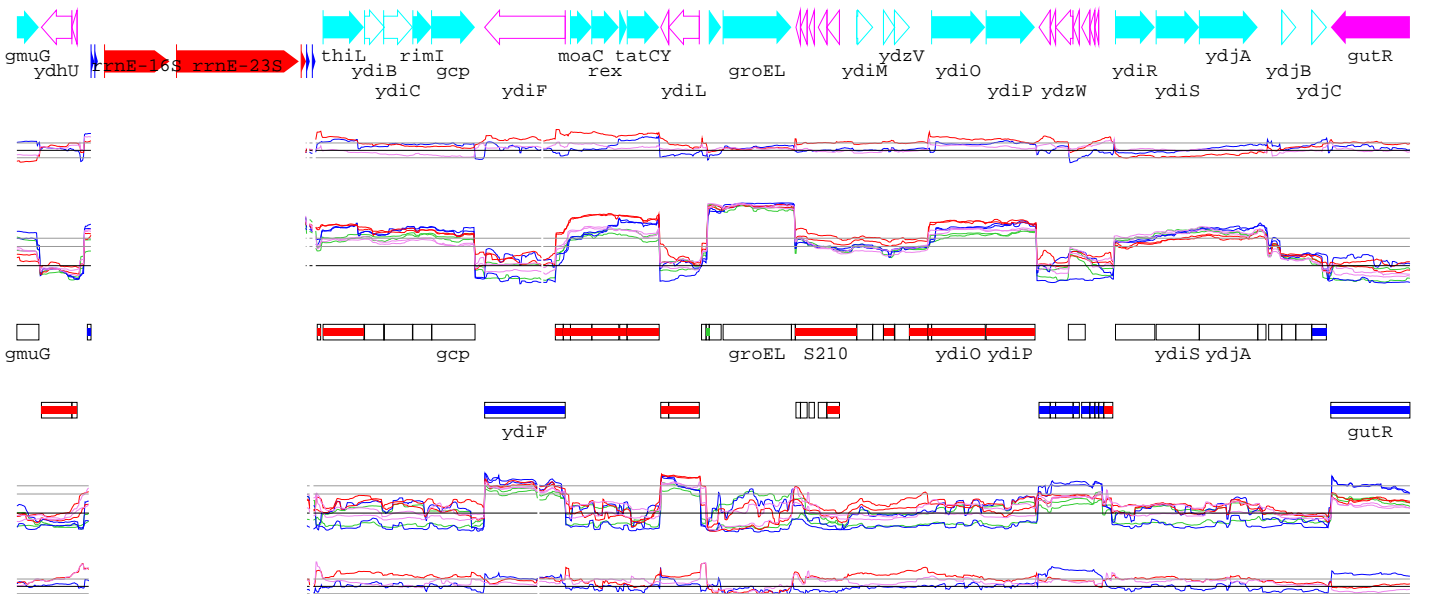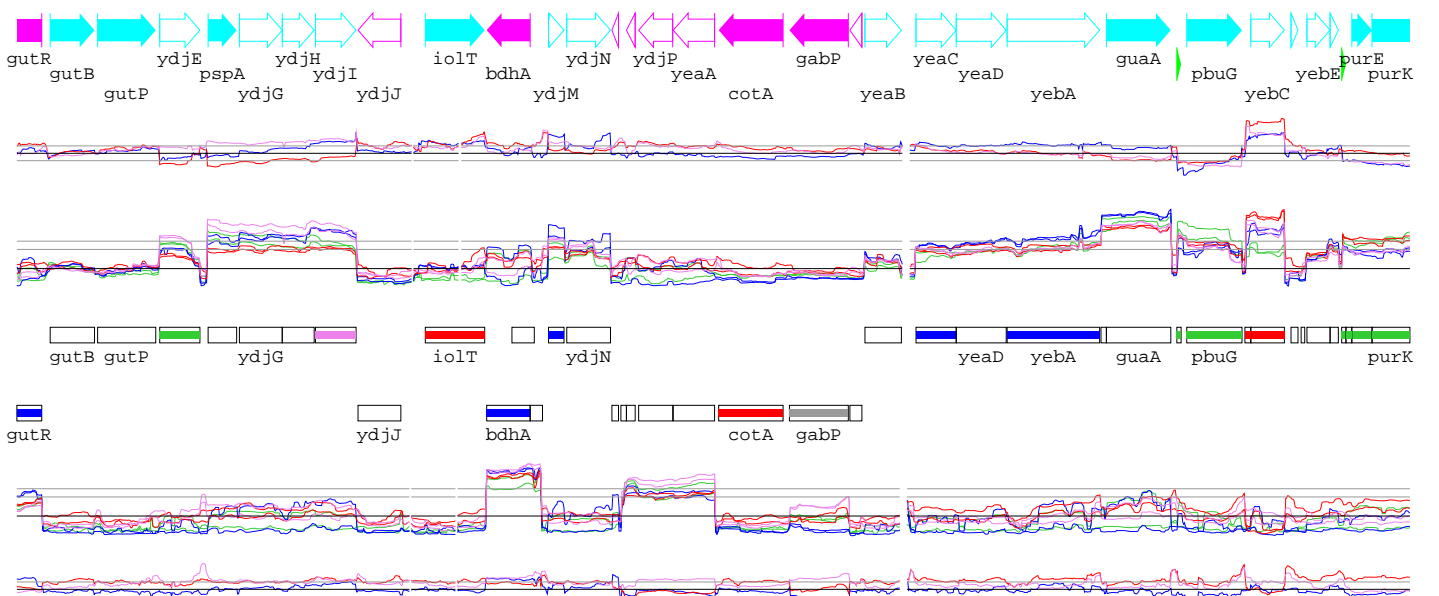

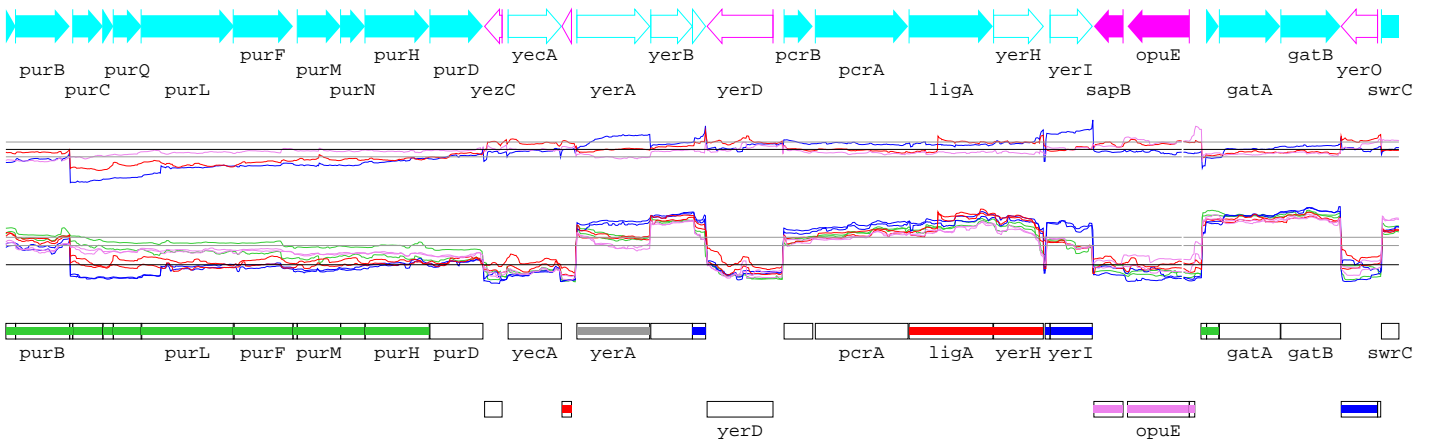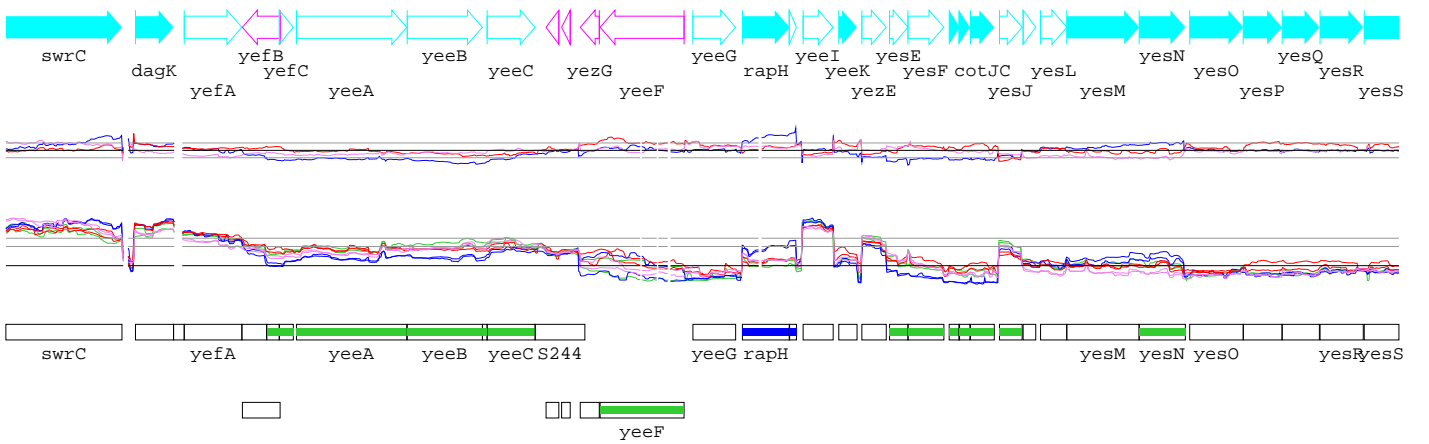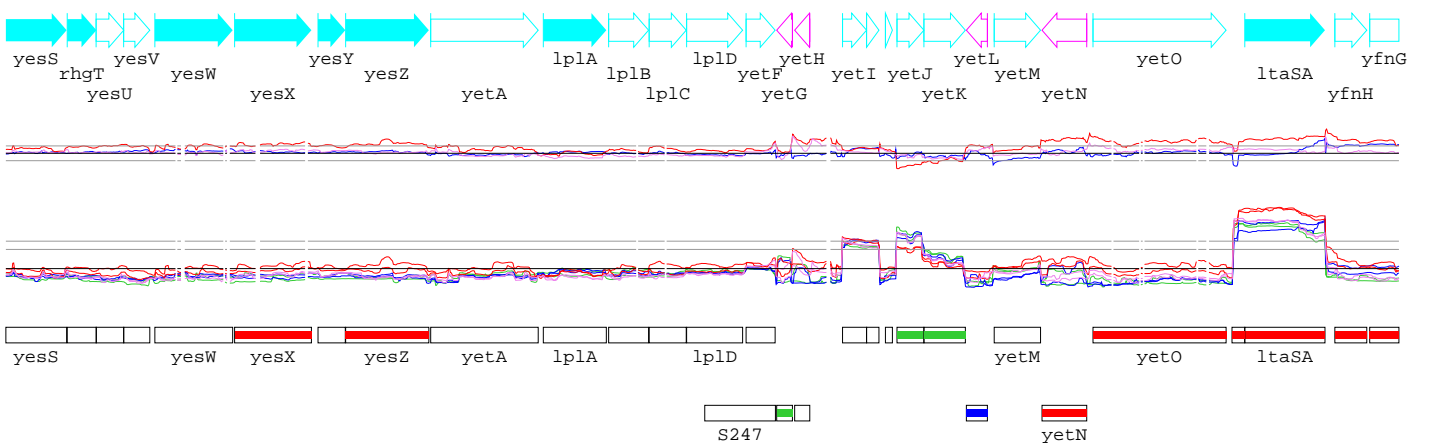



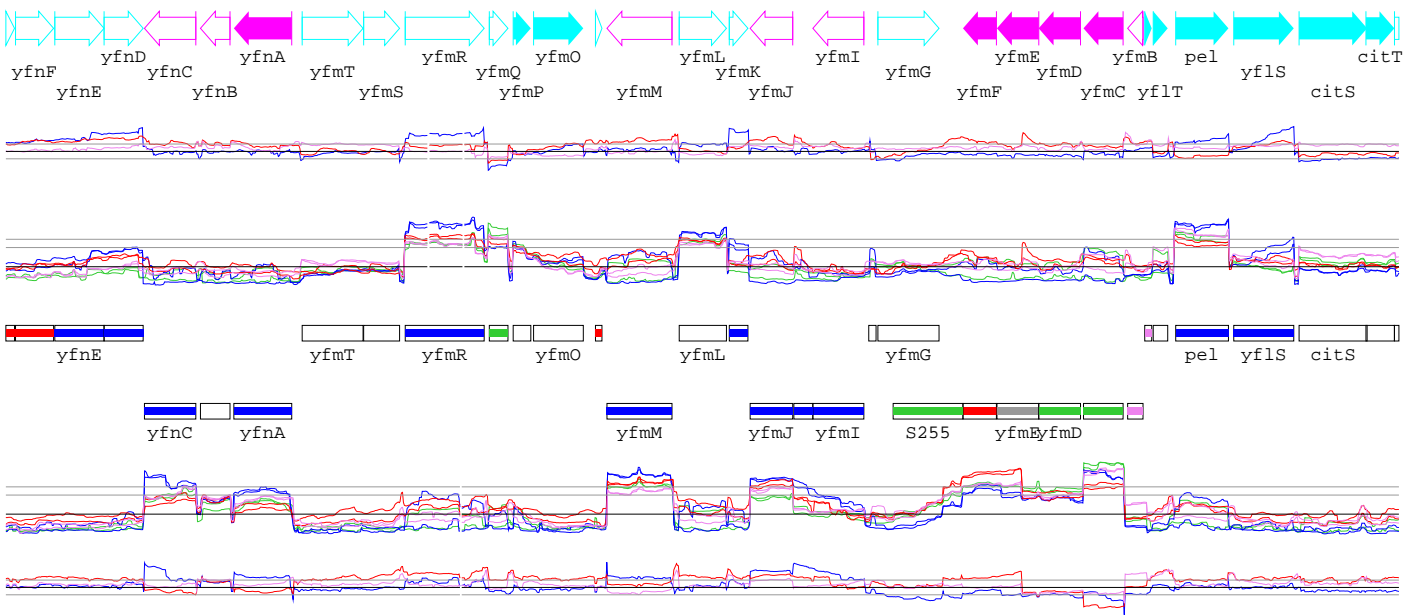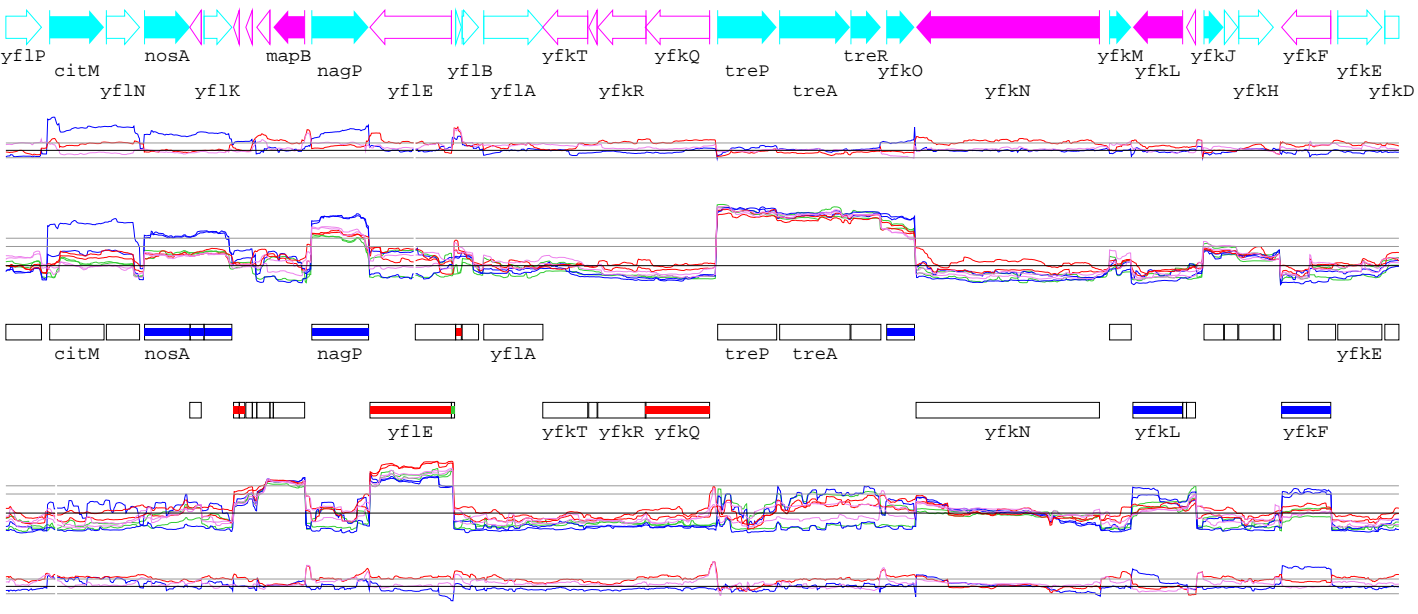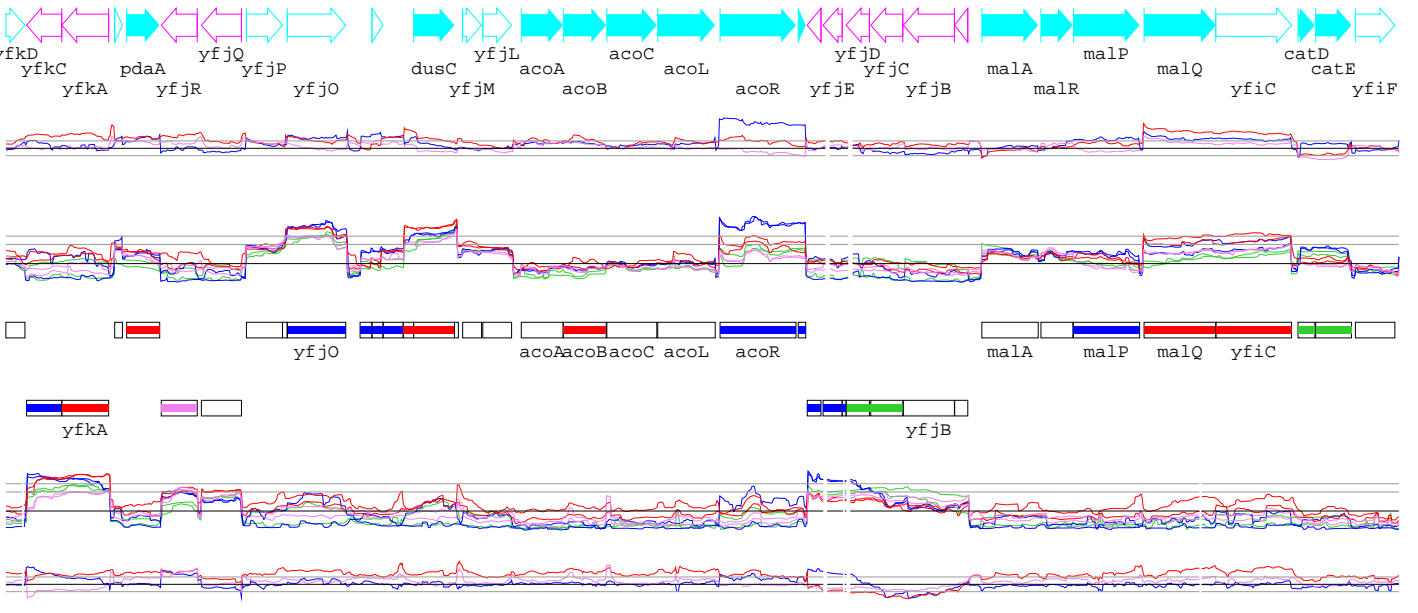

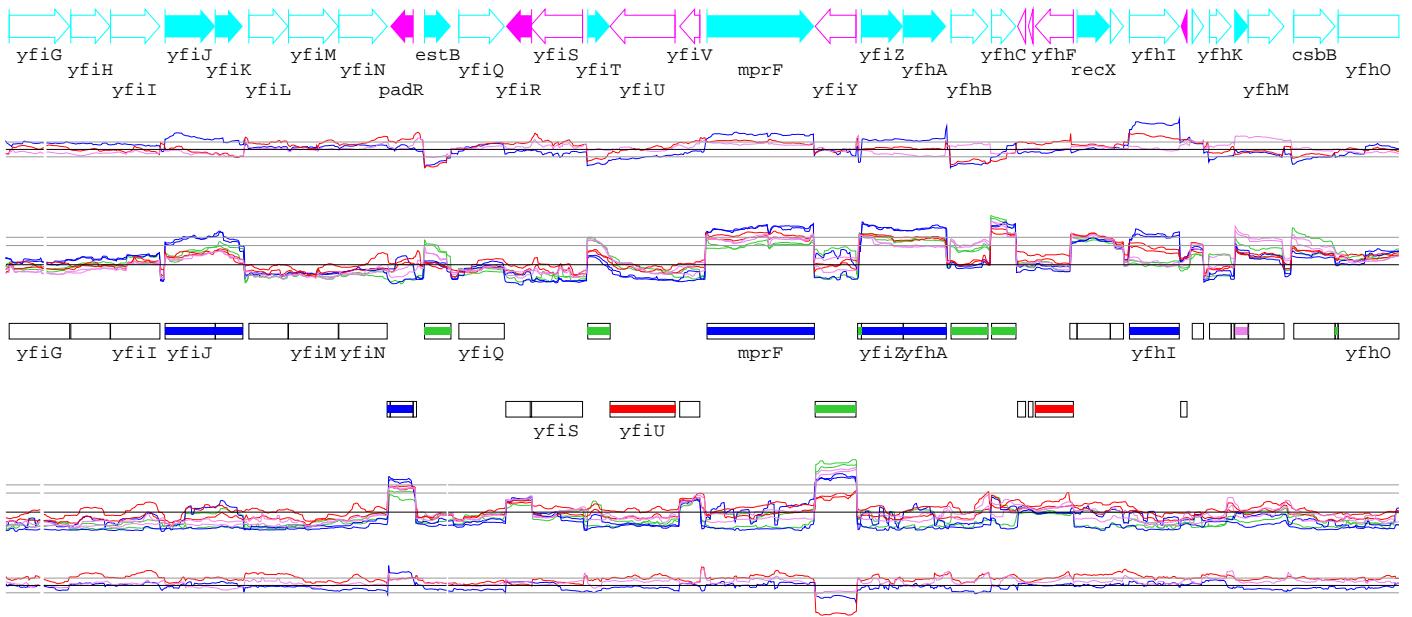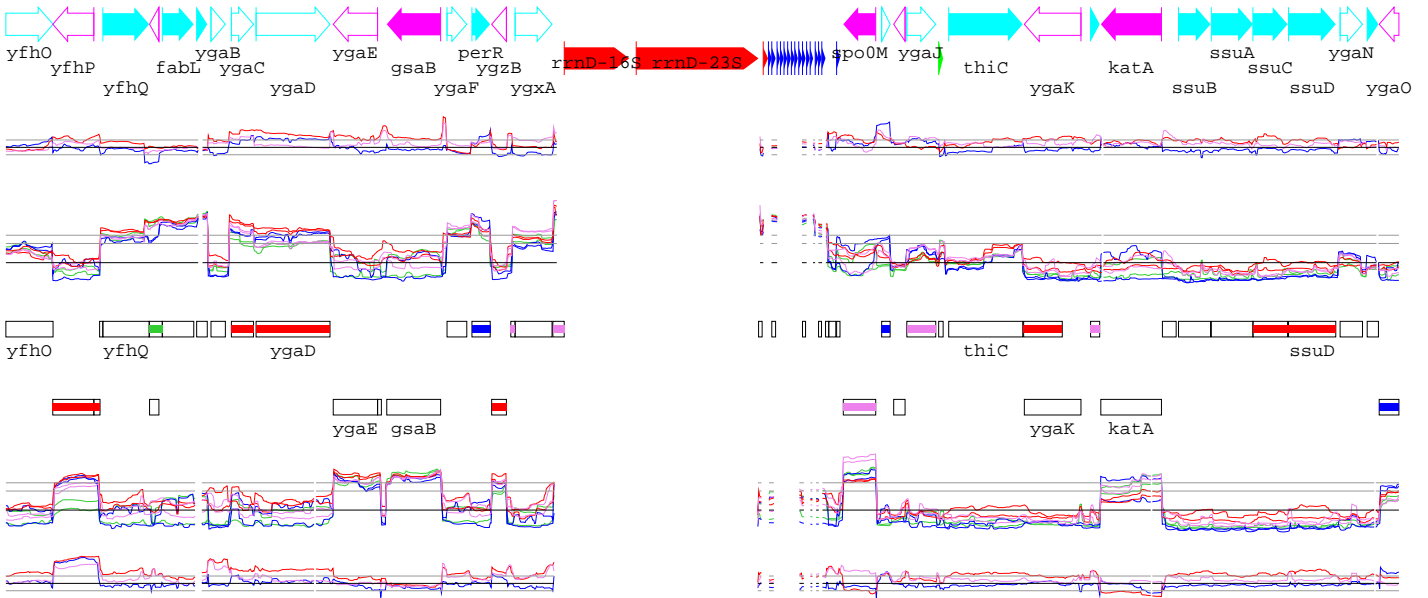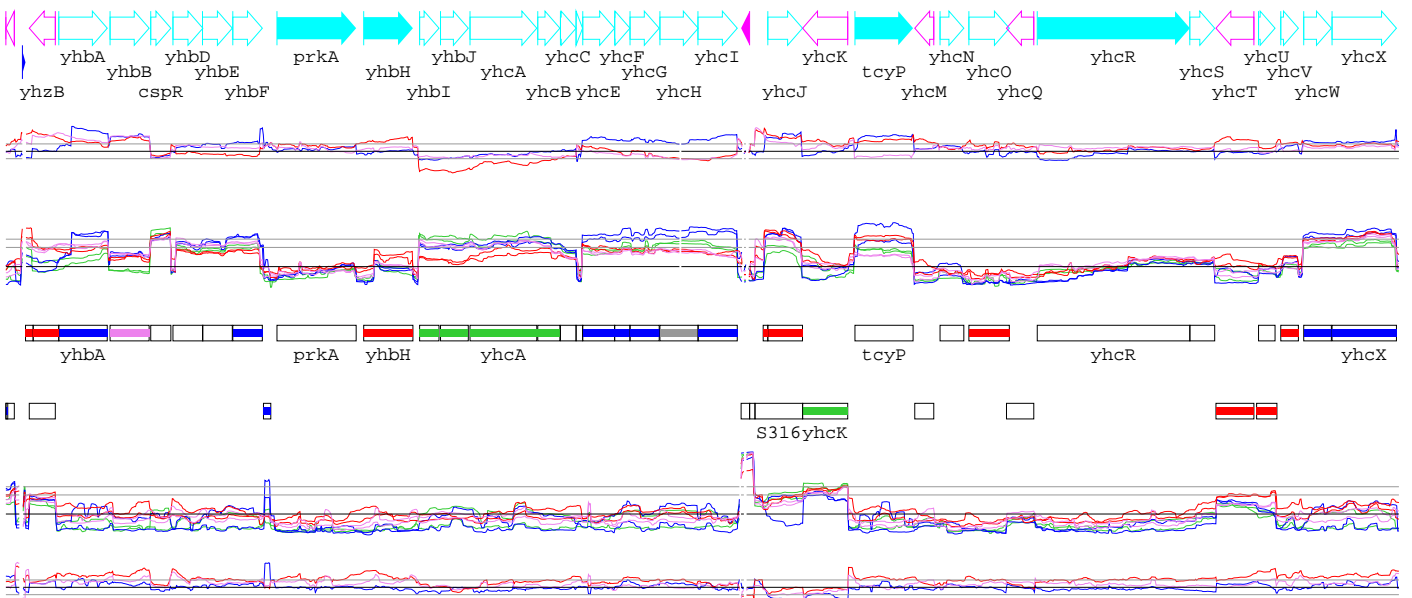

1 000 001

1 033 334

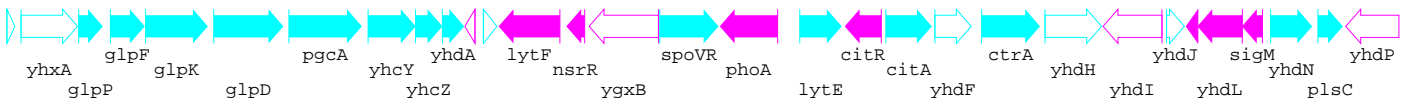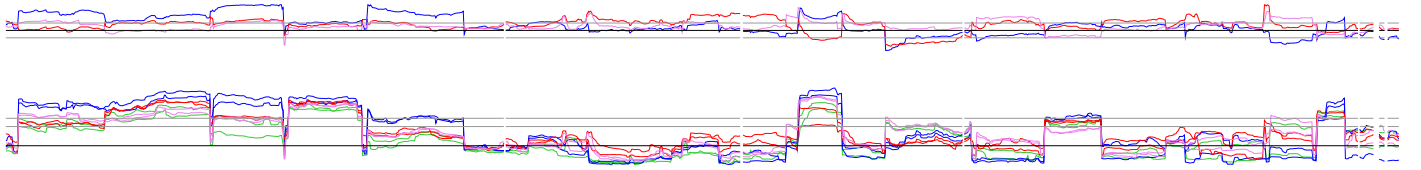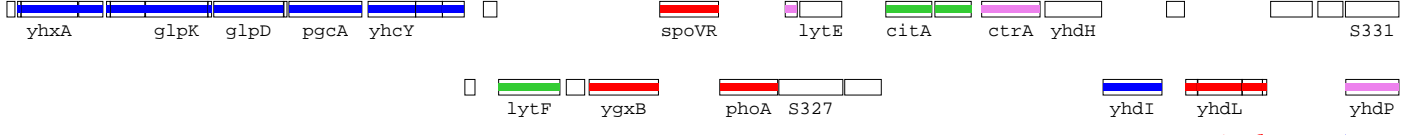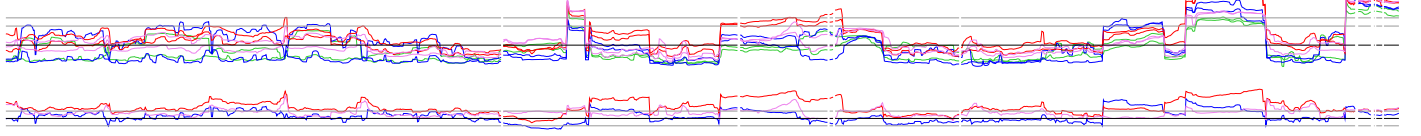

1 033 335

1 066 668

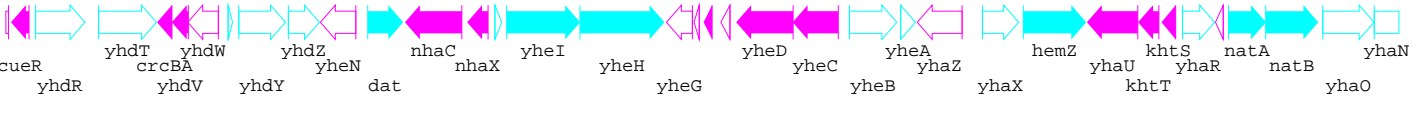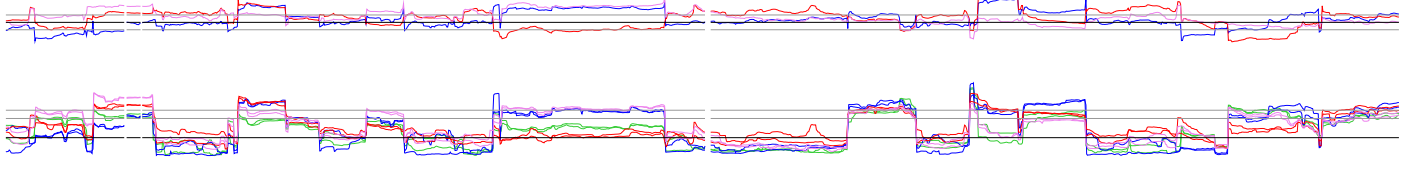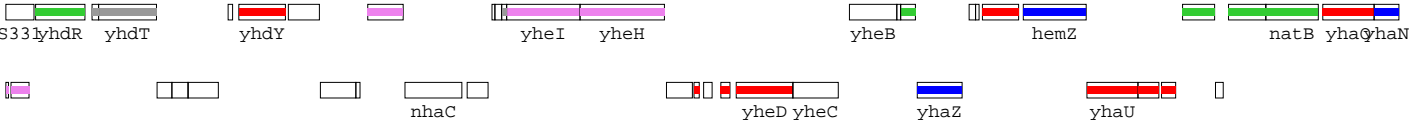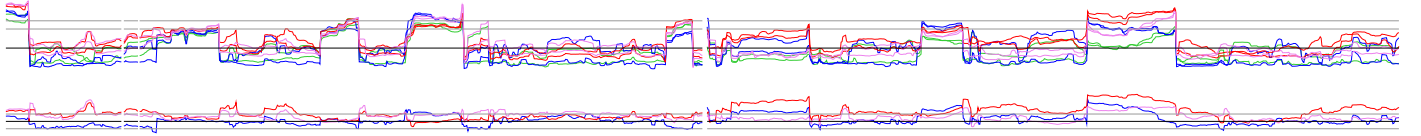

1 066 669

1 100 002

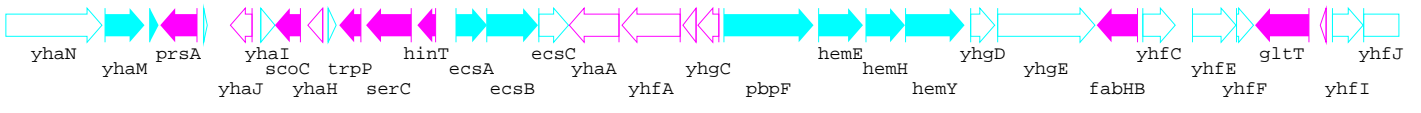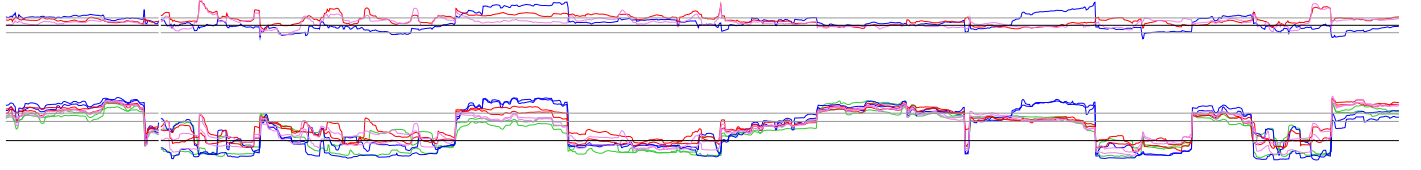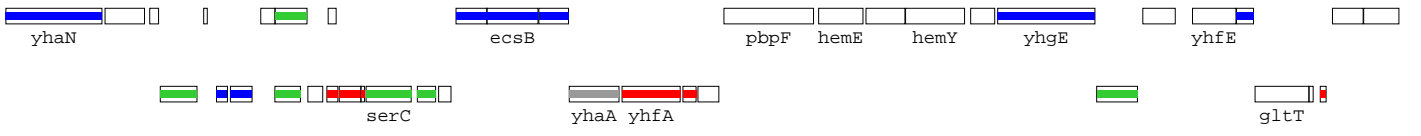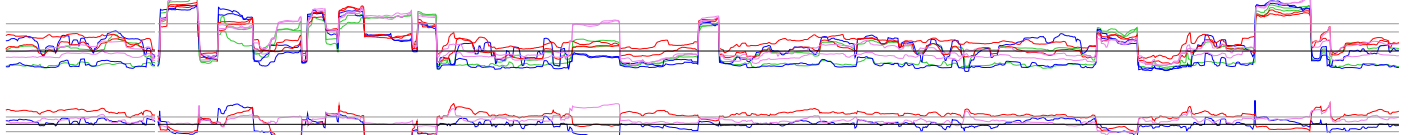

1 100 001

1 133 334

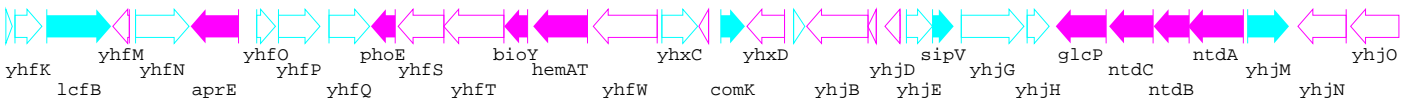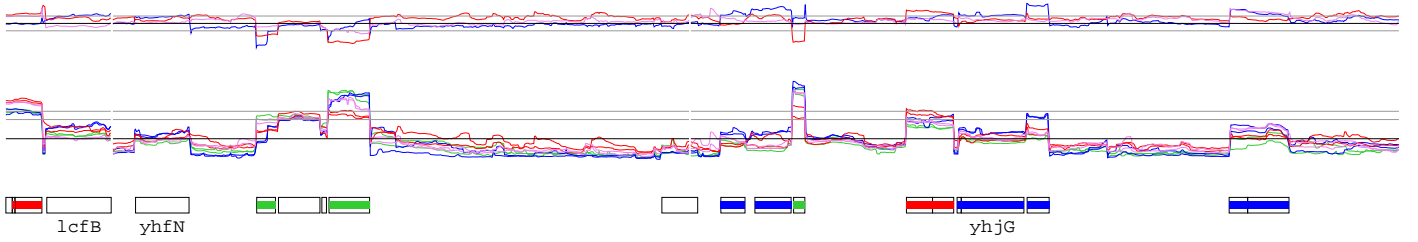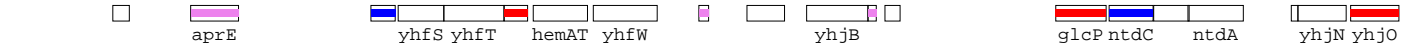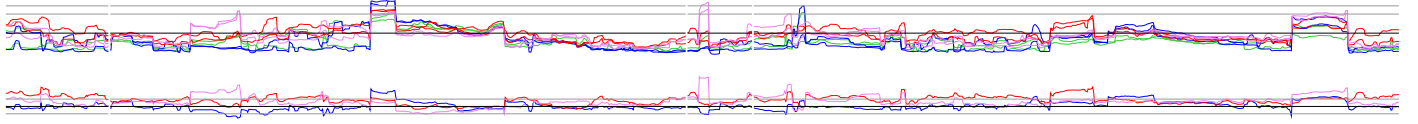

1 133 335

1 166 668

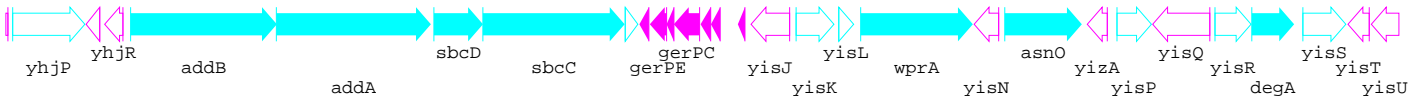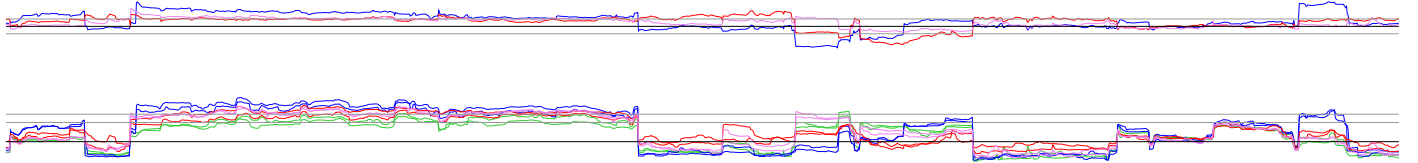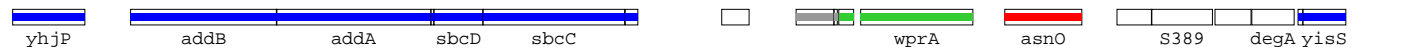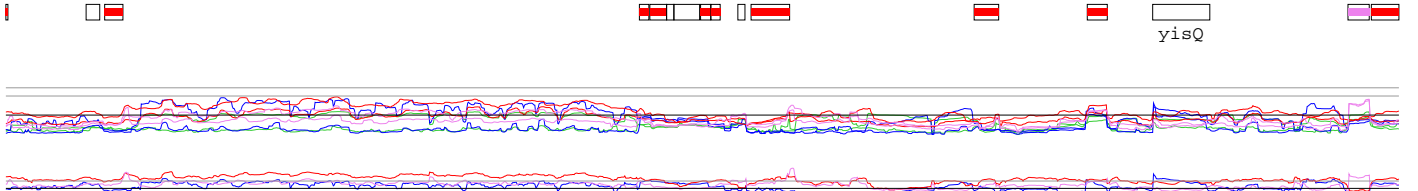

1 166 669

1 200 002

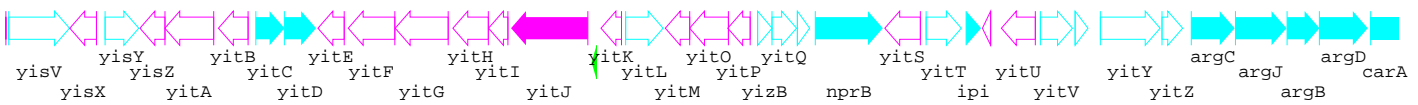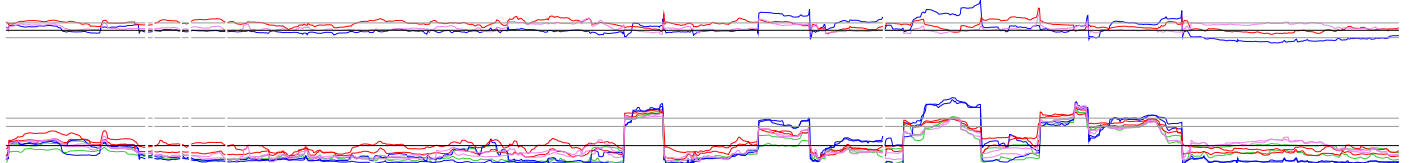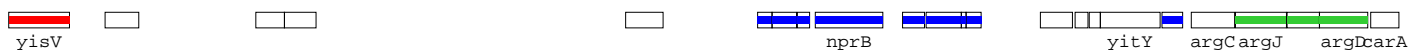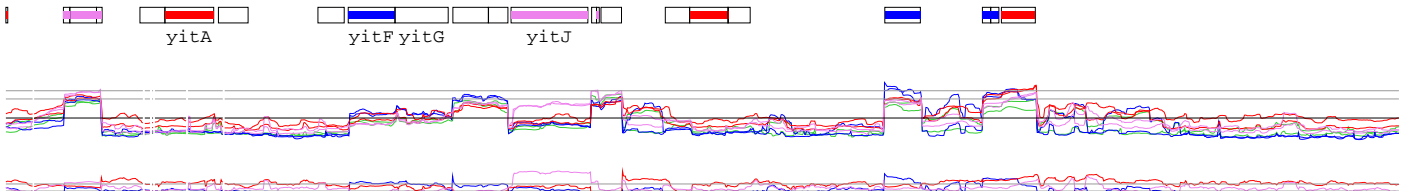

1 200 001

1 233 334

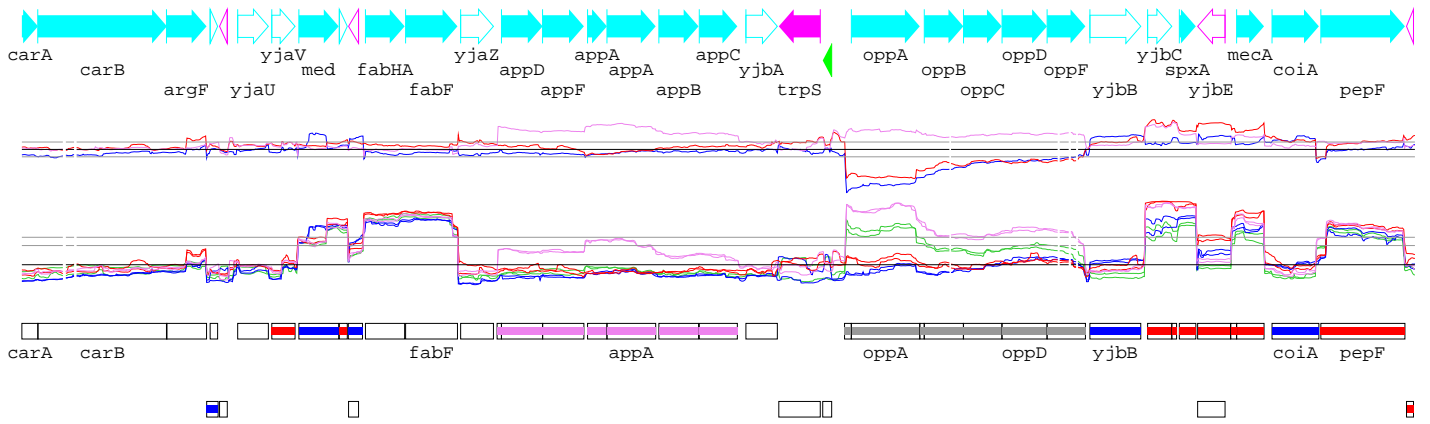

1 233 335

1 266 668

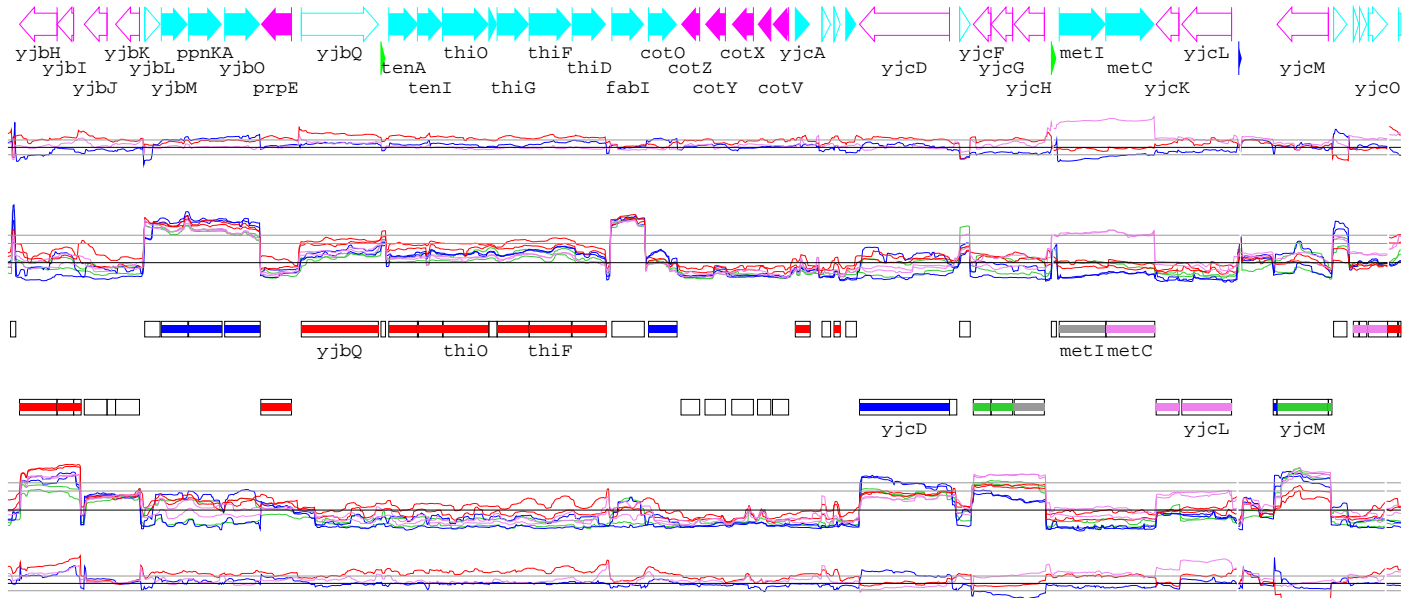

1 266 669

1 300 002

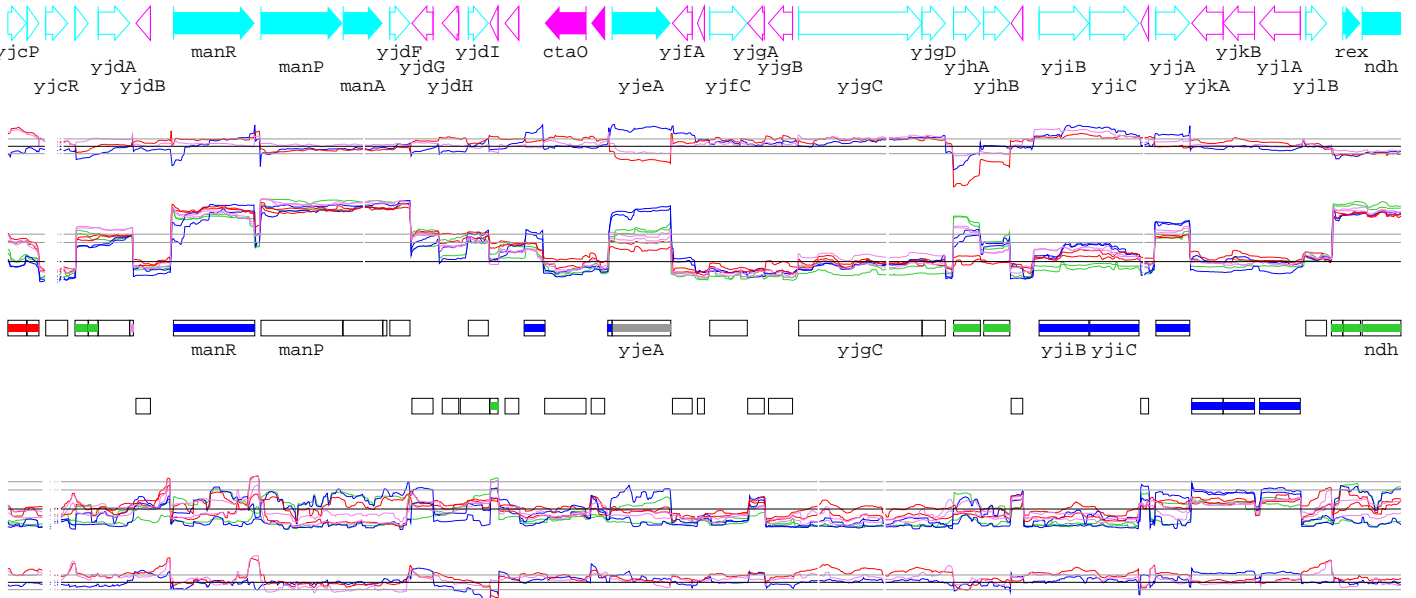

1 300 001

1 333 334

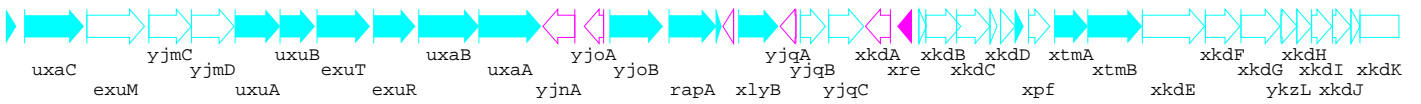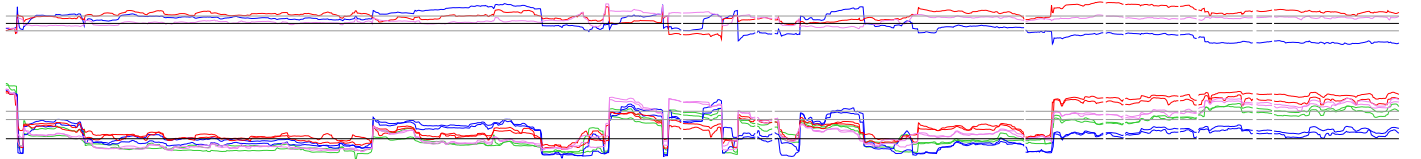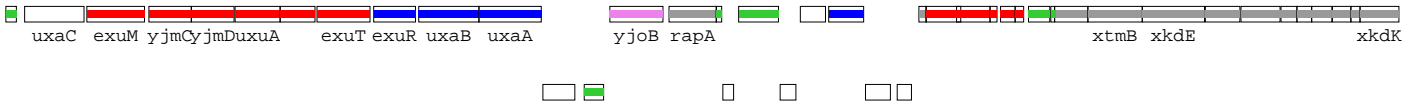

1 333 335

1 366 668

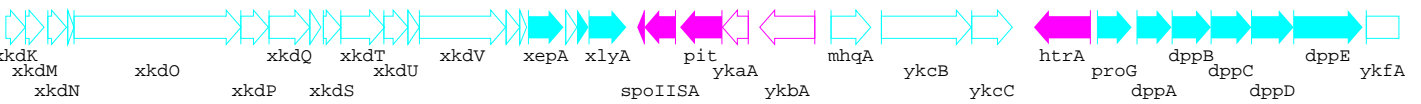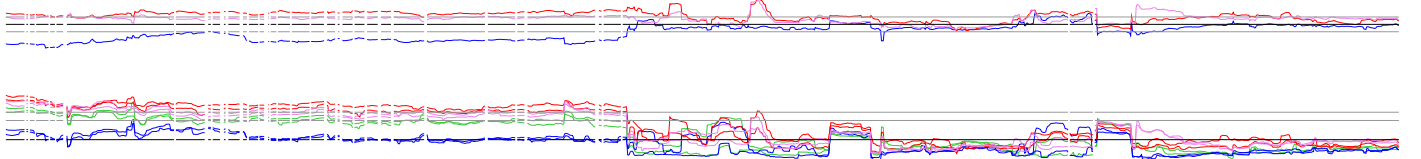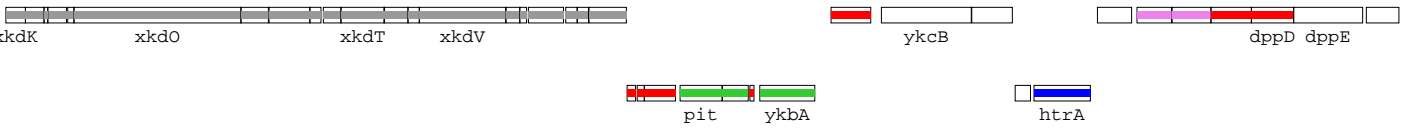

1 366 669

1 400 002

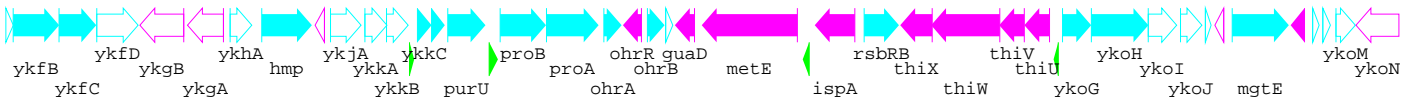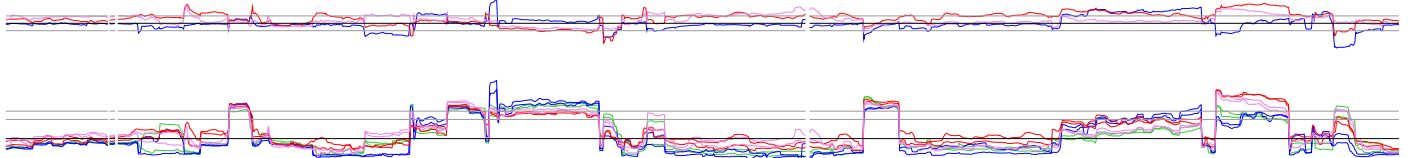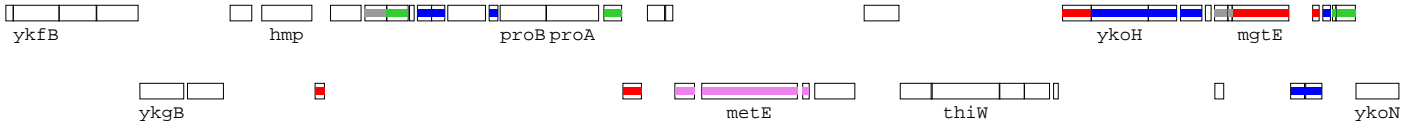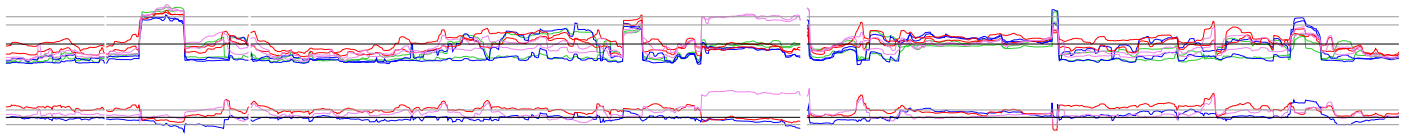

1 400 001

1 433 334

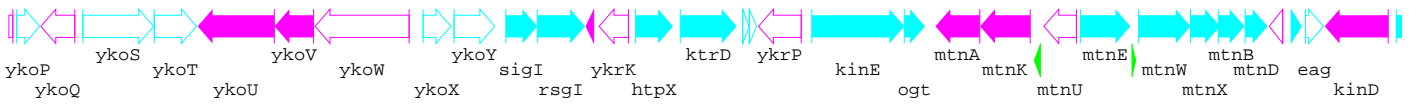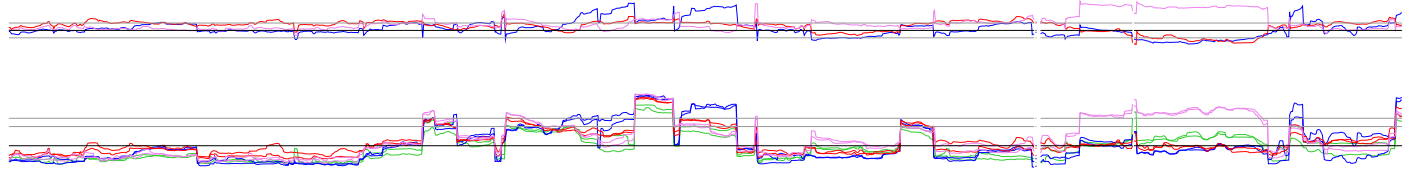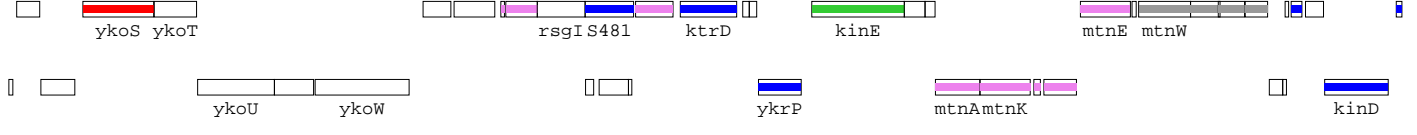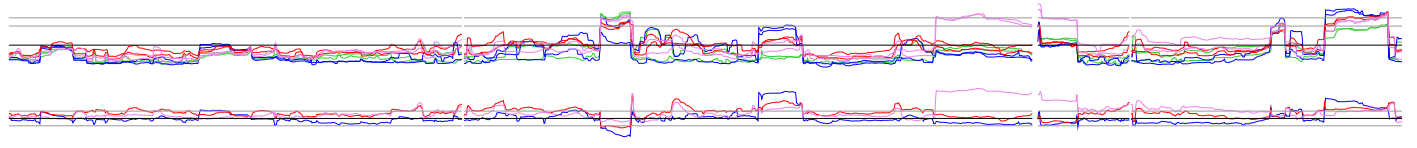

1 433 335

1 466 668

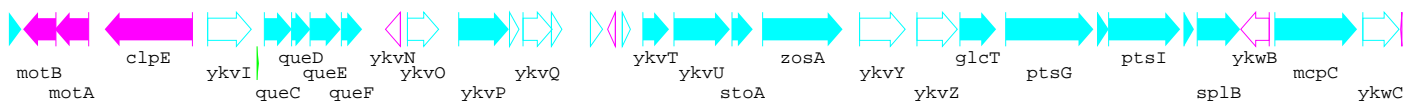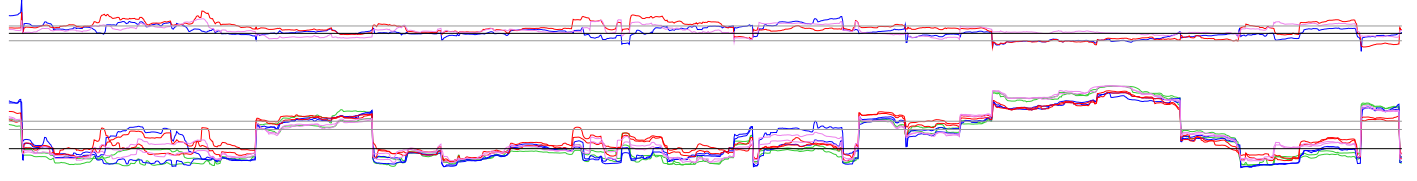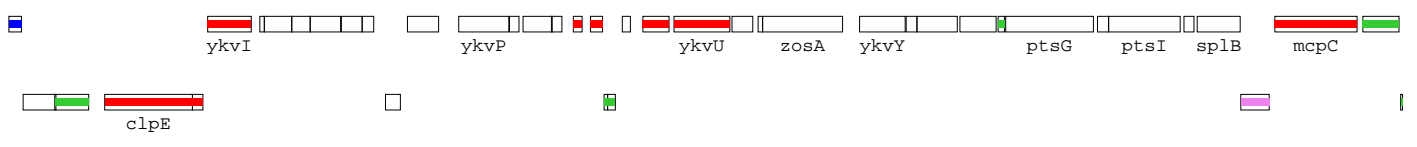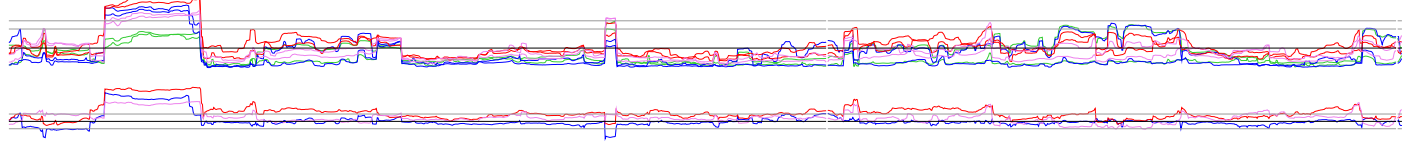

1 466 669

1 500 002

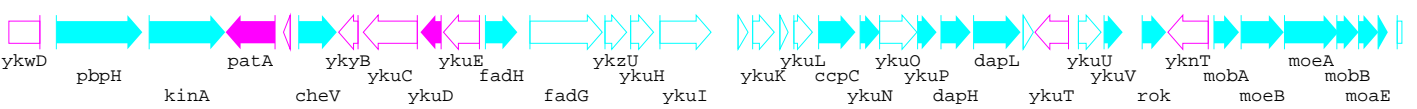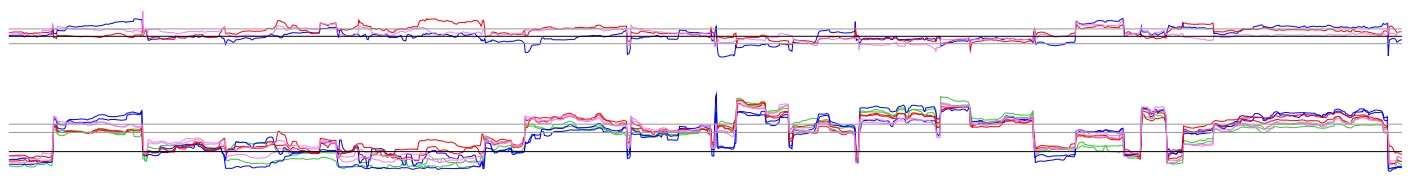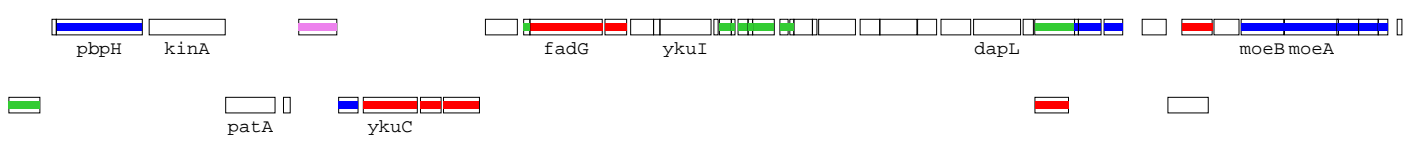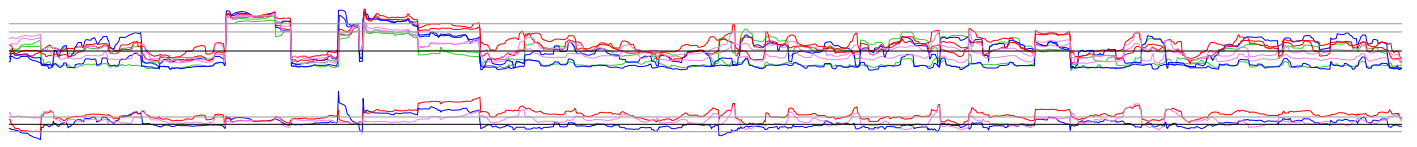

1 500 001

1 533 334

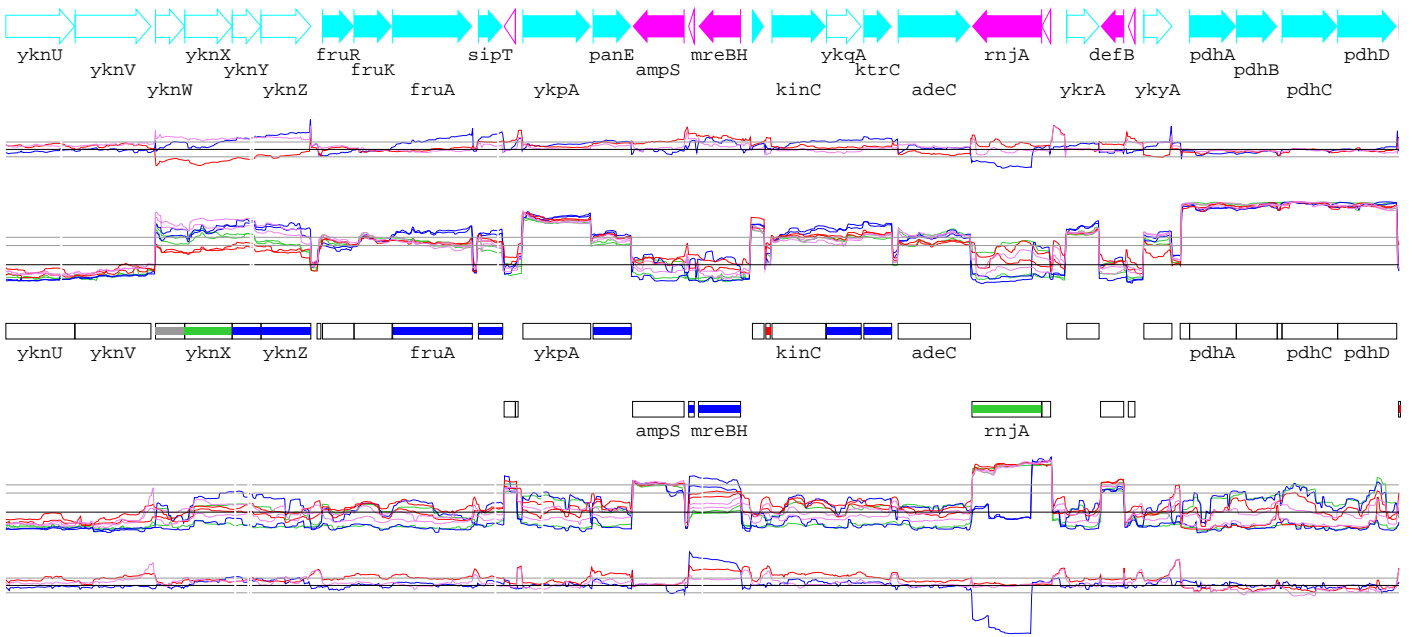

1 533 335

1 566 668

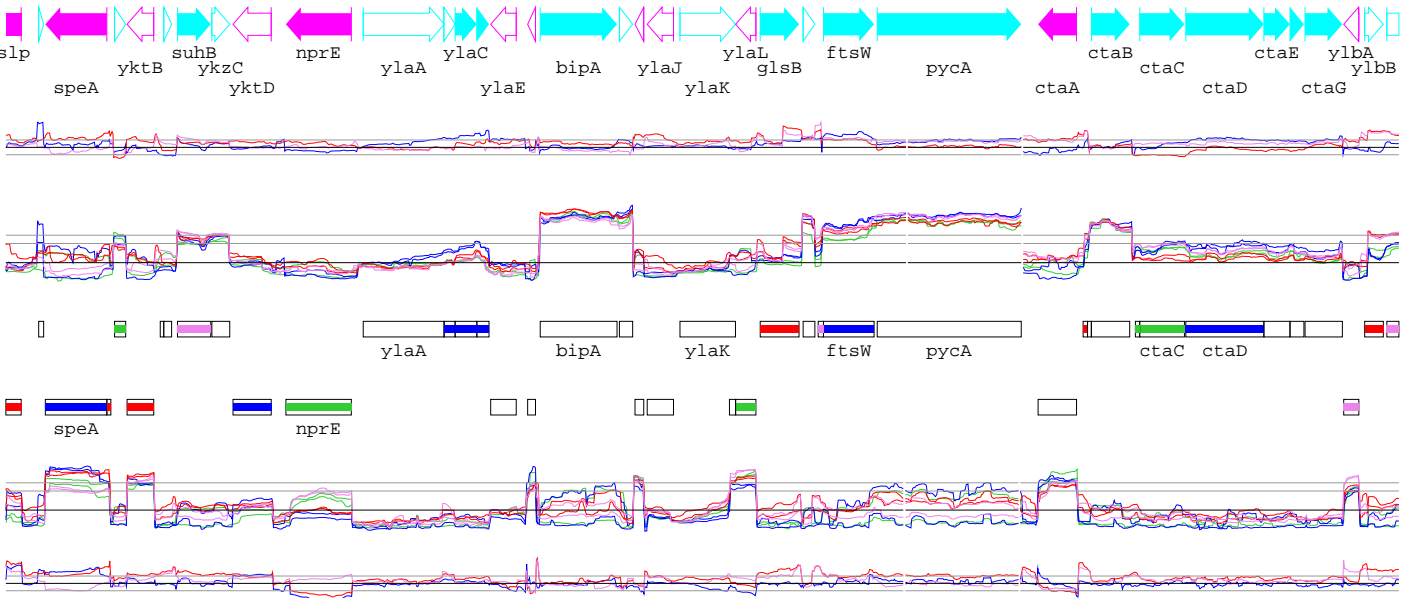

1 566 669

1 600 002

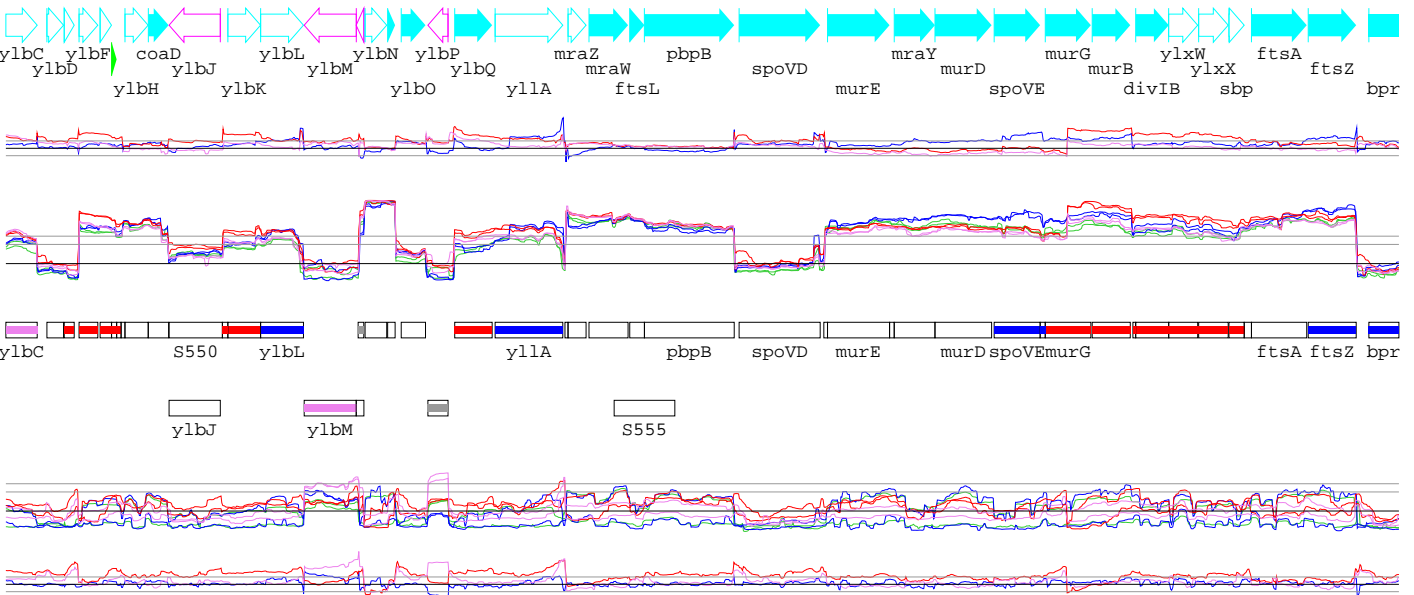



1 600 001

1 633 334

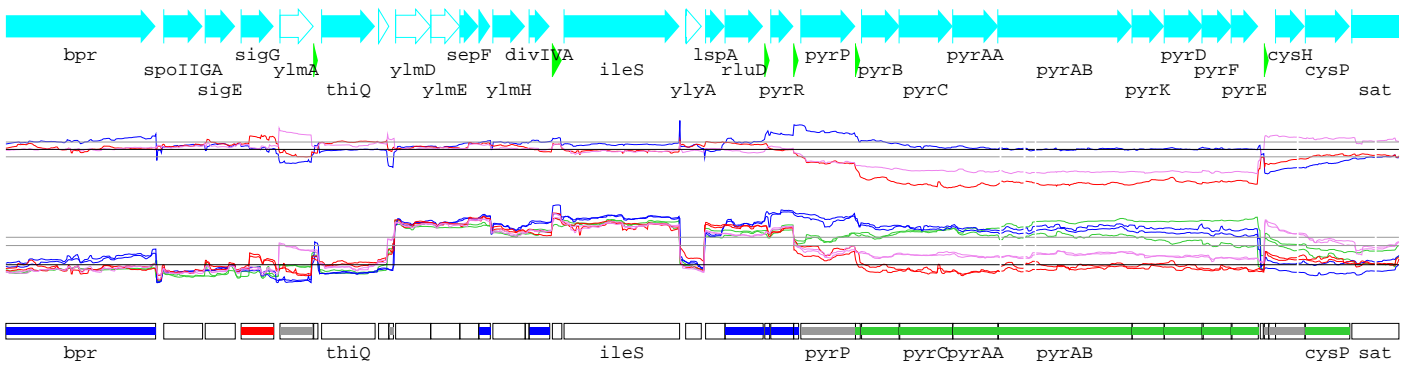

1 633 335

1 666 668

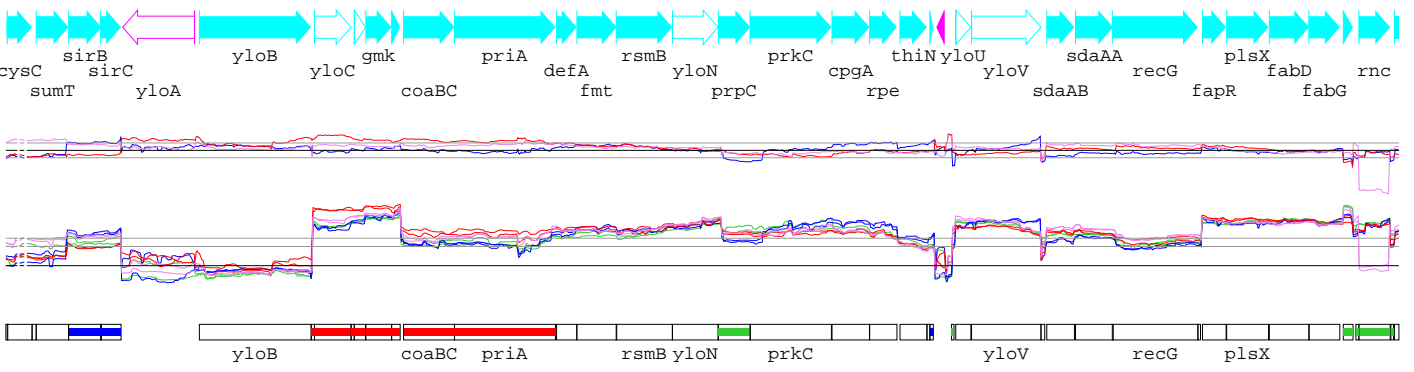

1 666 669

1 700 002

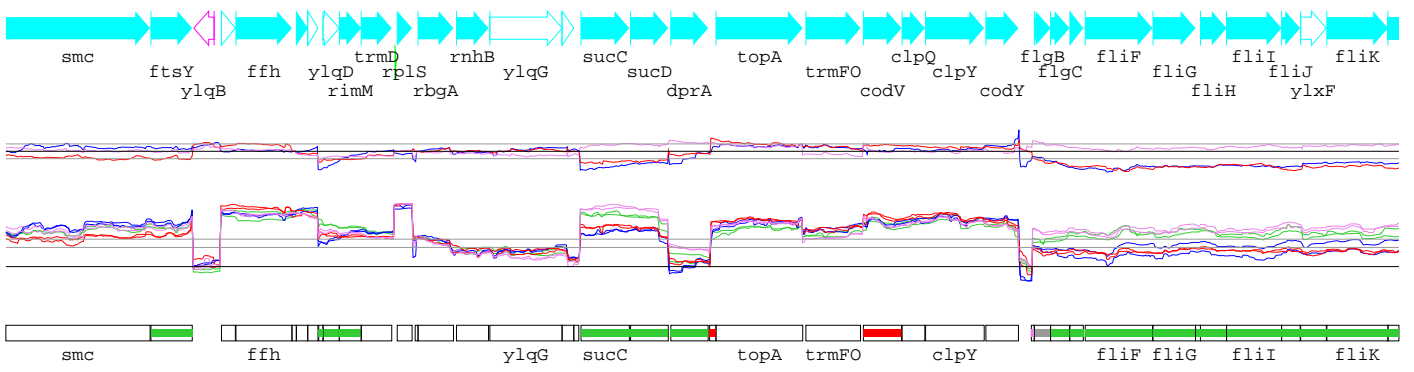

1 700 001

1 733 334

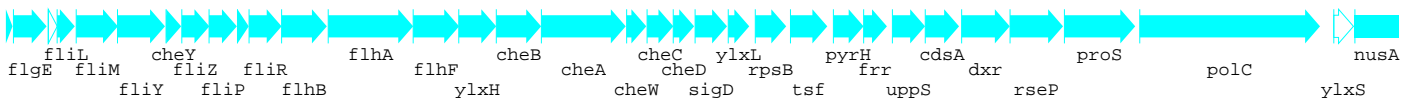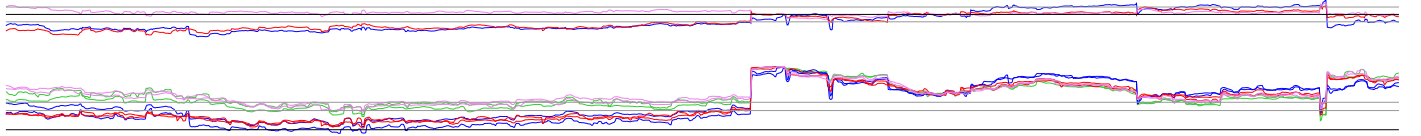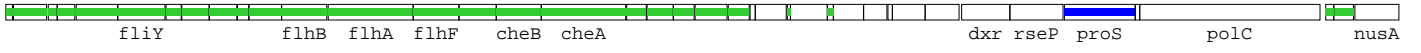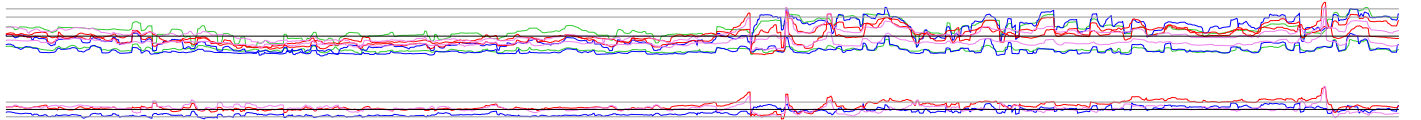

1 733 335

1 766 668

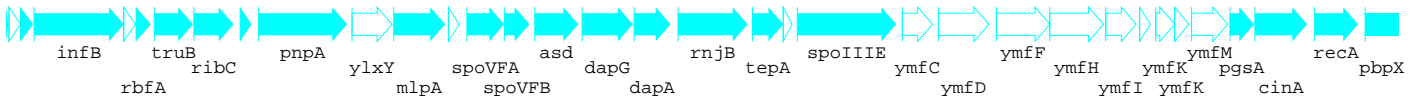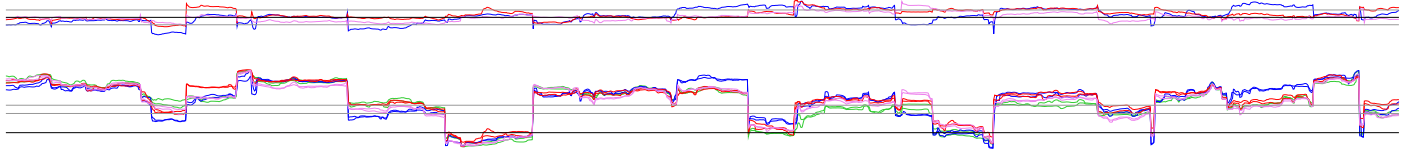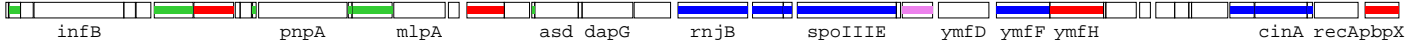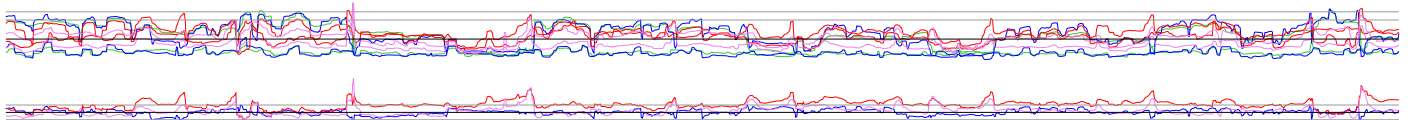

1 766 669

1 800 002

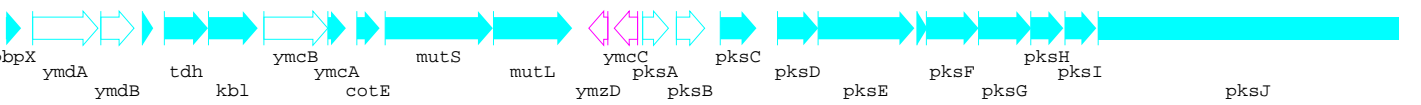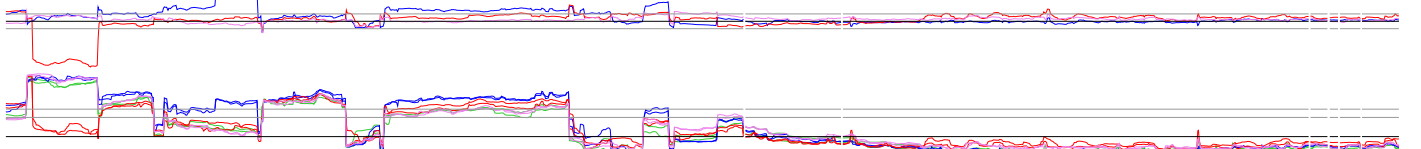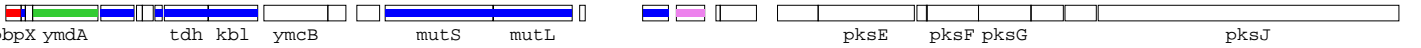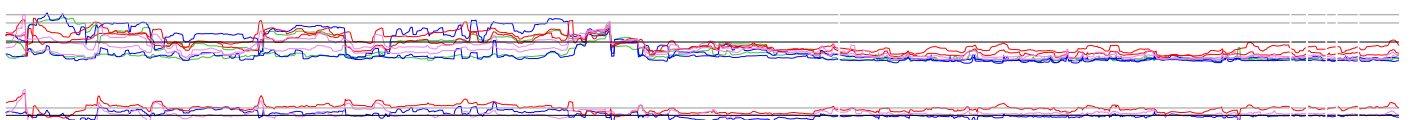

1 800 001

1 833 334

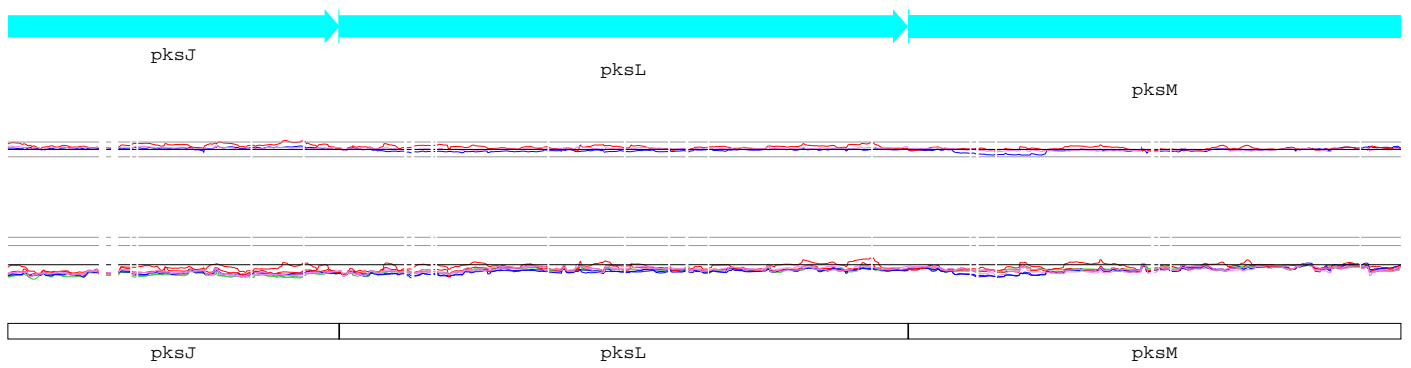

1 833 335

1 866 668

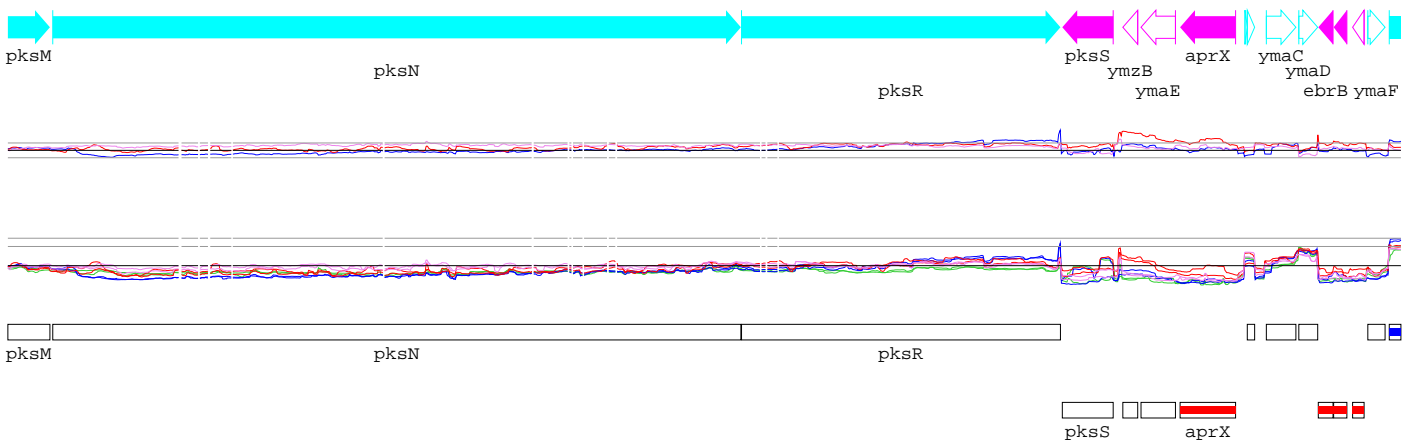

1 866 669

1 900 002

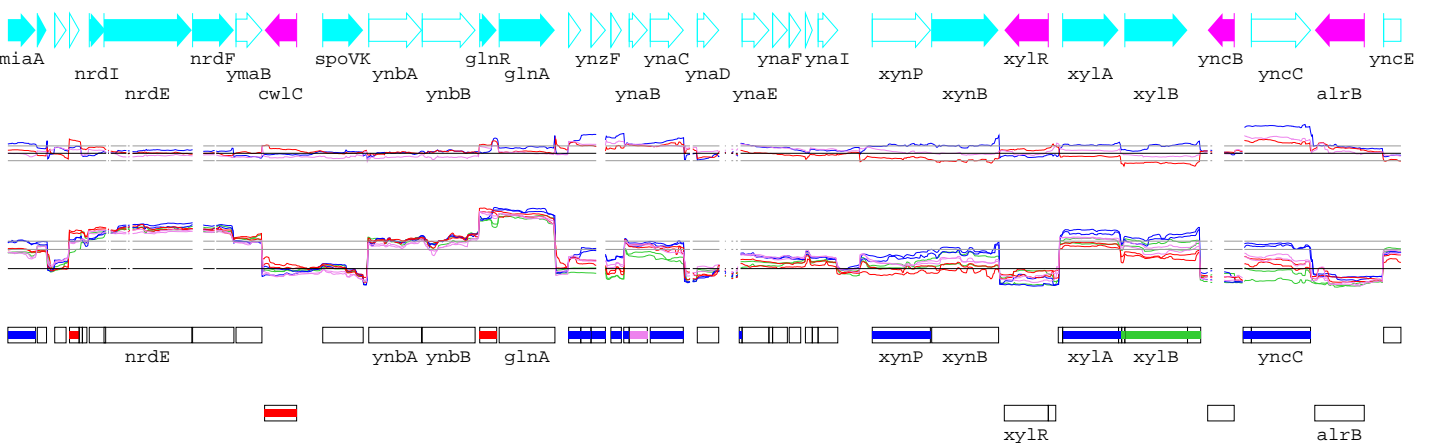

1 900 001

1 933 334

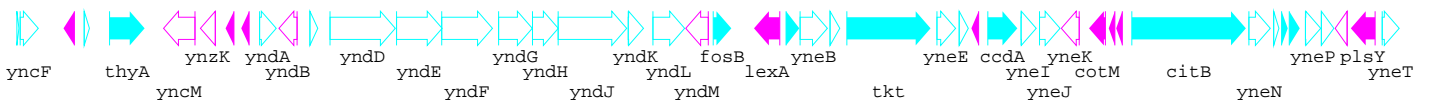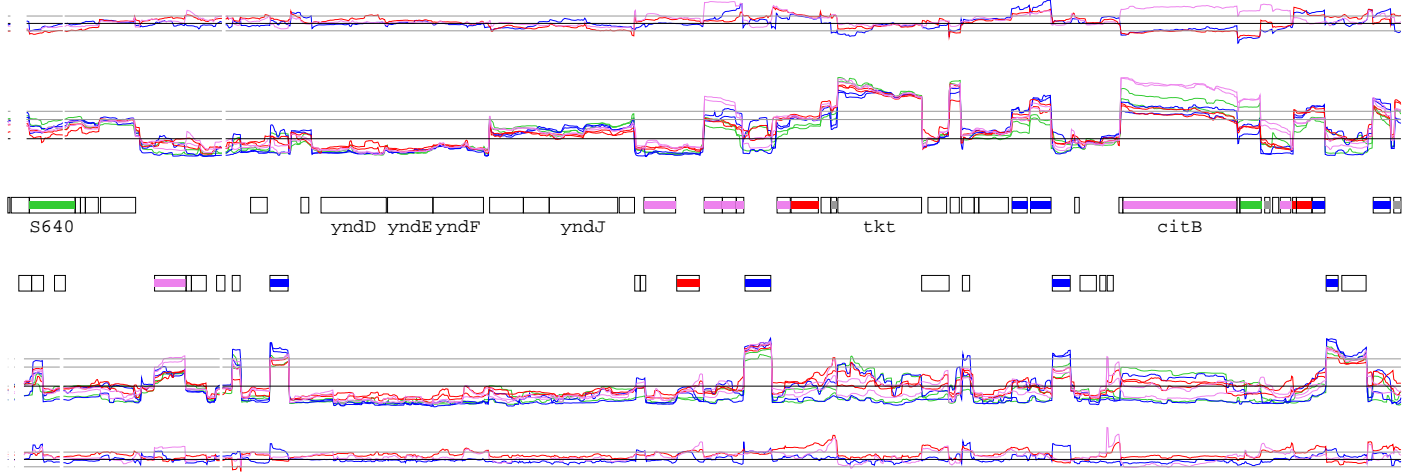

1 933 335

1 966 668

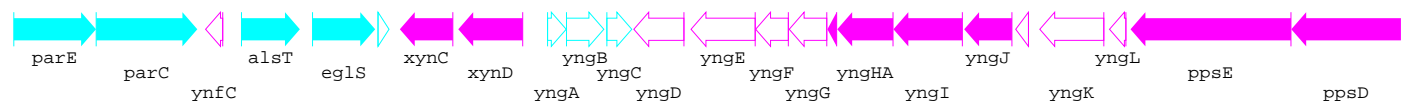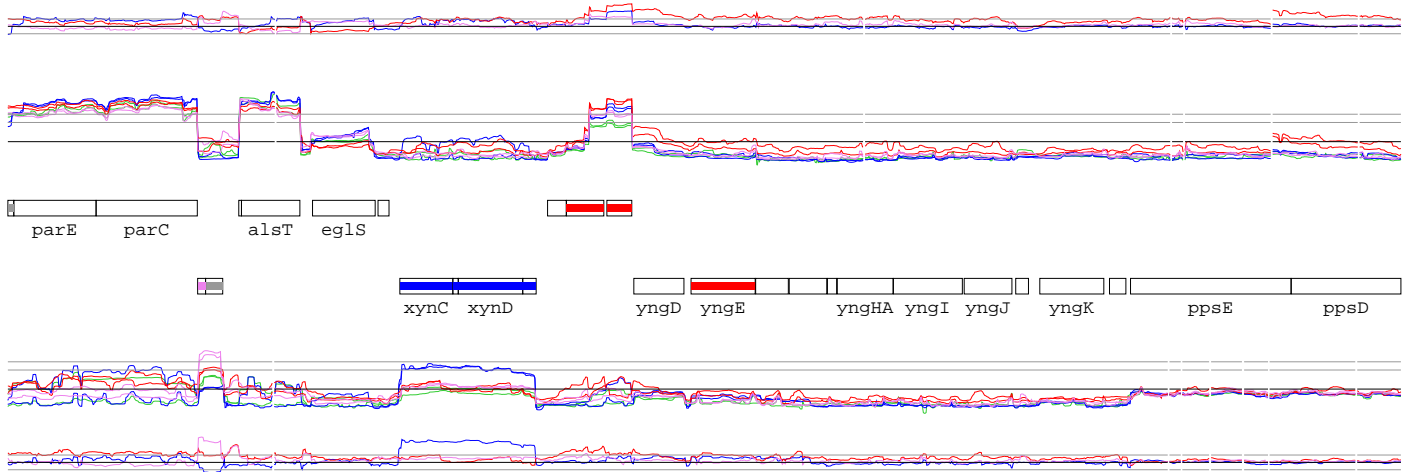

1 966 669

2 000 002

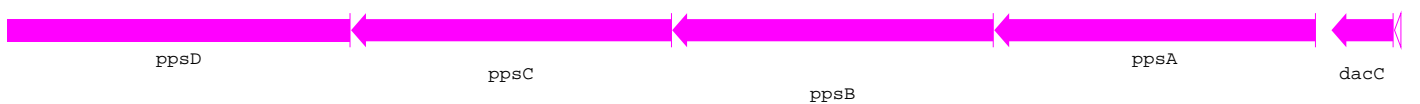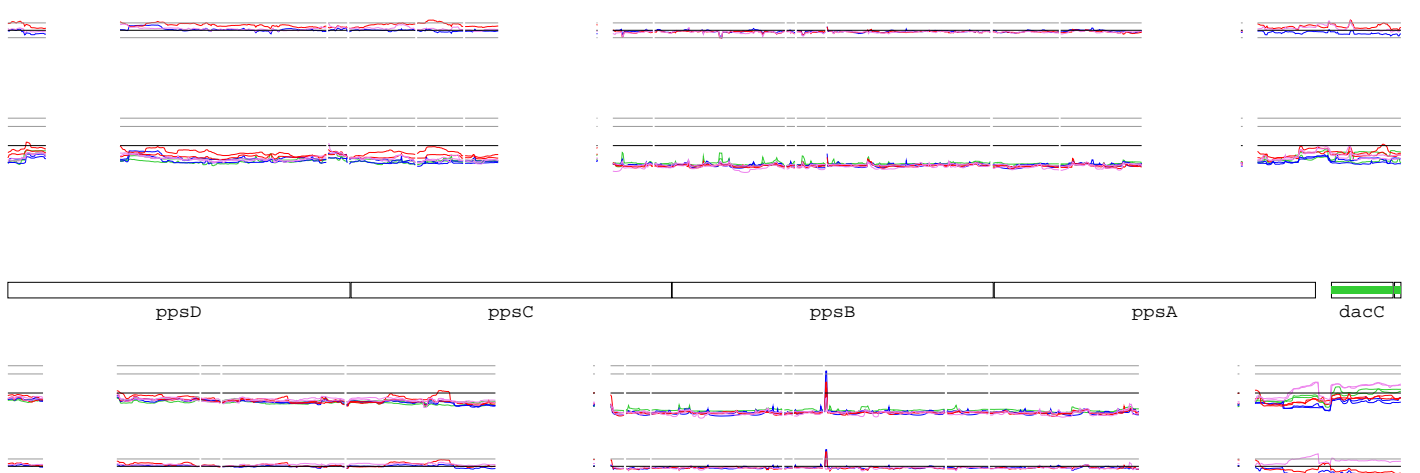

2 000 001

2 033 334

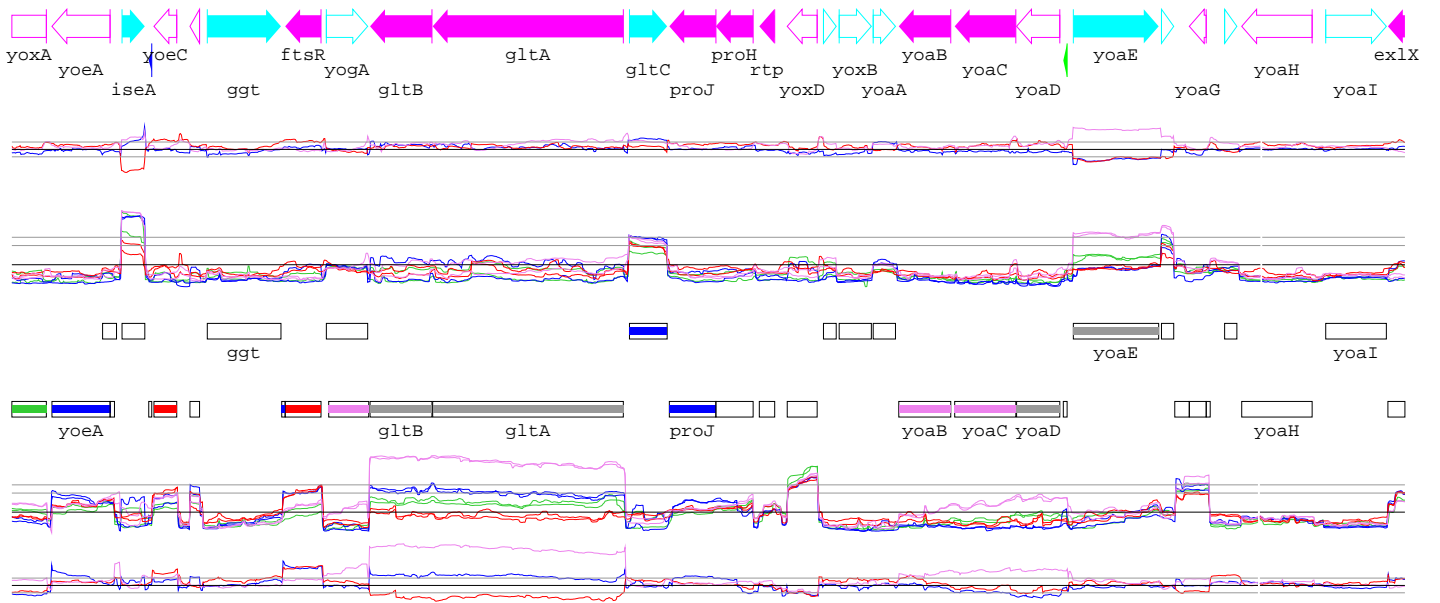

2 033 335

2 066 668

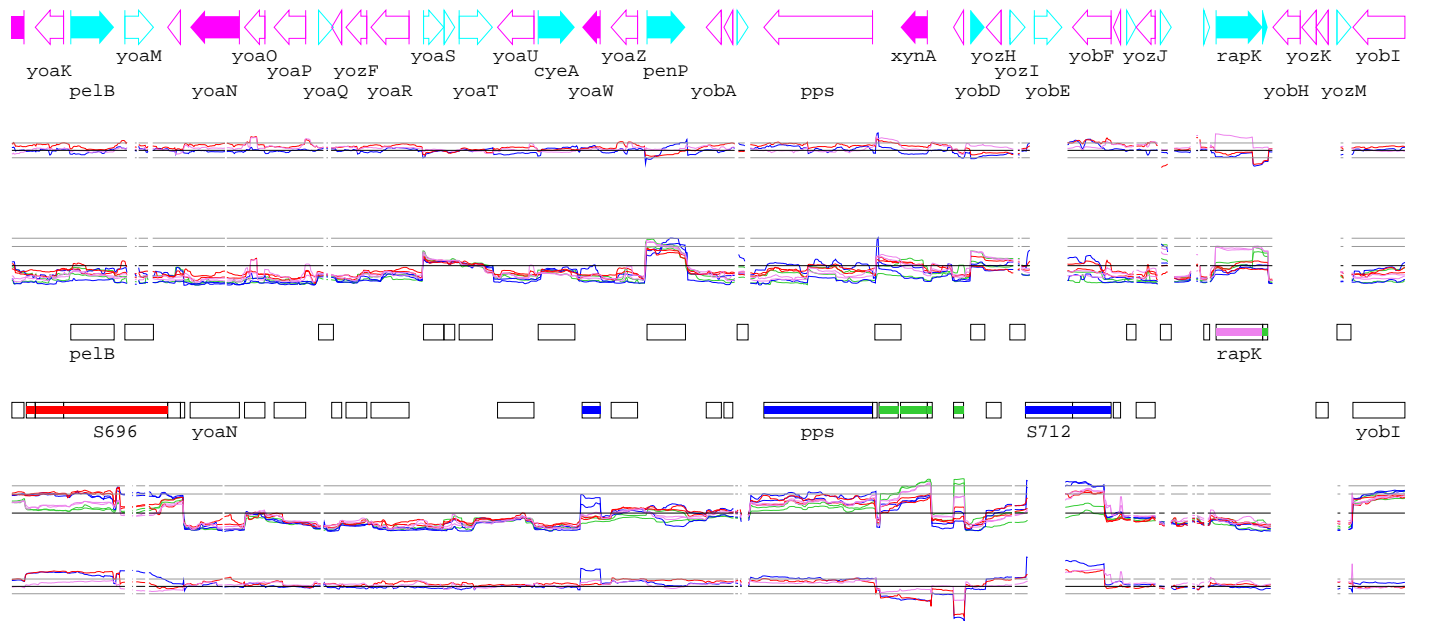

2 066 669

2 100 002

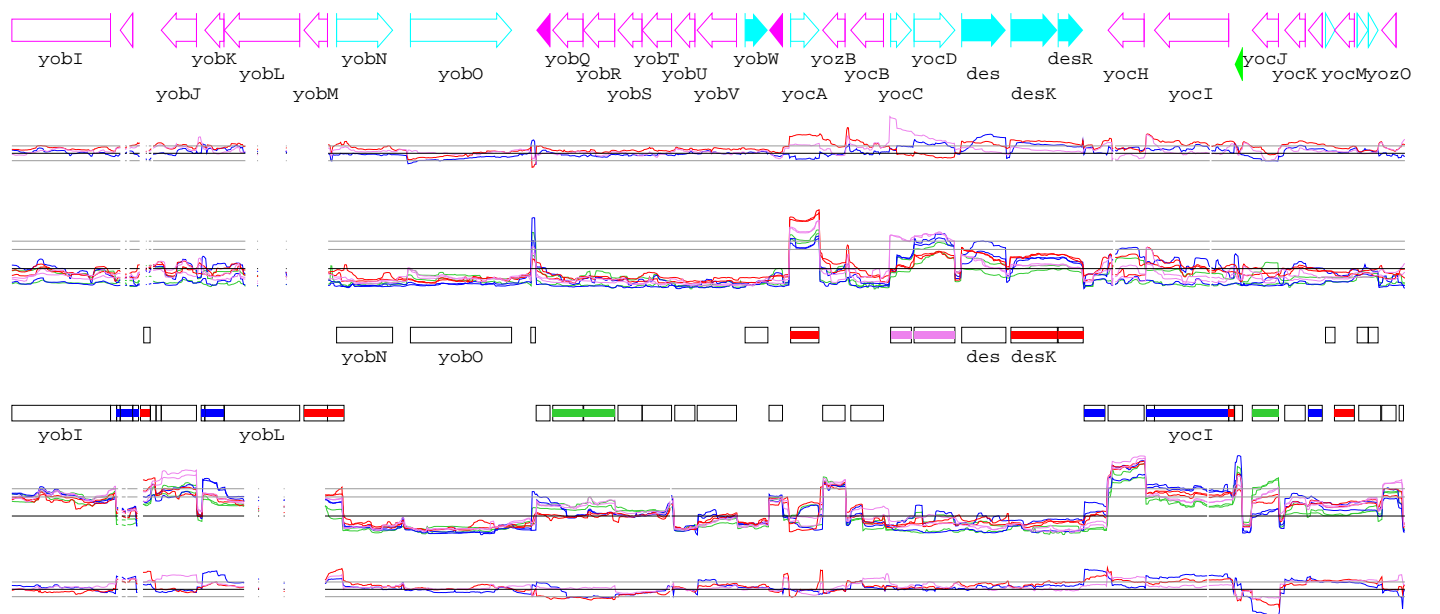

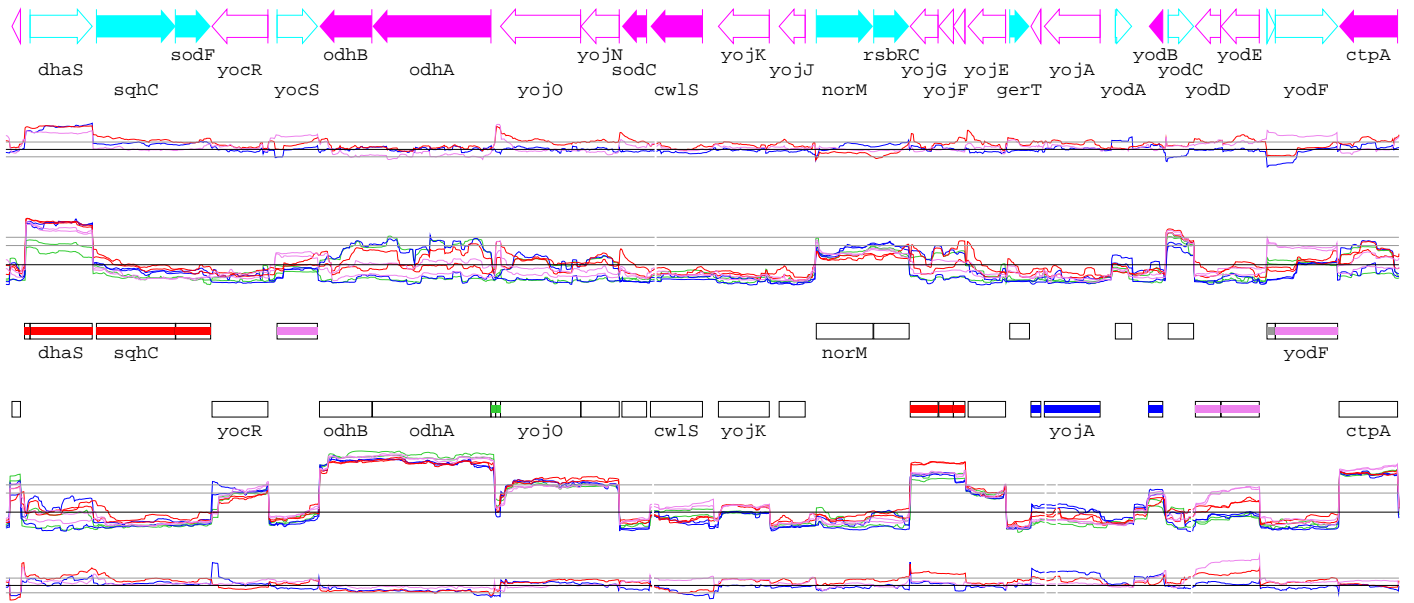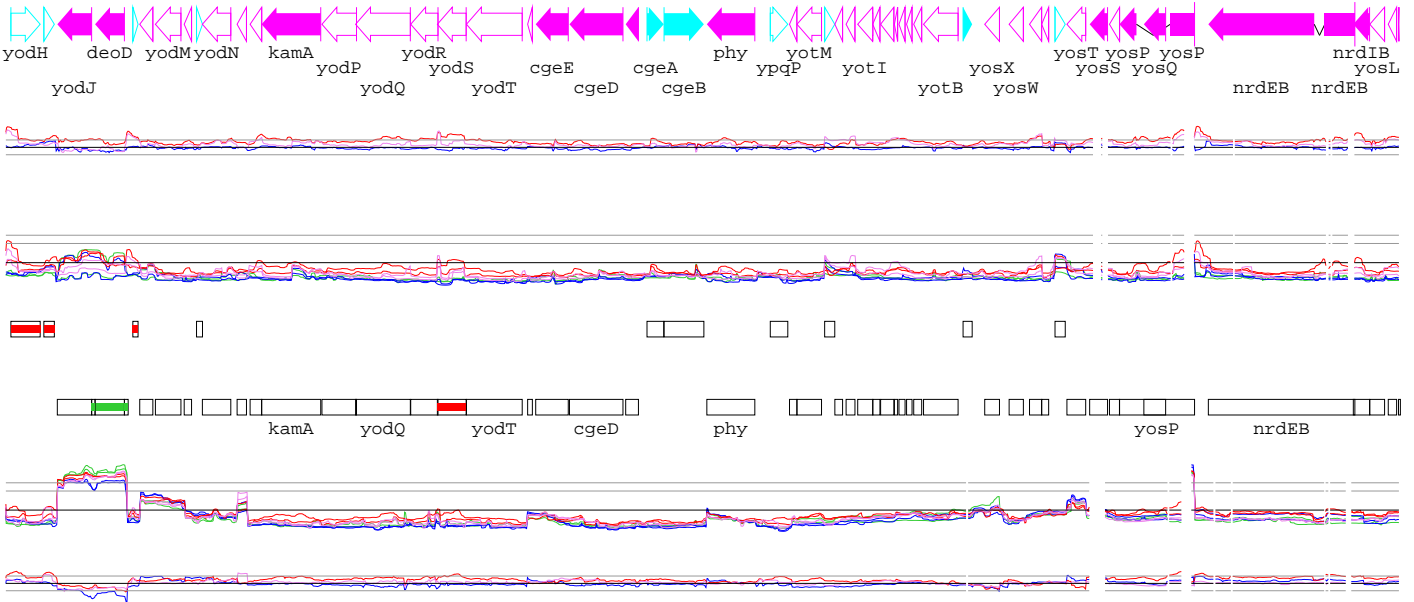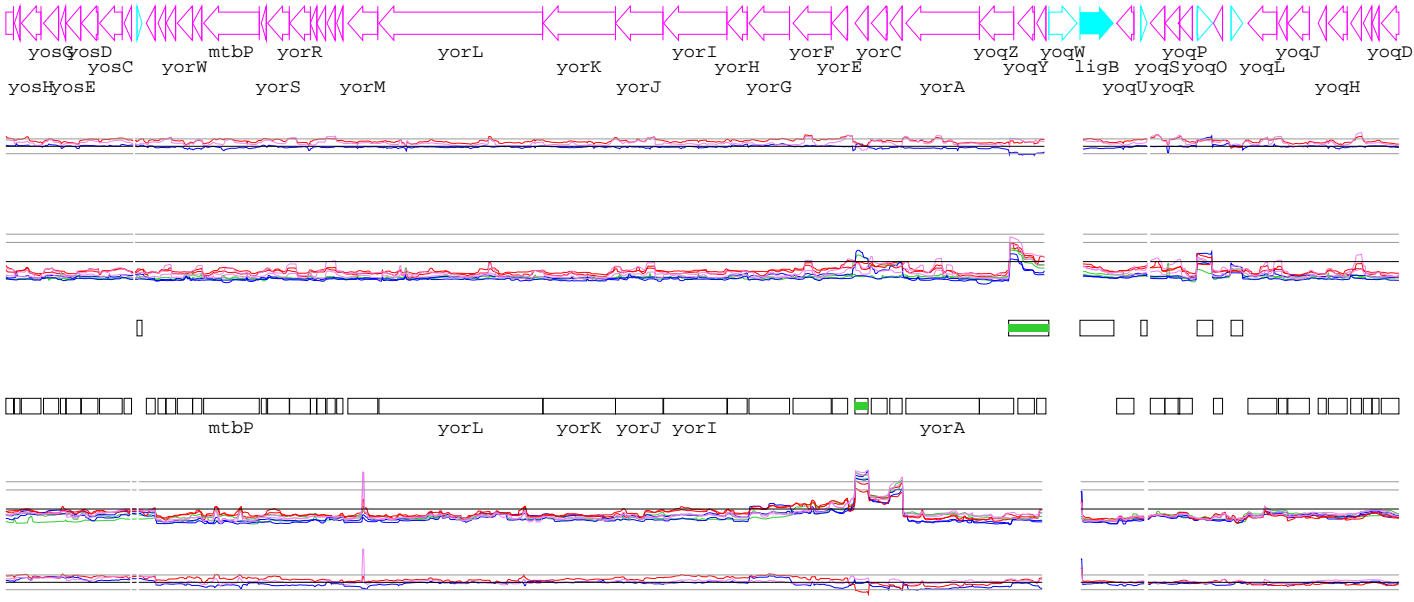

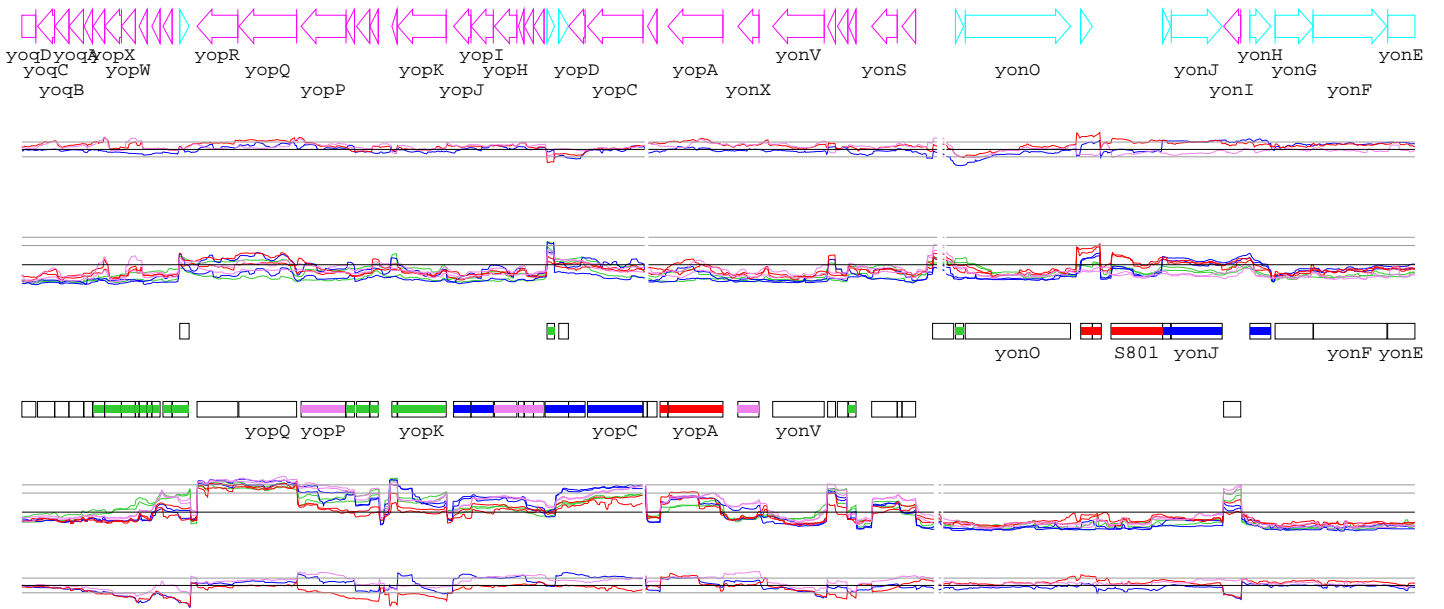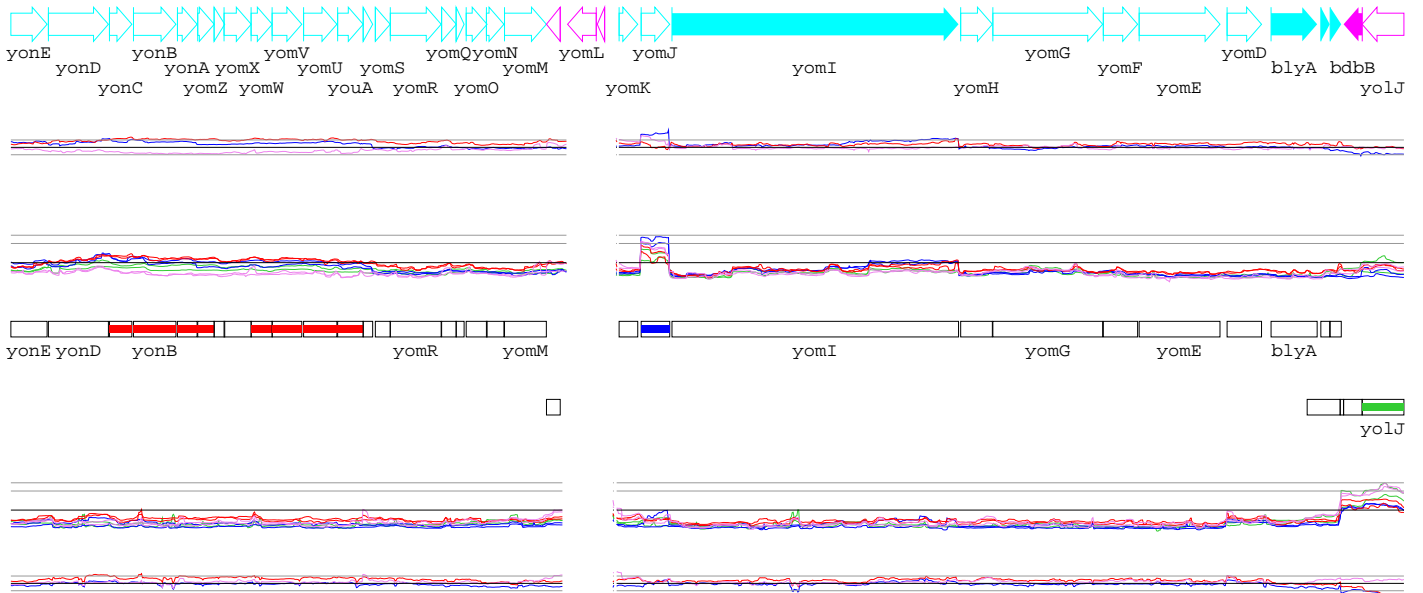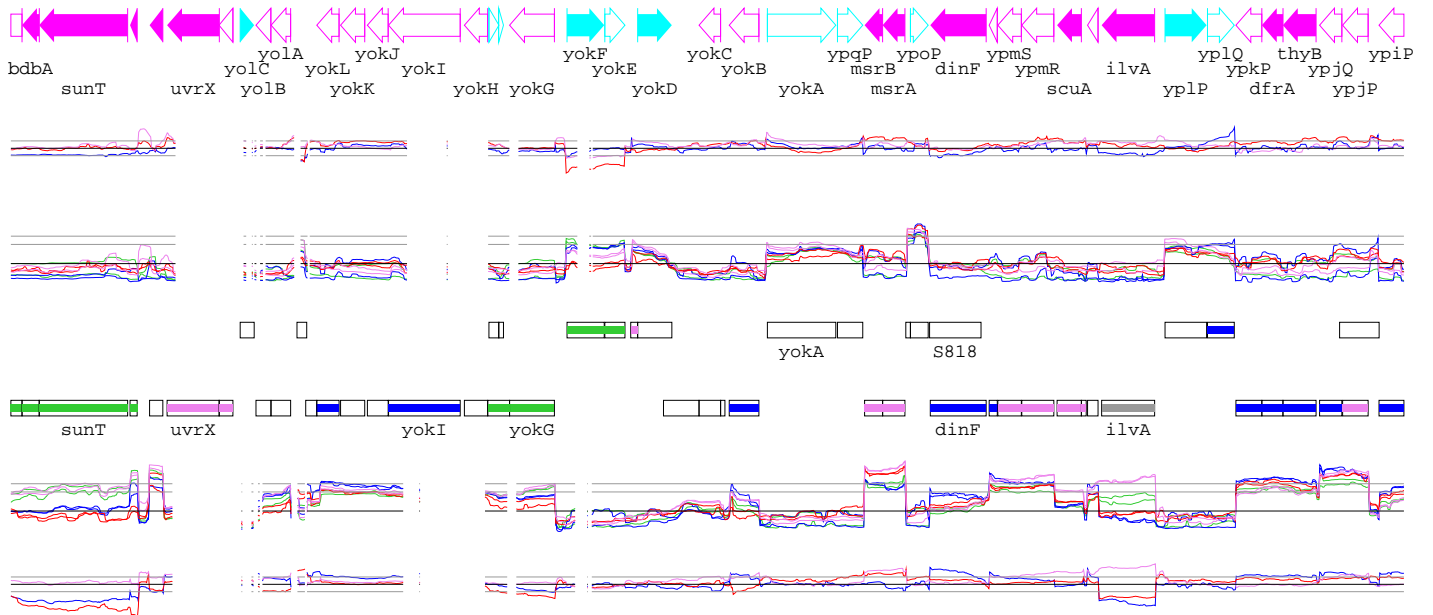

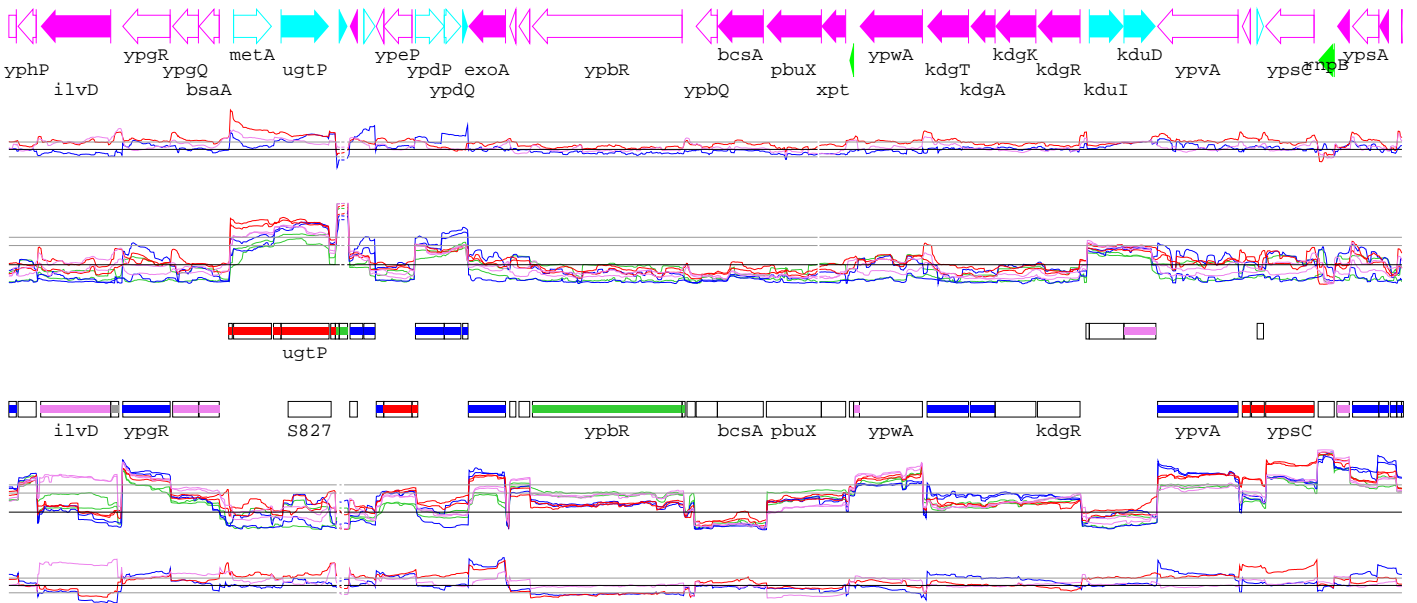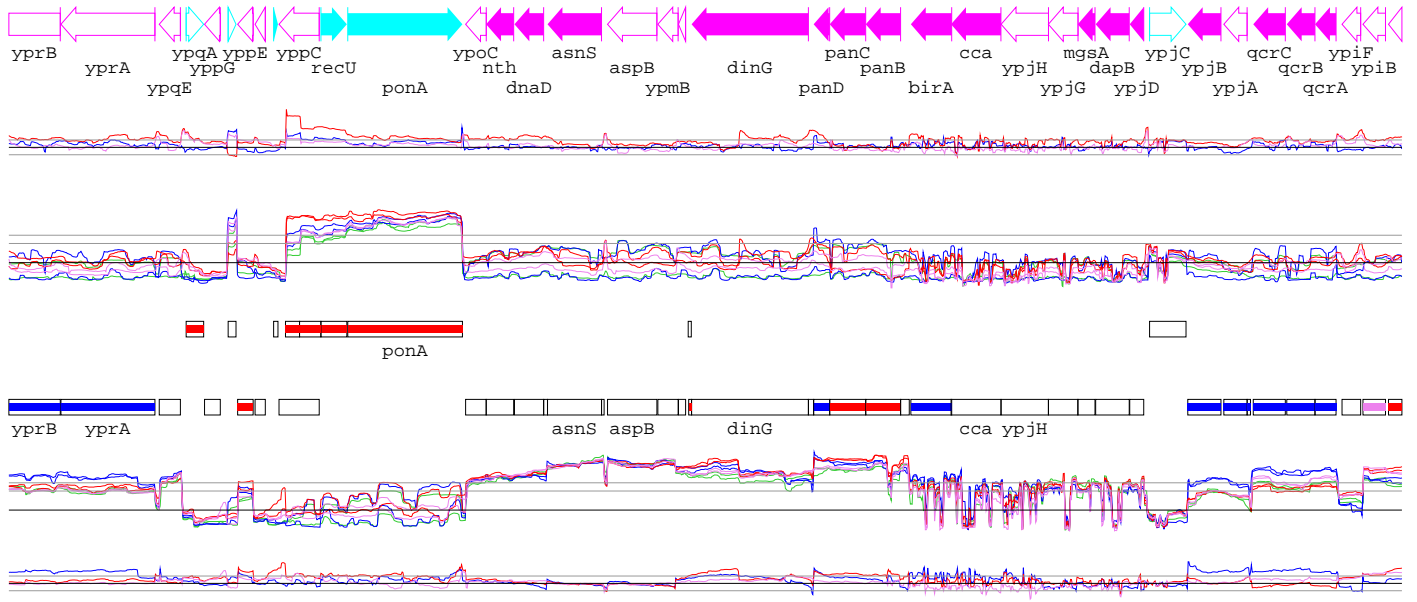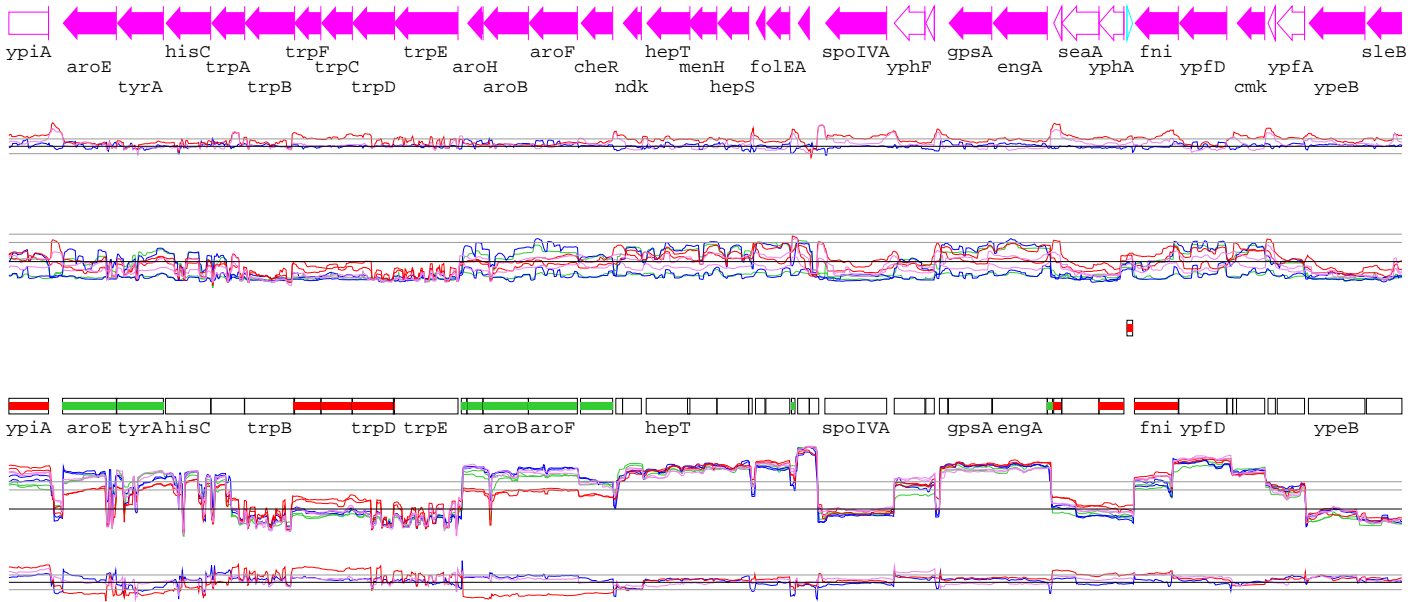



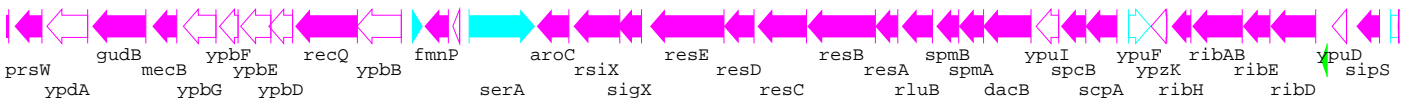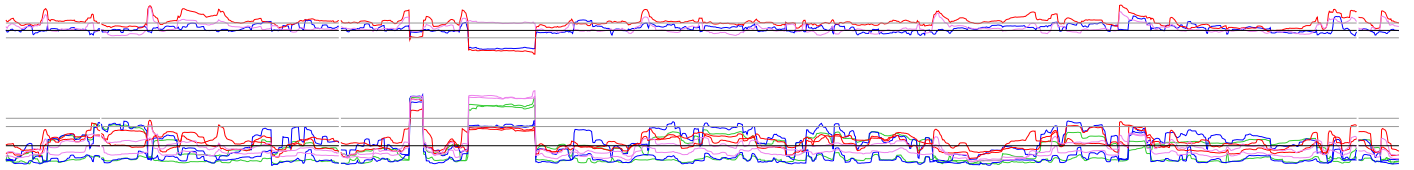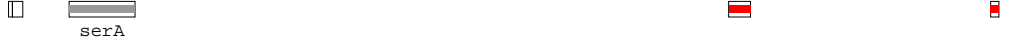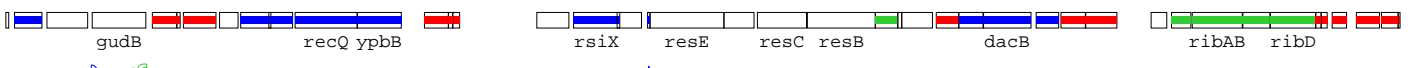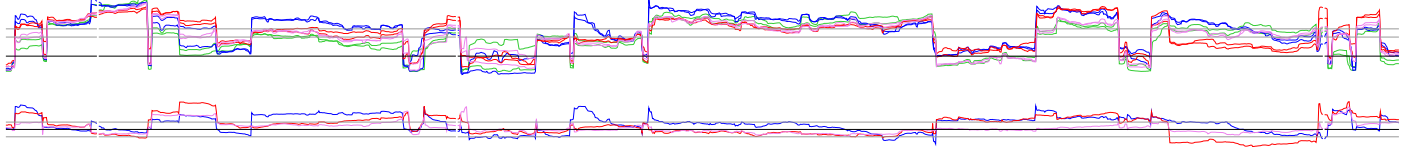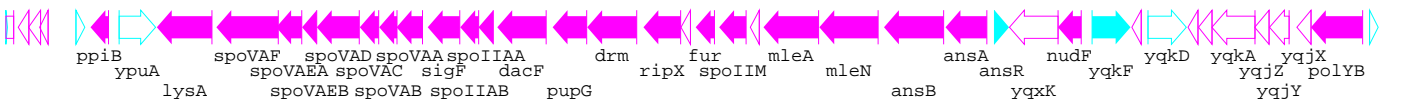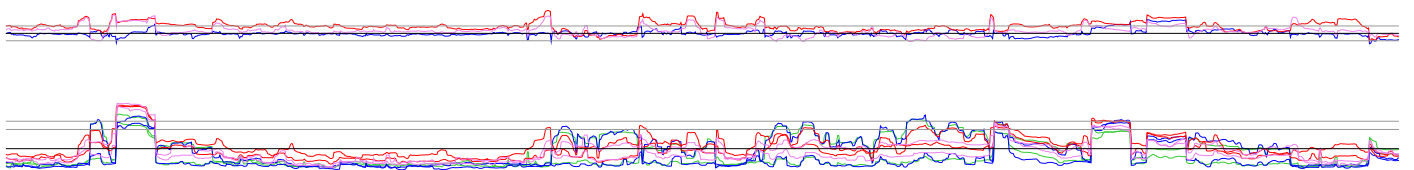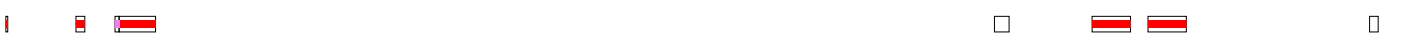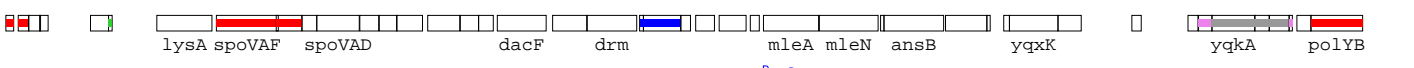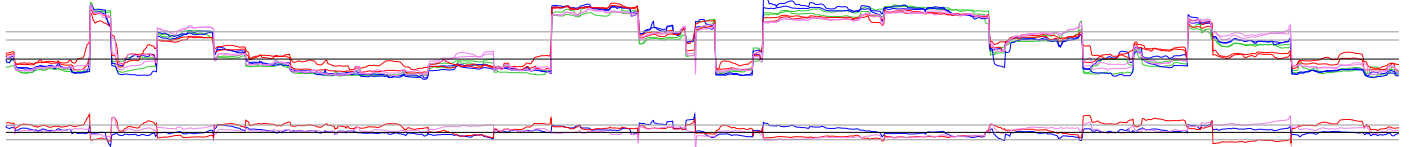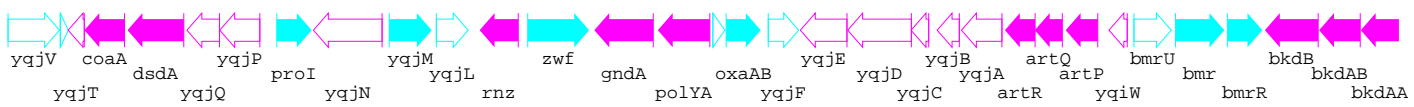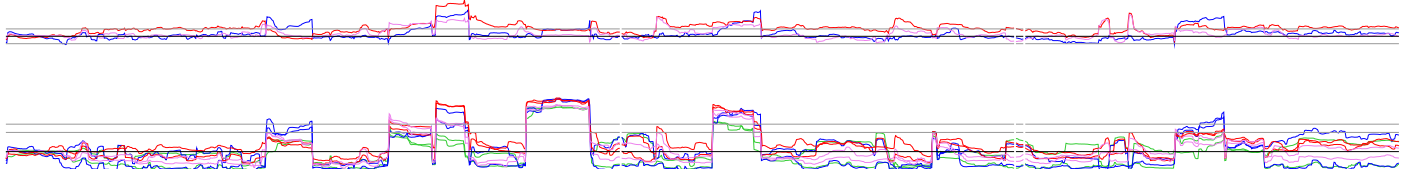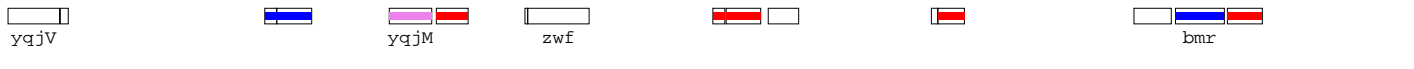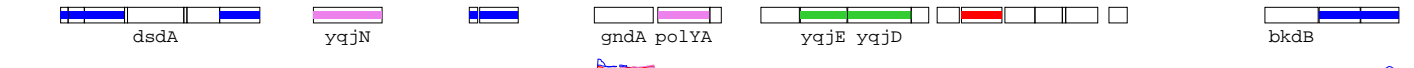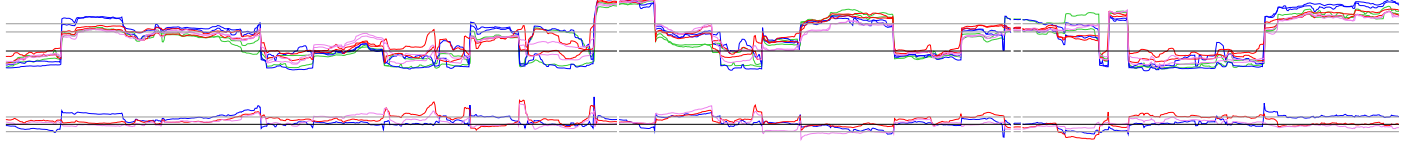

2 500 001

2 533 334

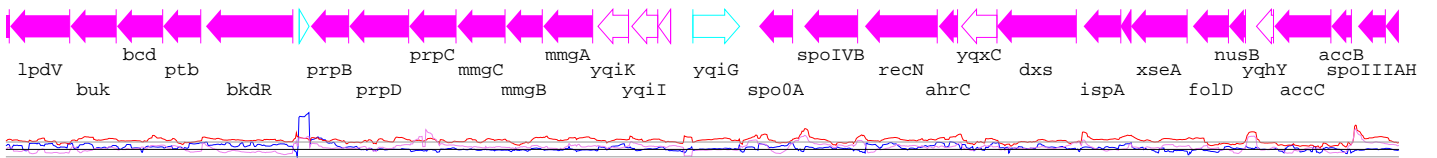

yqiG

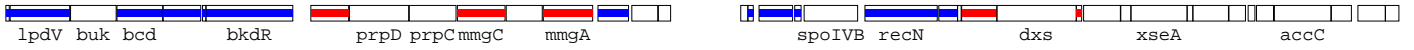

2 533 335

2 566 668

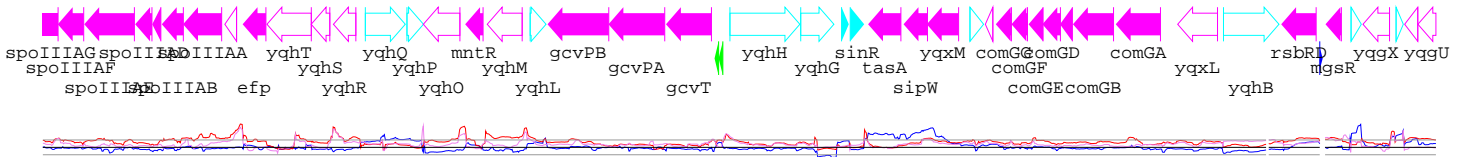

yqhH yqgB

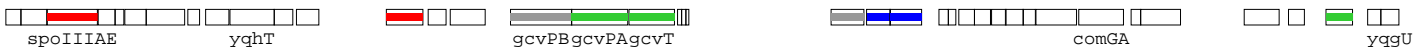

2 566 669

2 600 002

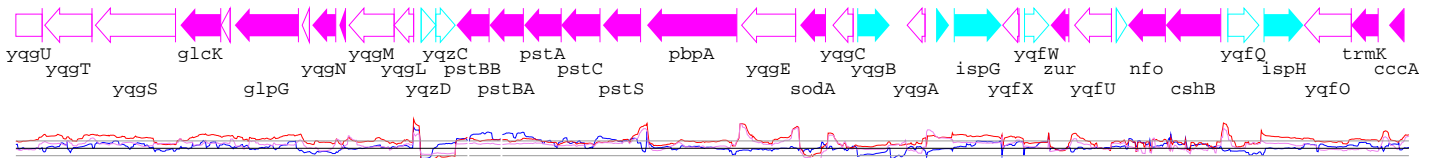

ispG

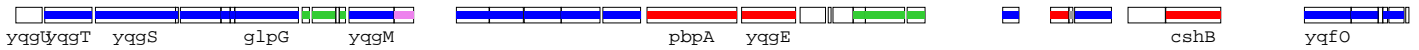

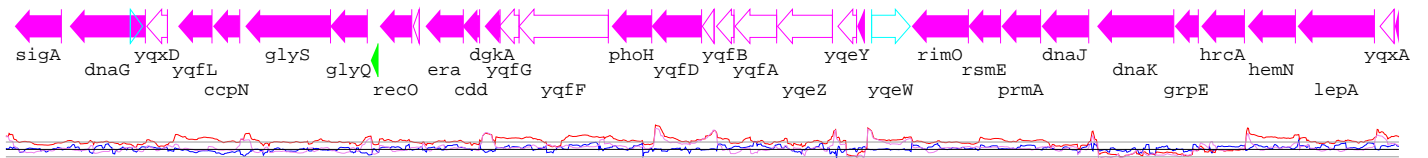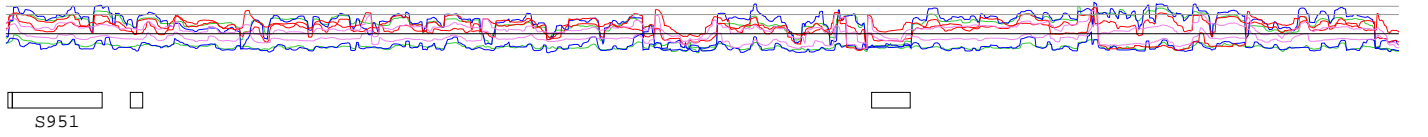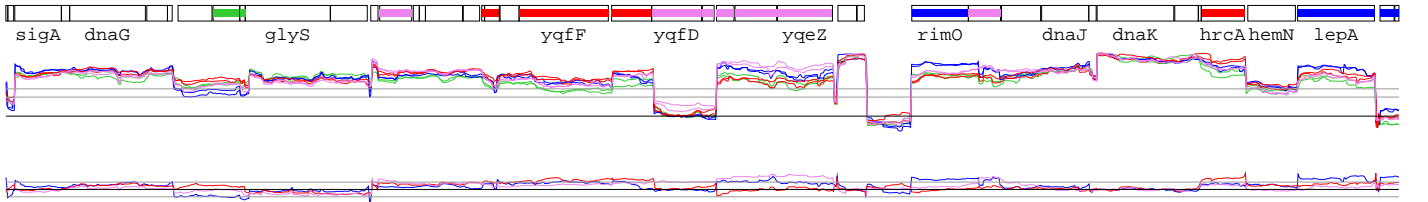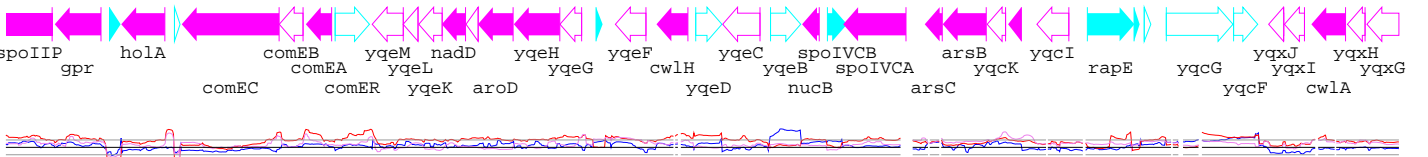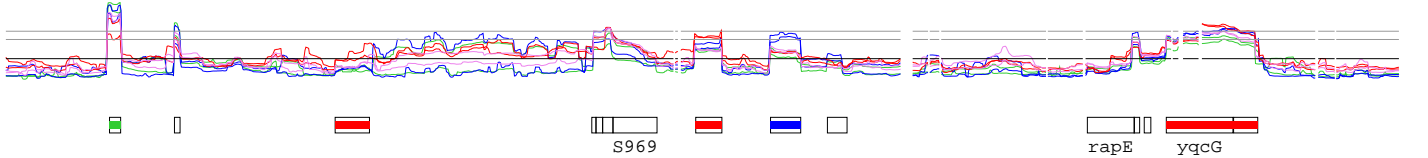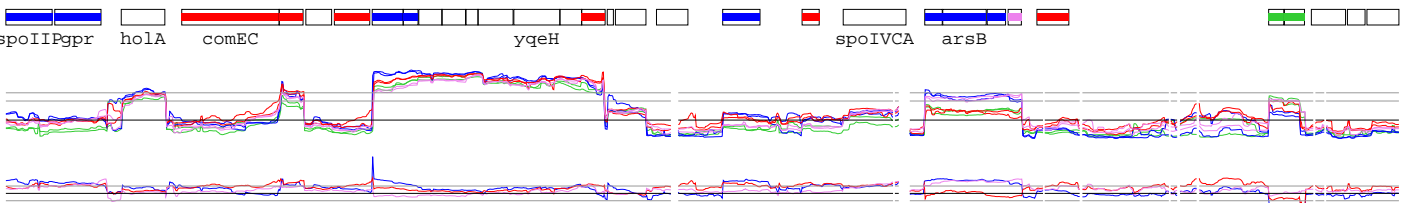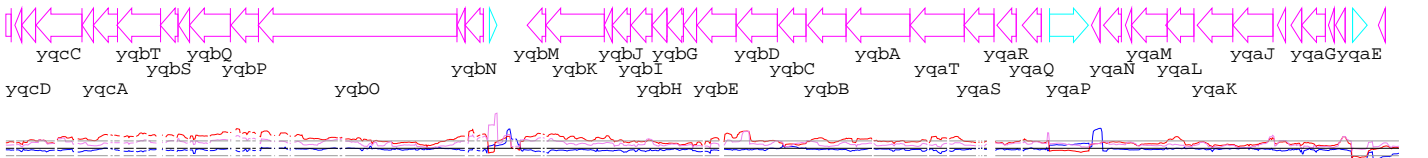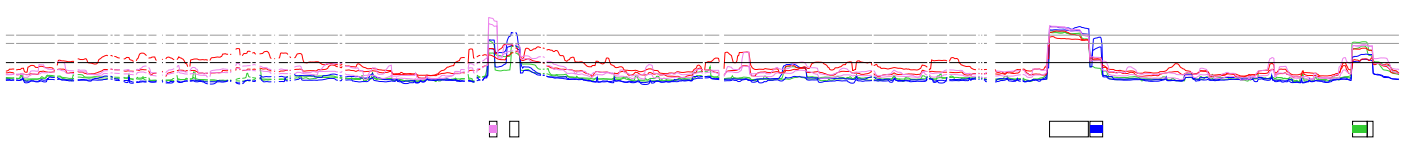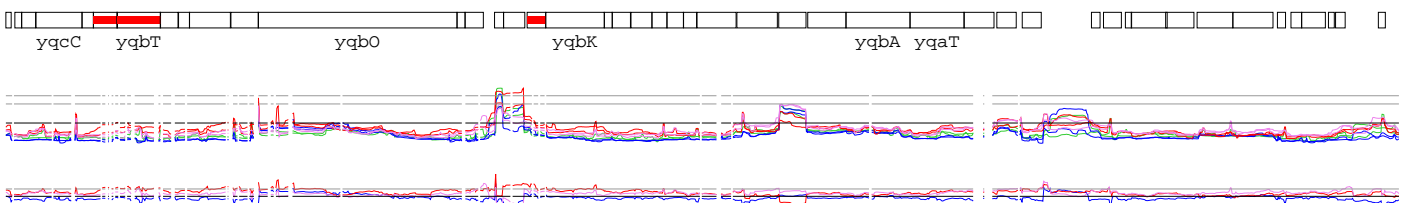

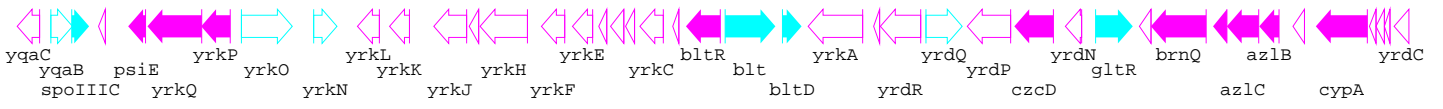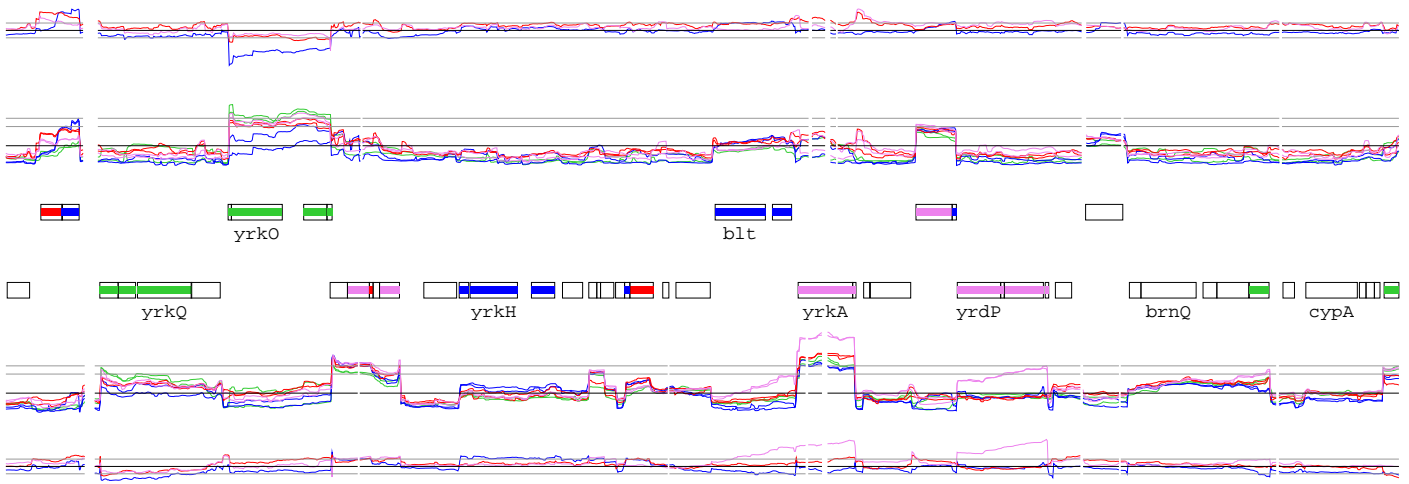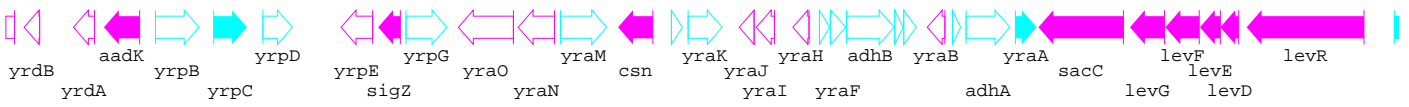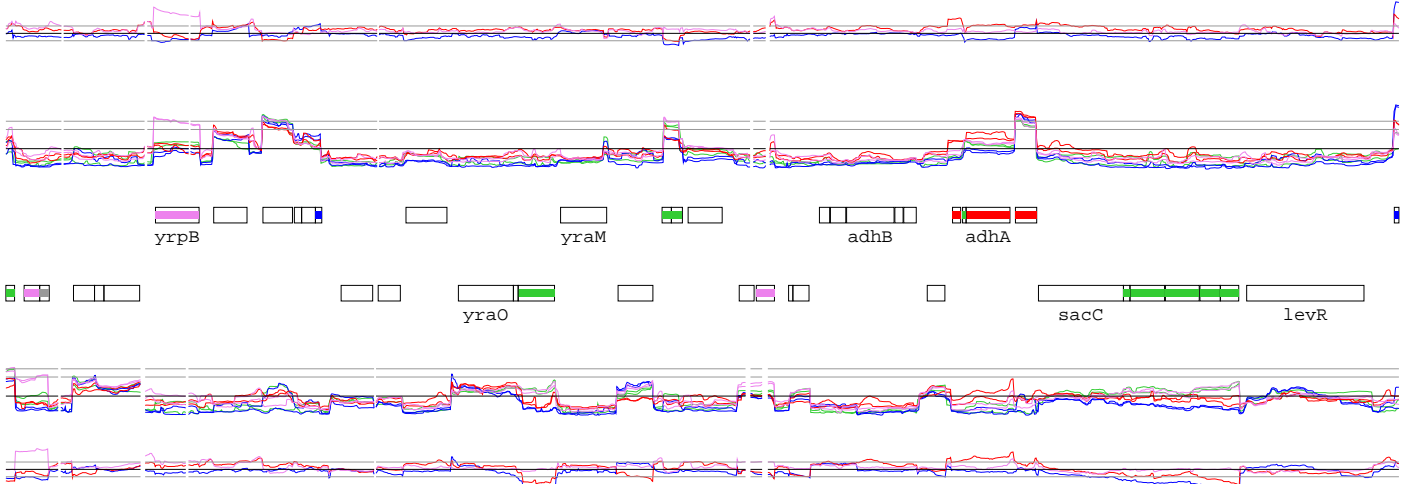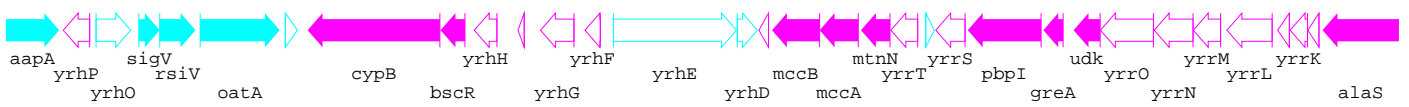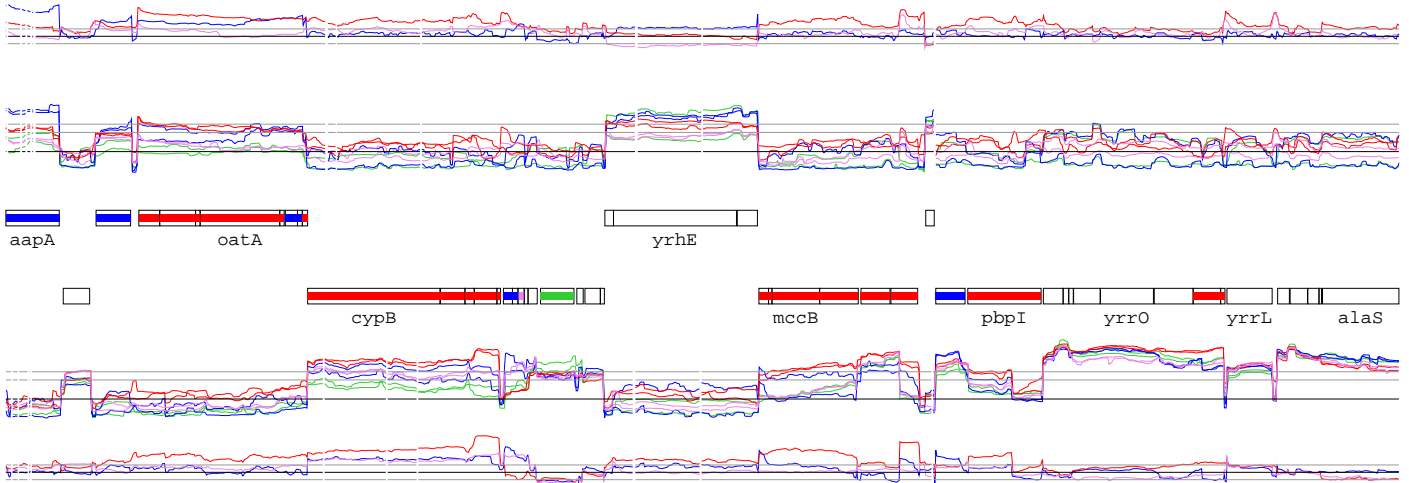

2 800 001

2 833 334

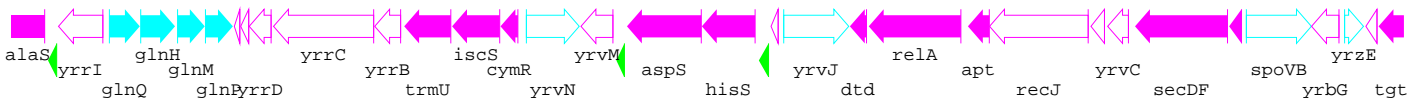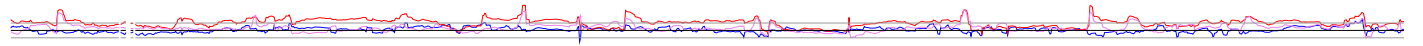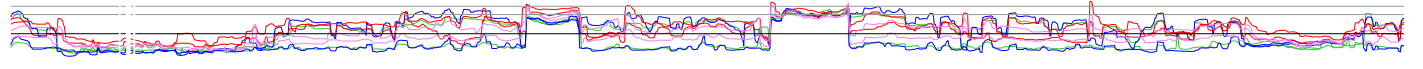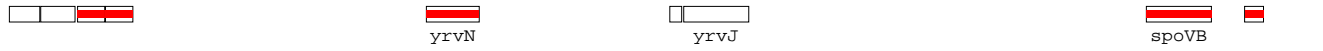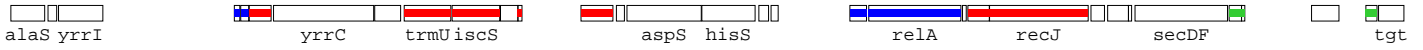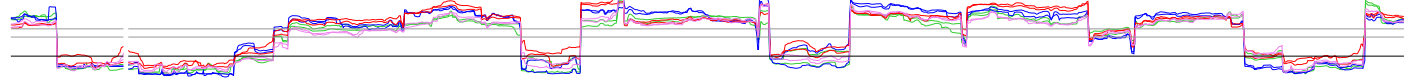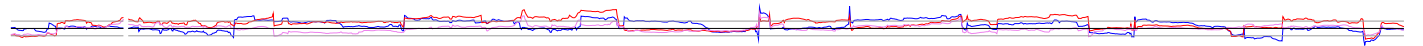

2 833 335

2 866 668

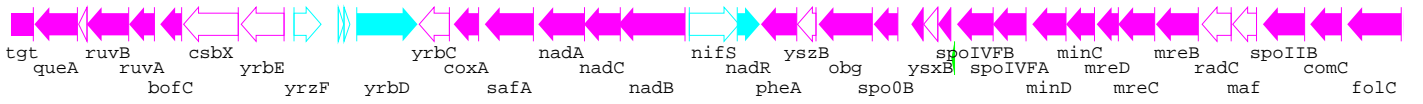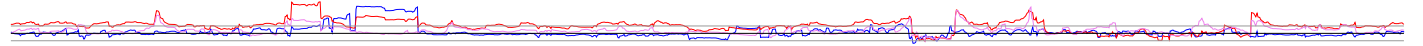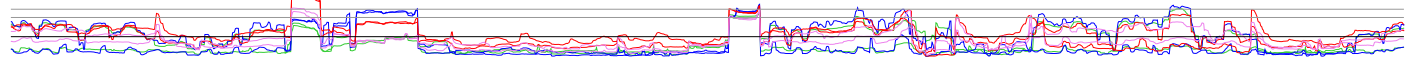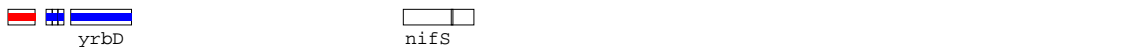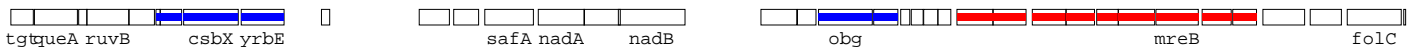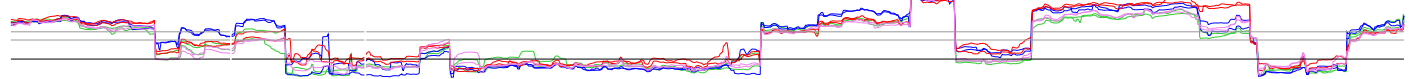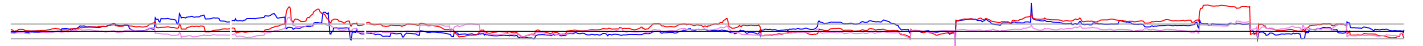

2 866 669

2 900 002

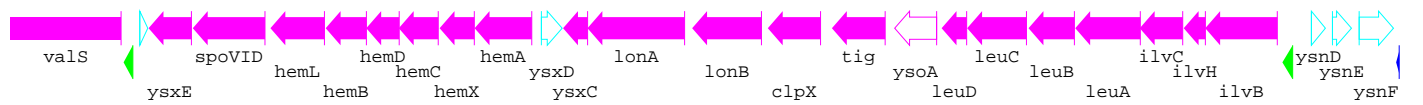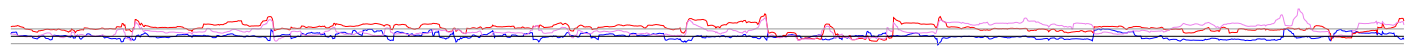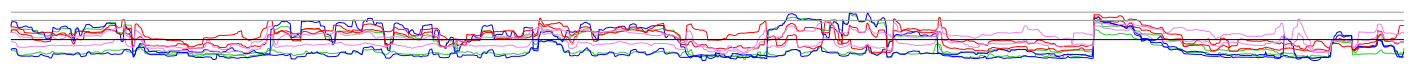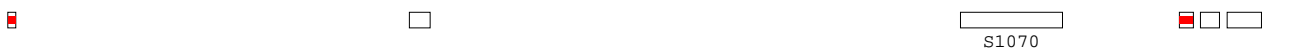

S1070

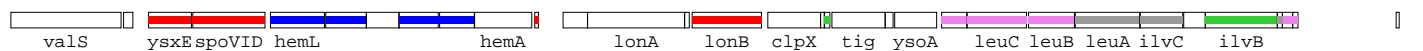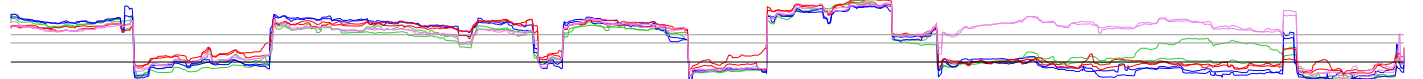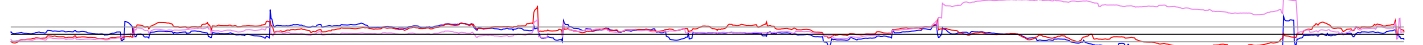

2 900 001

2 933 334

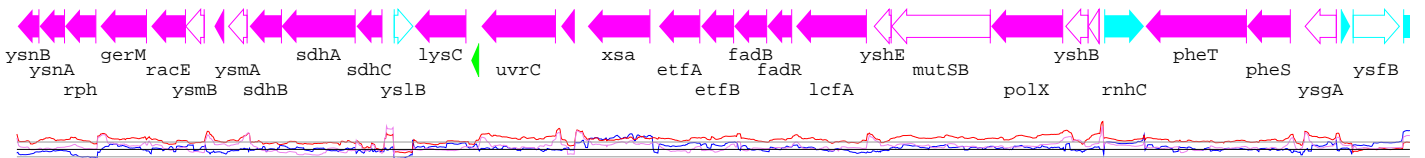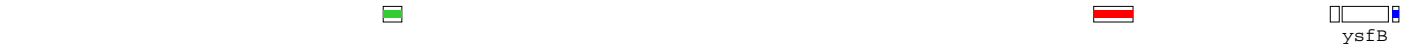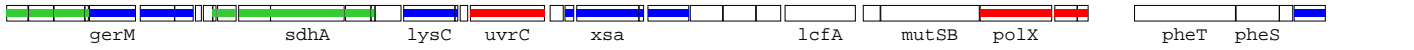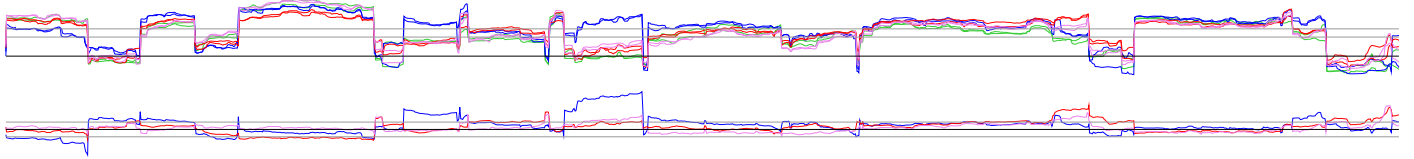

2 933 335

2 966 668

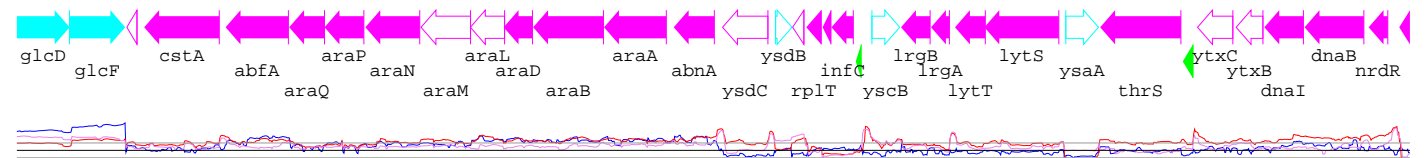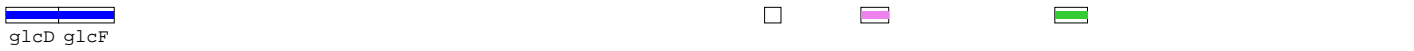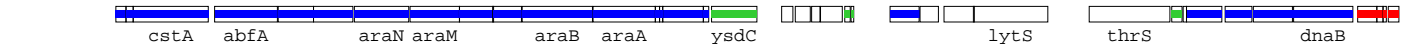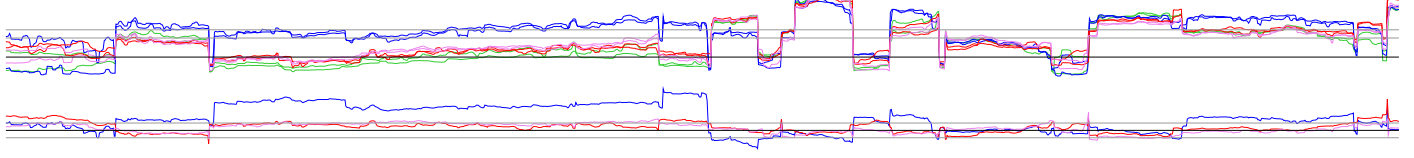

2 966 669

3 000 002

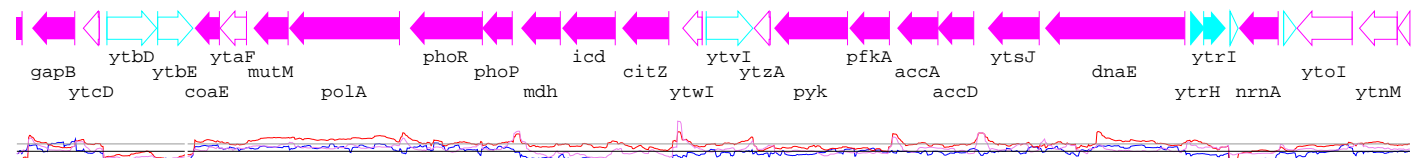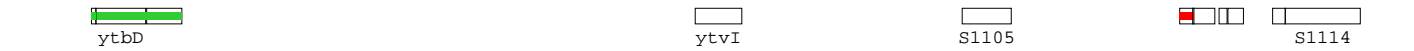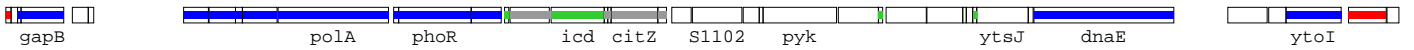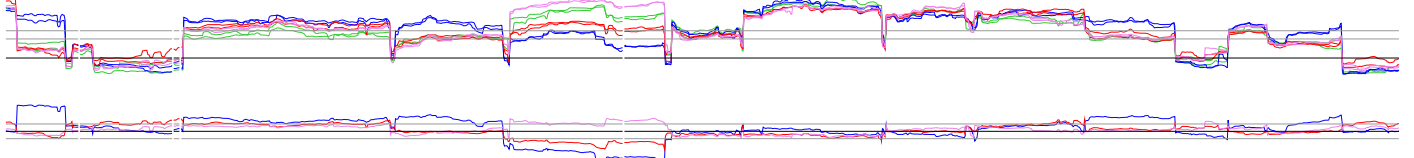

3 000 001

3 033 334

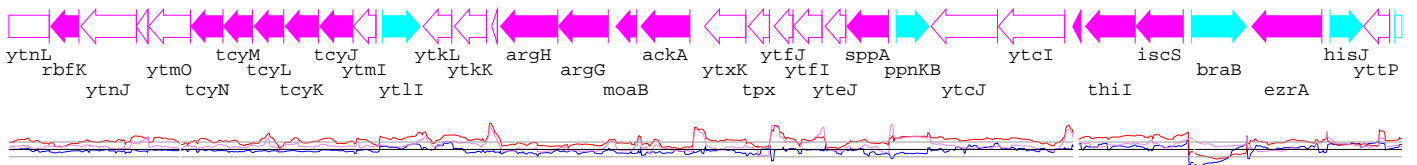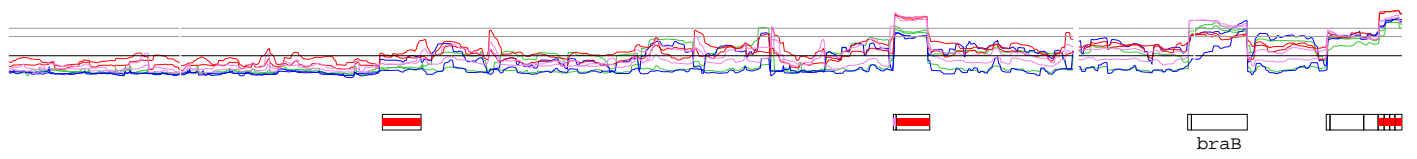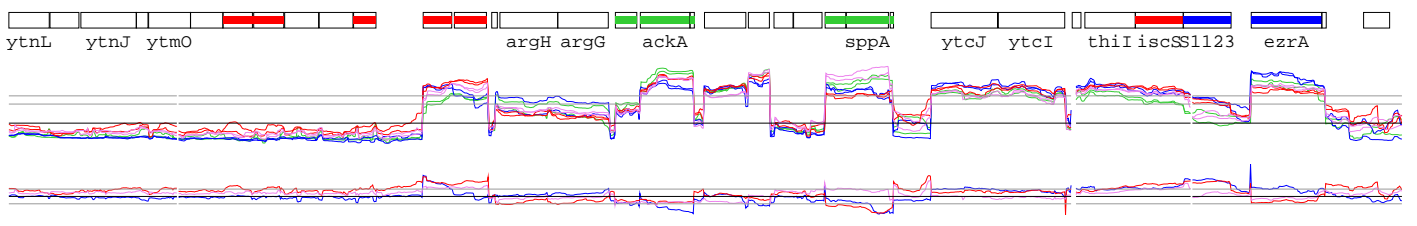

3 033 335

3 066 668

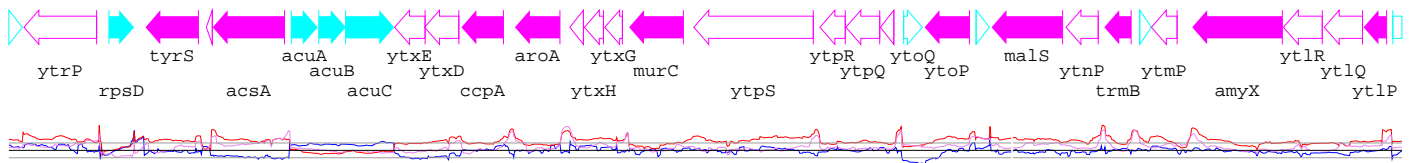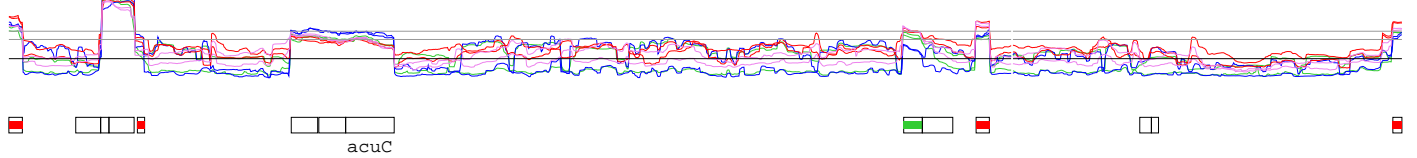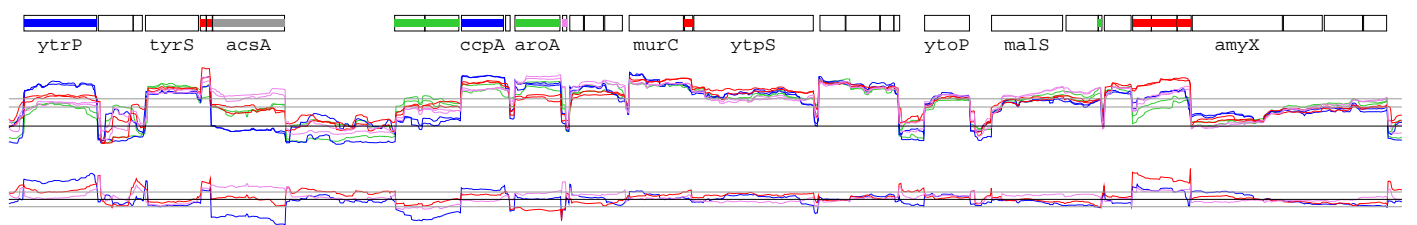

3 066 669

3 100 002

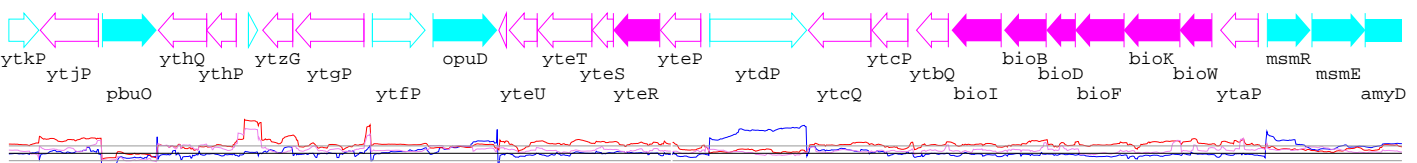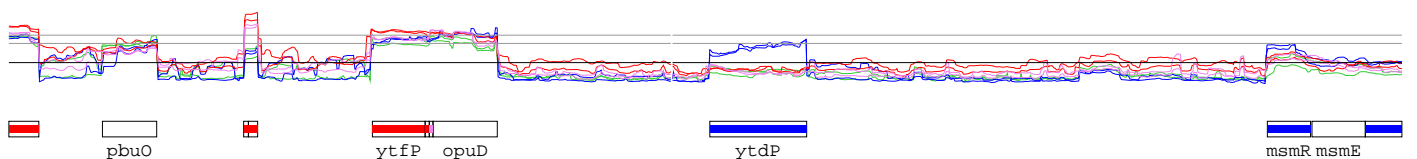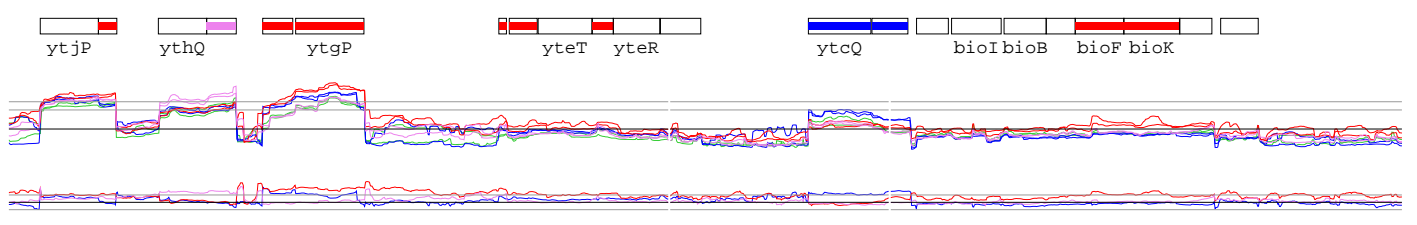

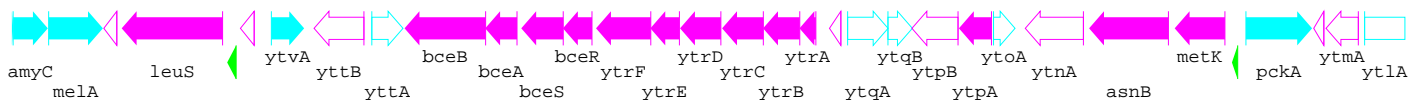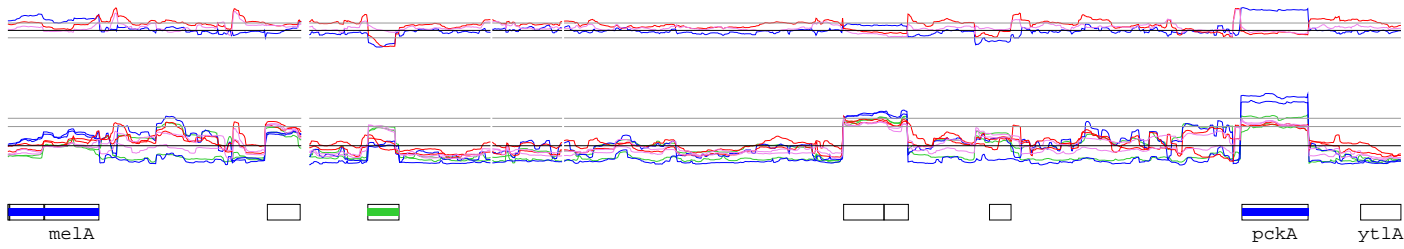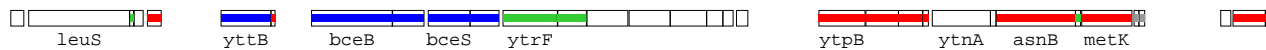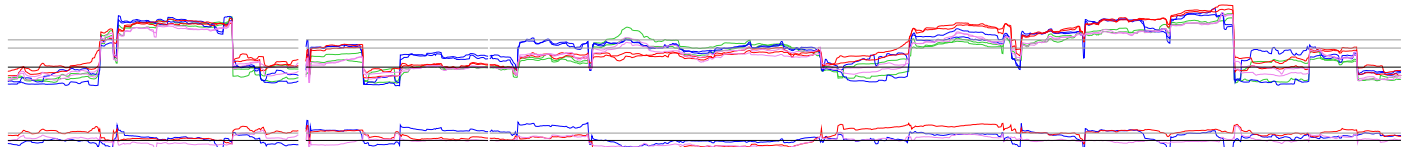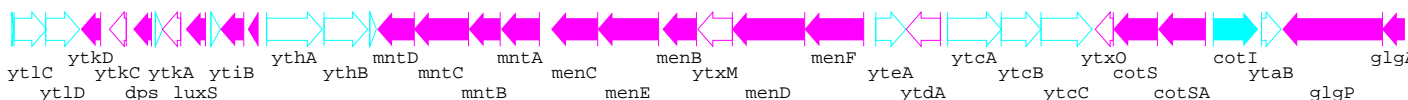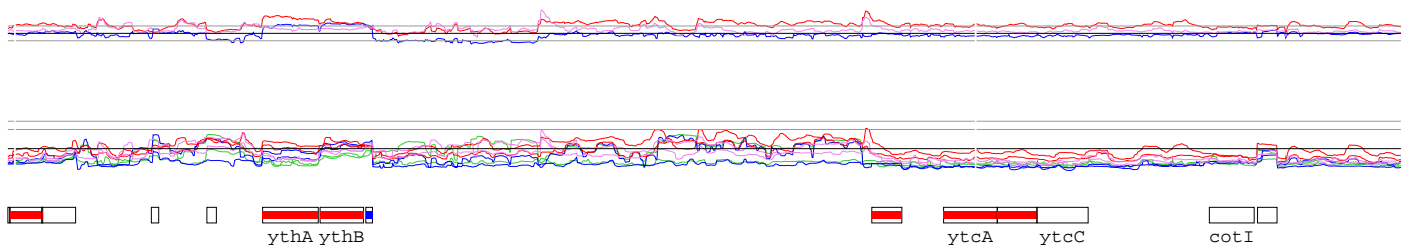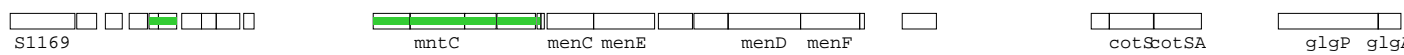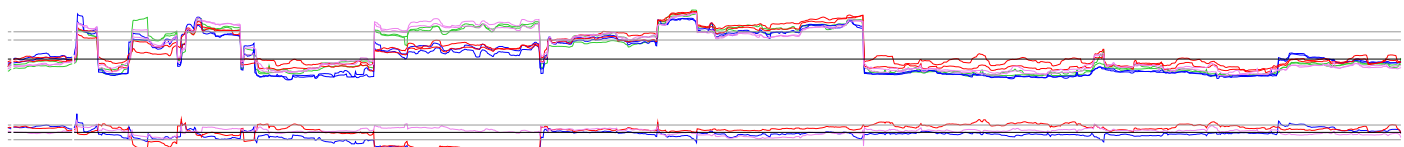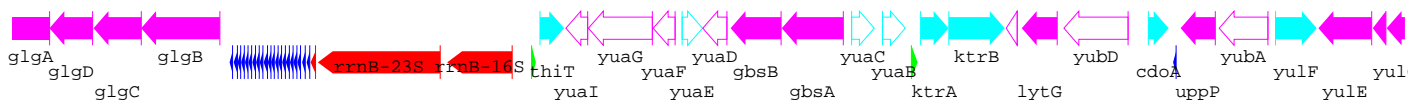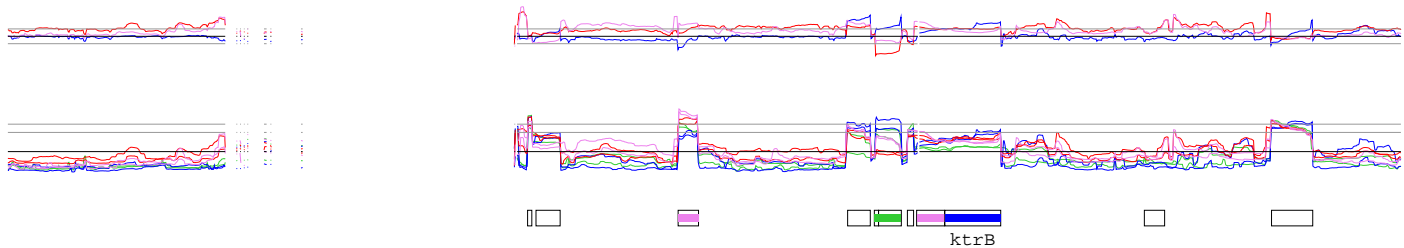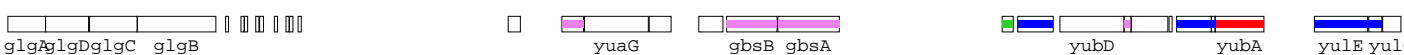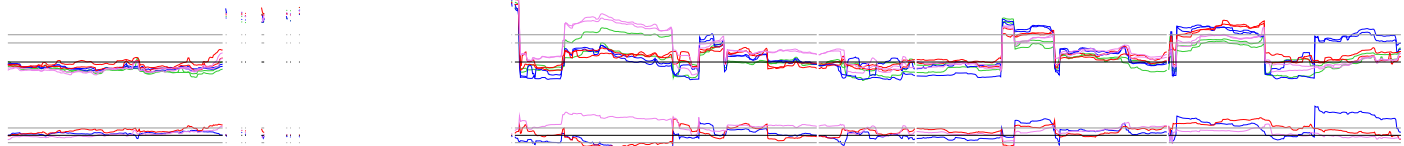



3 200 001

3 233 334

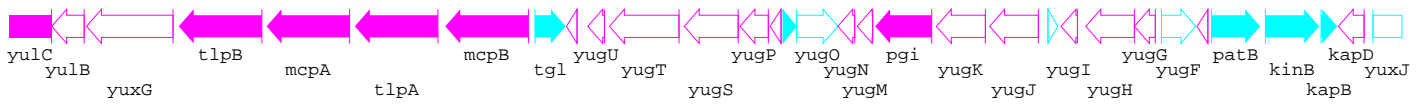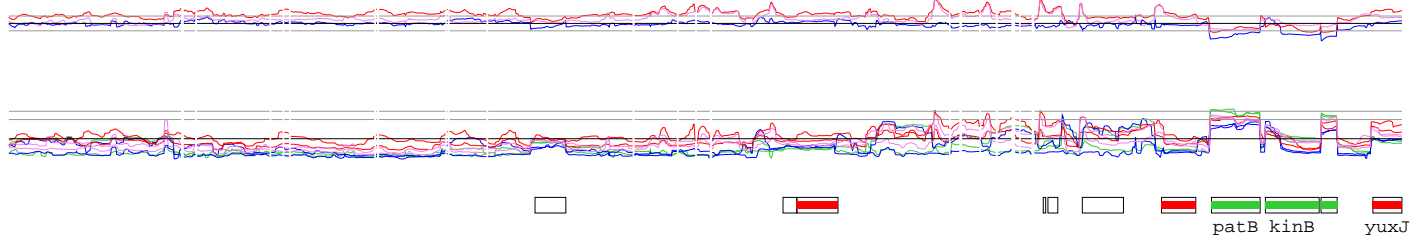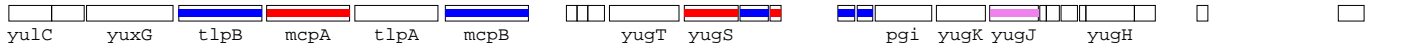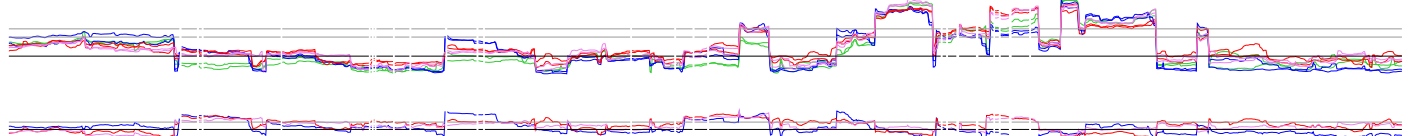

3 233 335

3 266 668

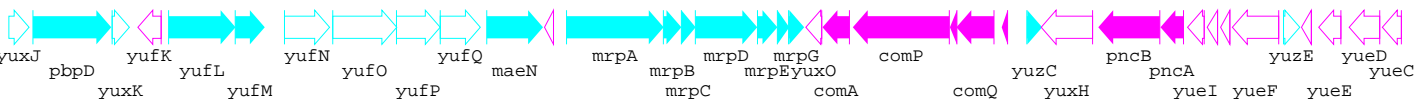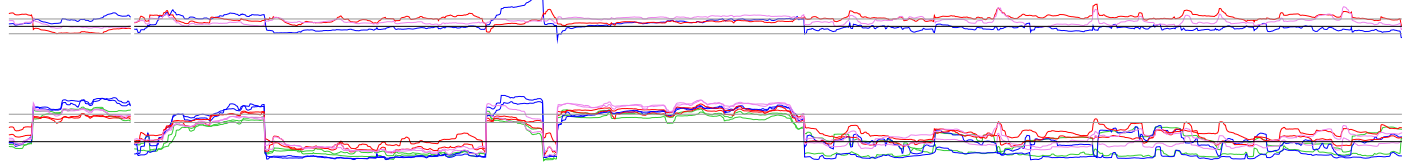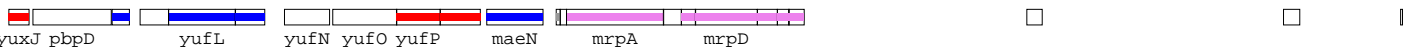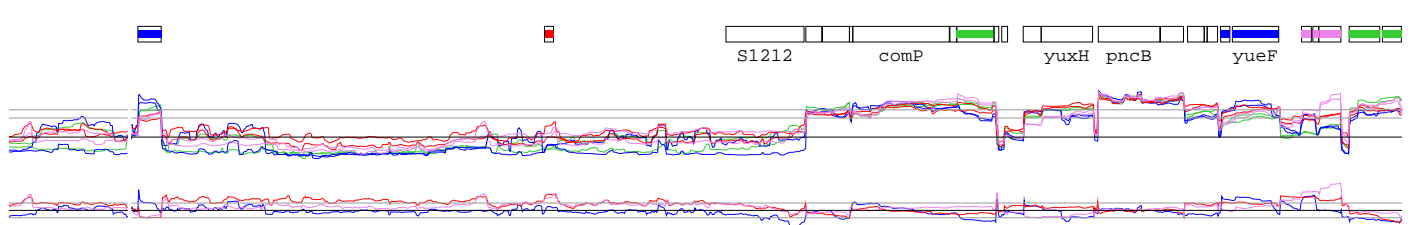

3 266 669

3 300 002

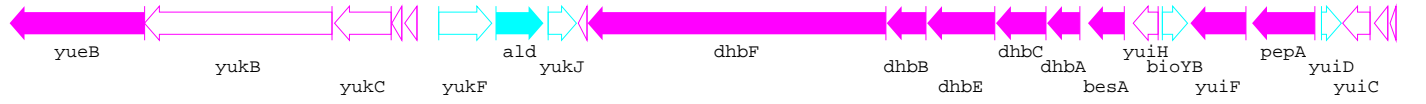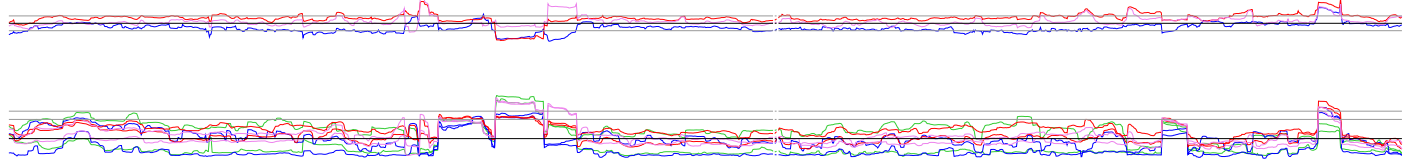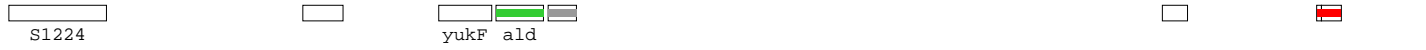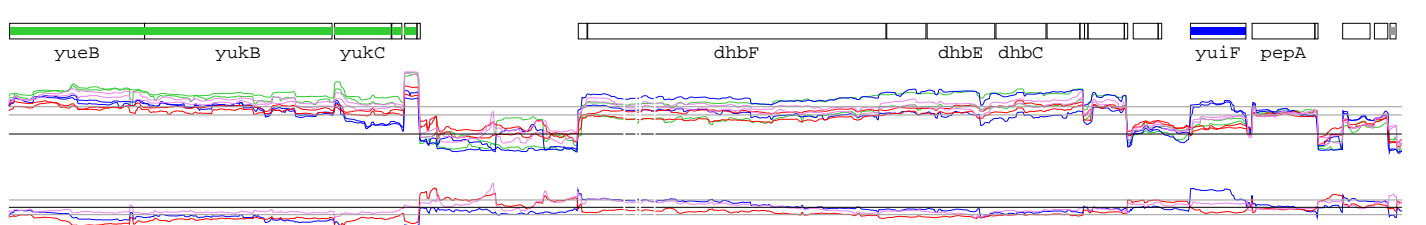

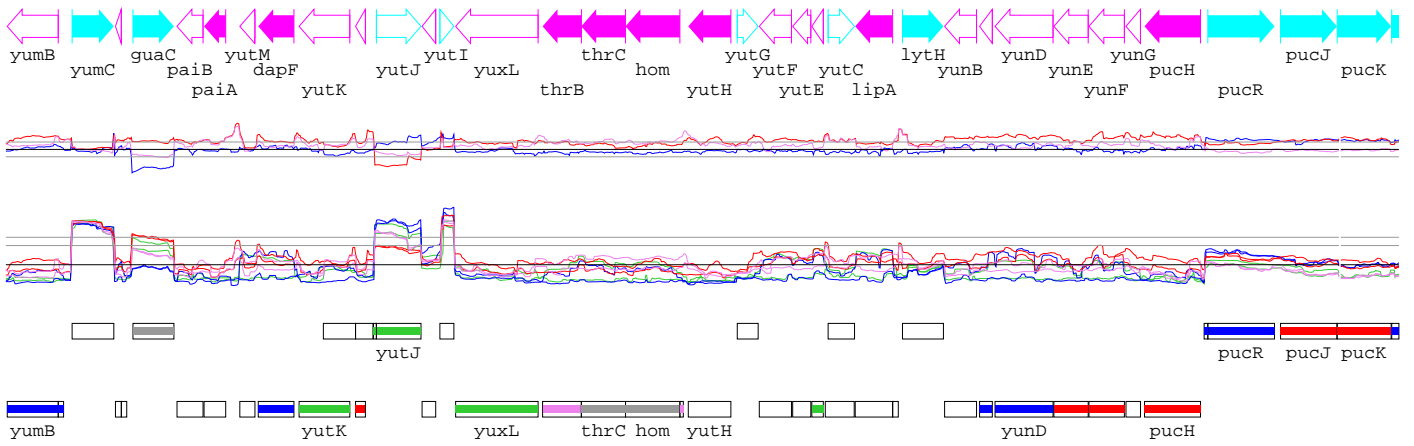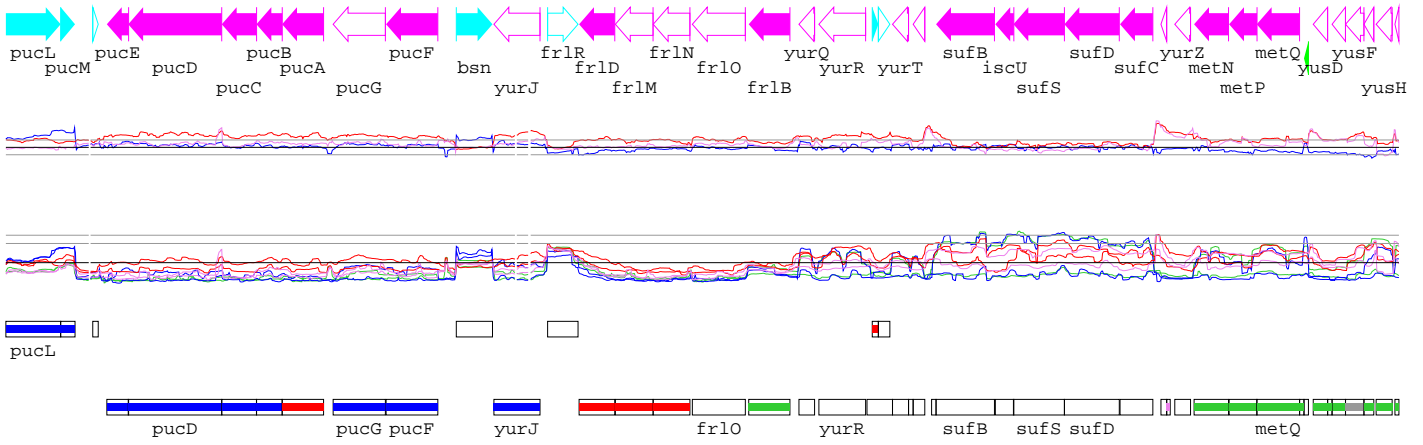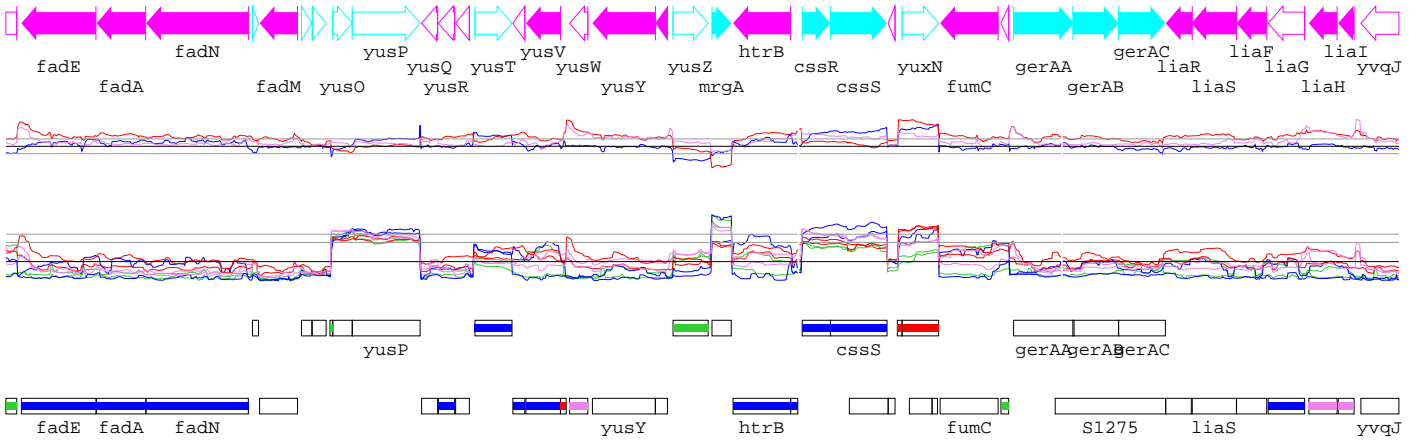



3 500 001

3 533 334

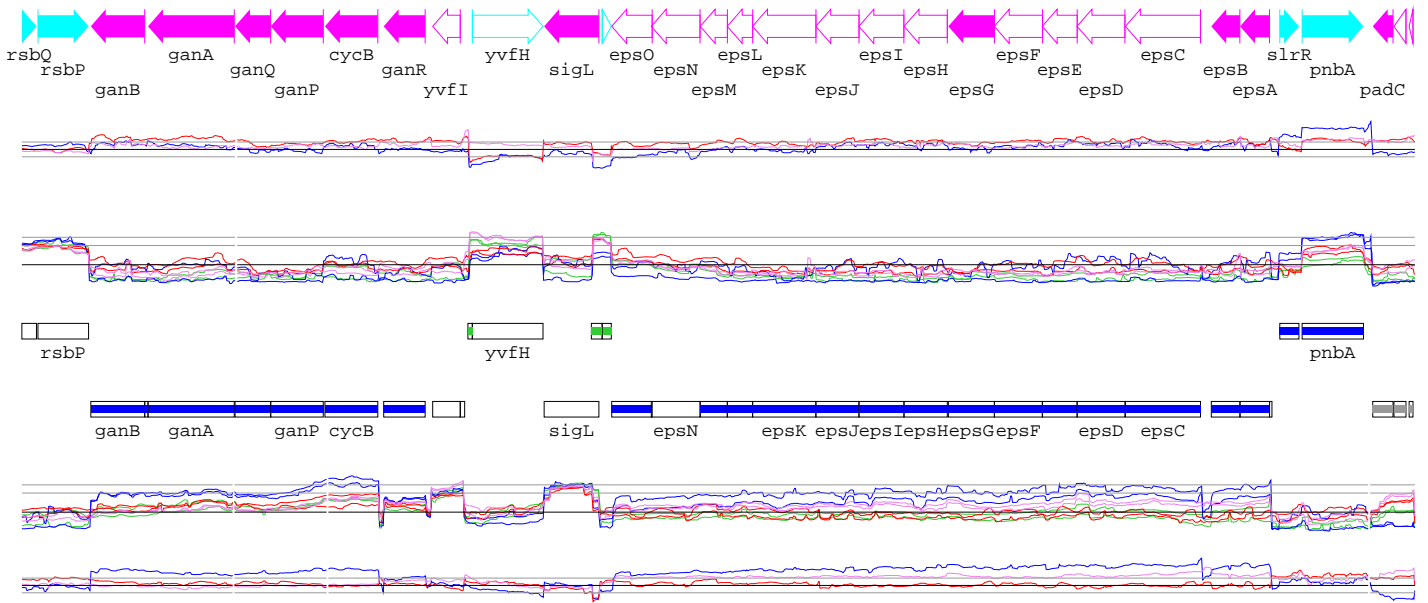

3 533 335

3 566 668

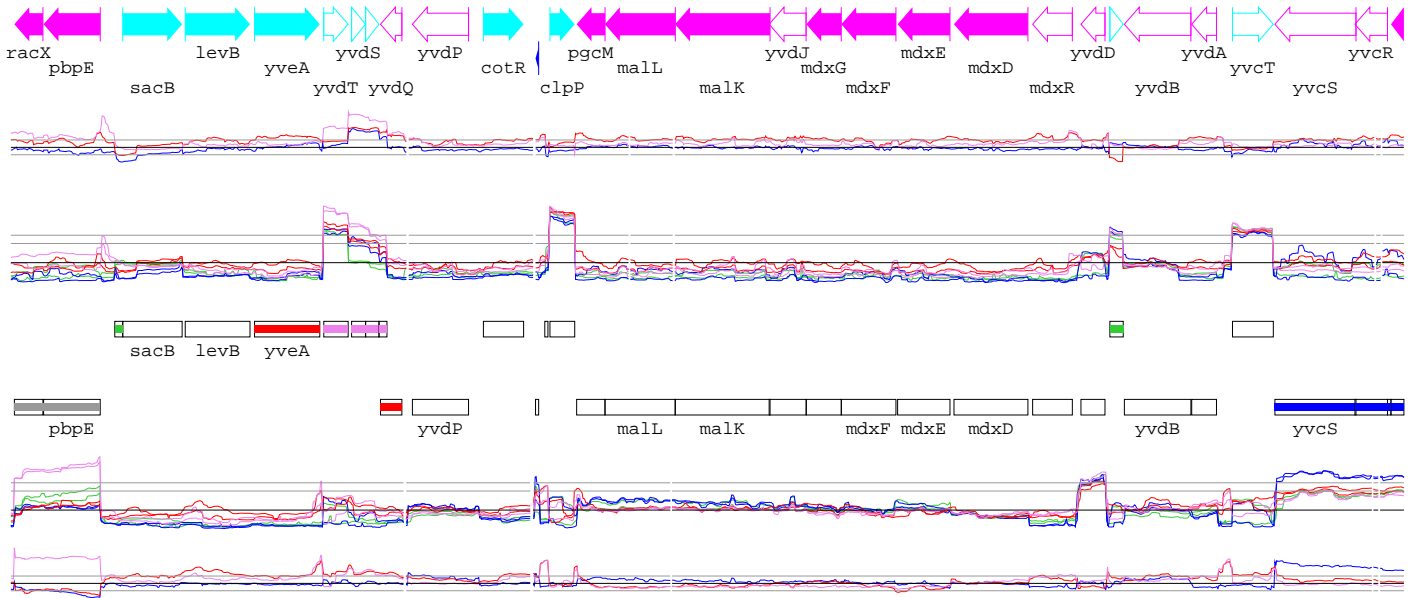

3 566 669

3 600 002

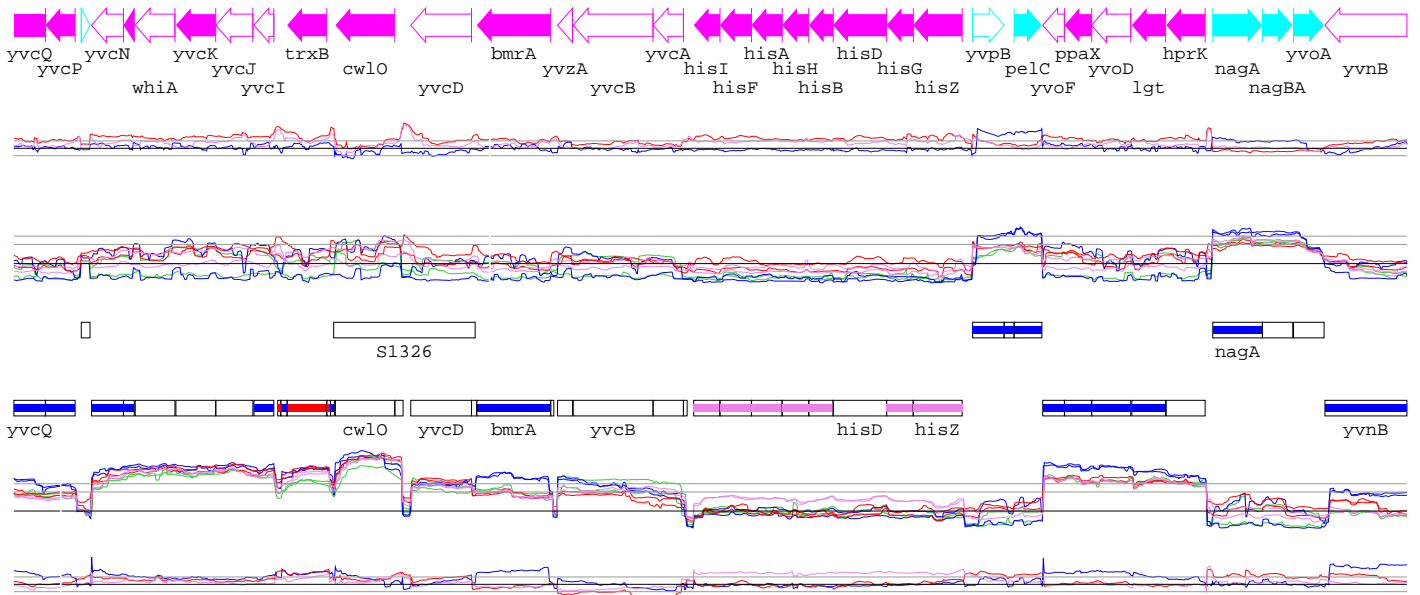

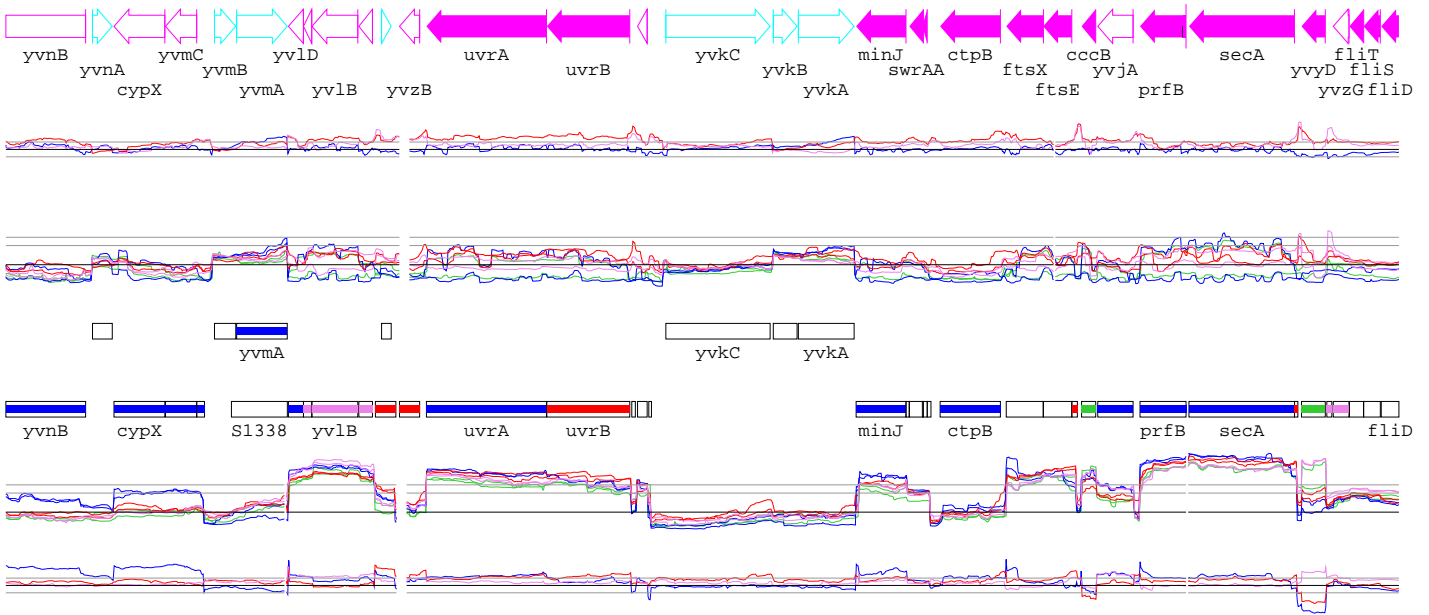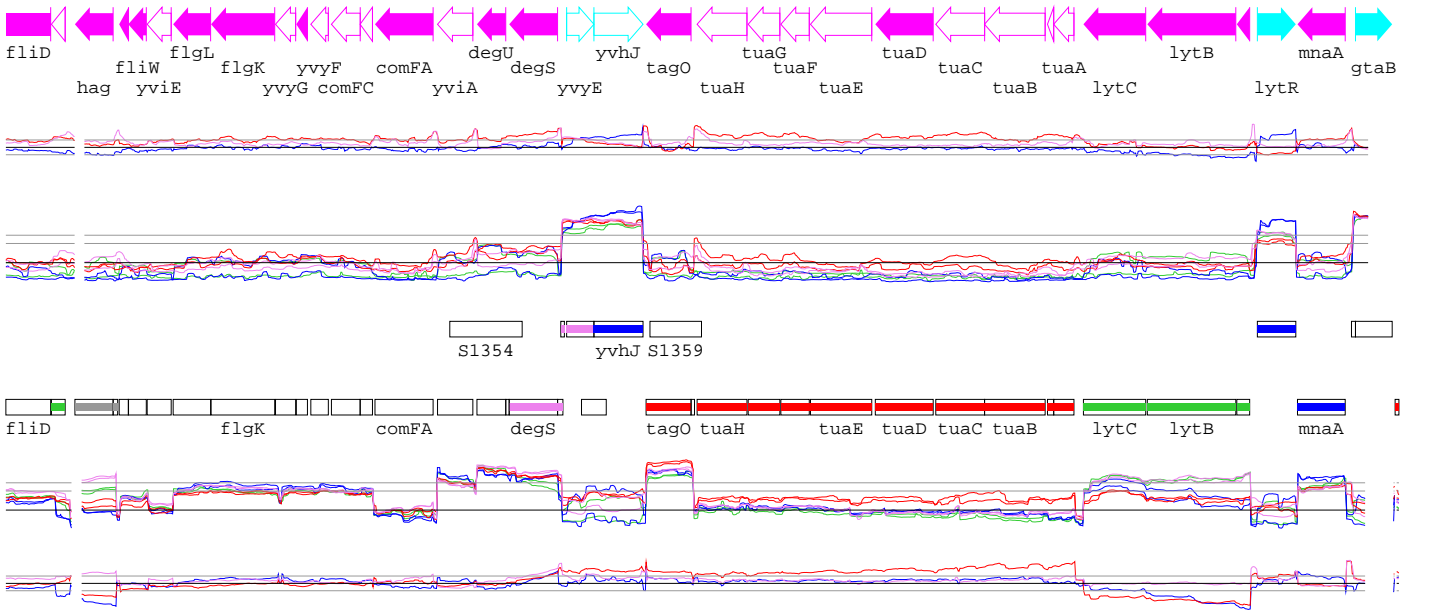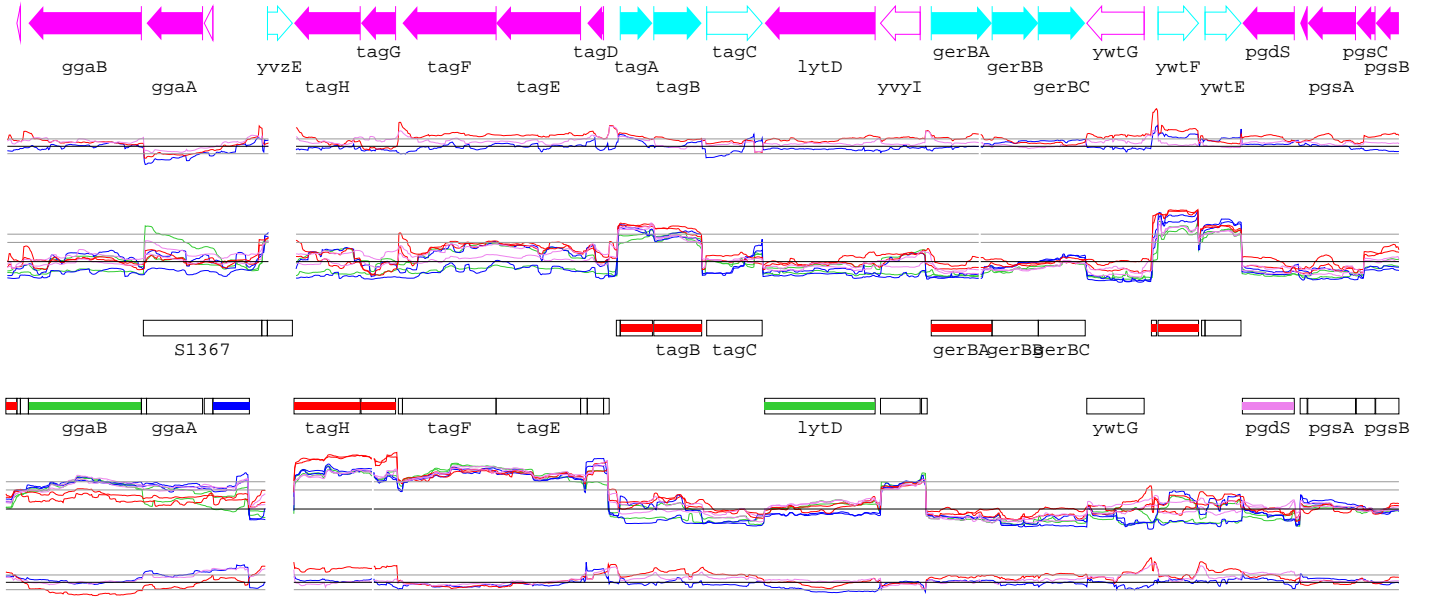

3 700 001

3 733 334

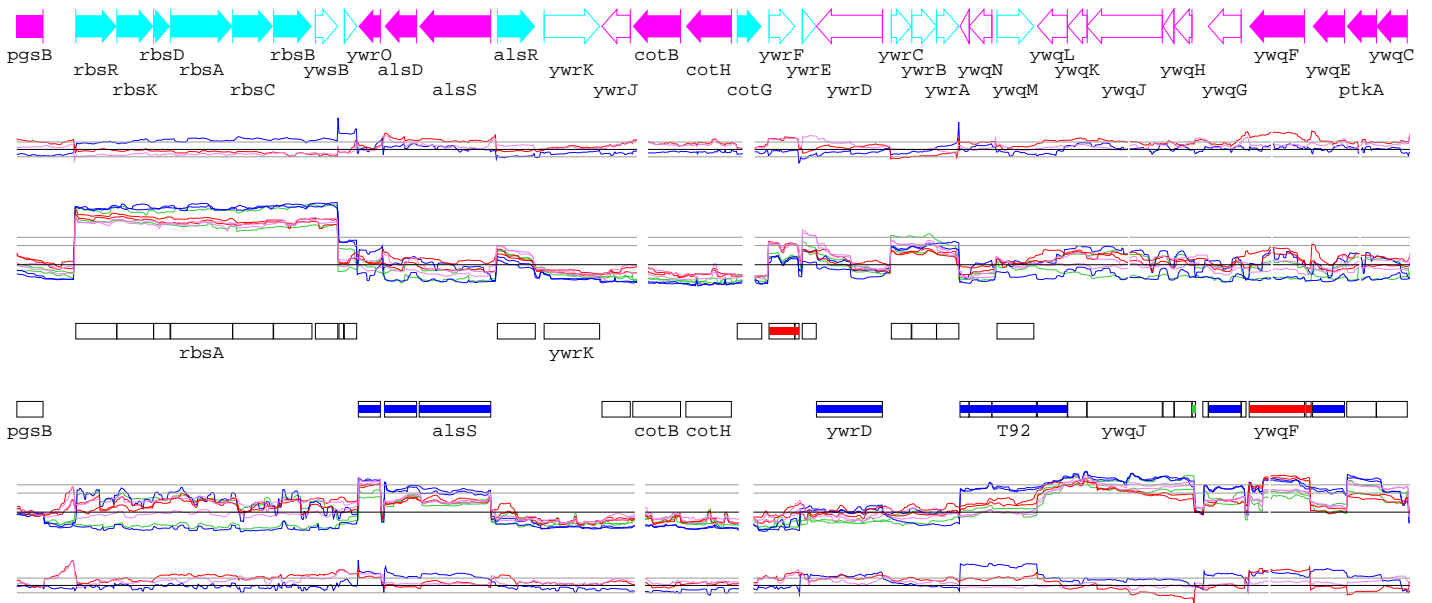

3 733 335

3 766 668

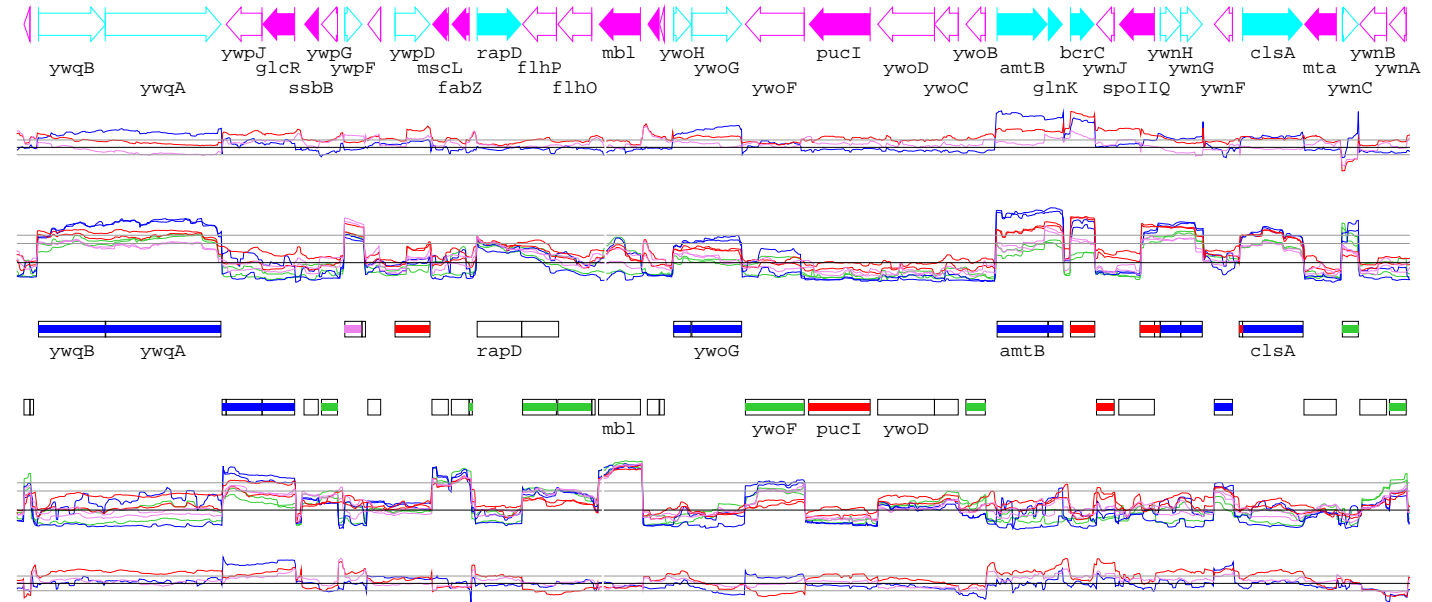

3 766 669

3 800 002

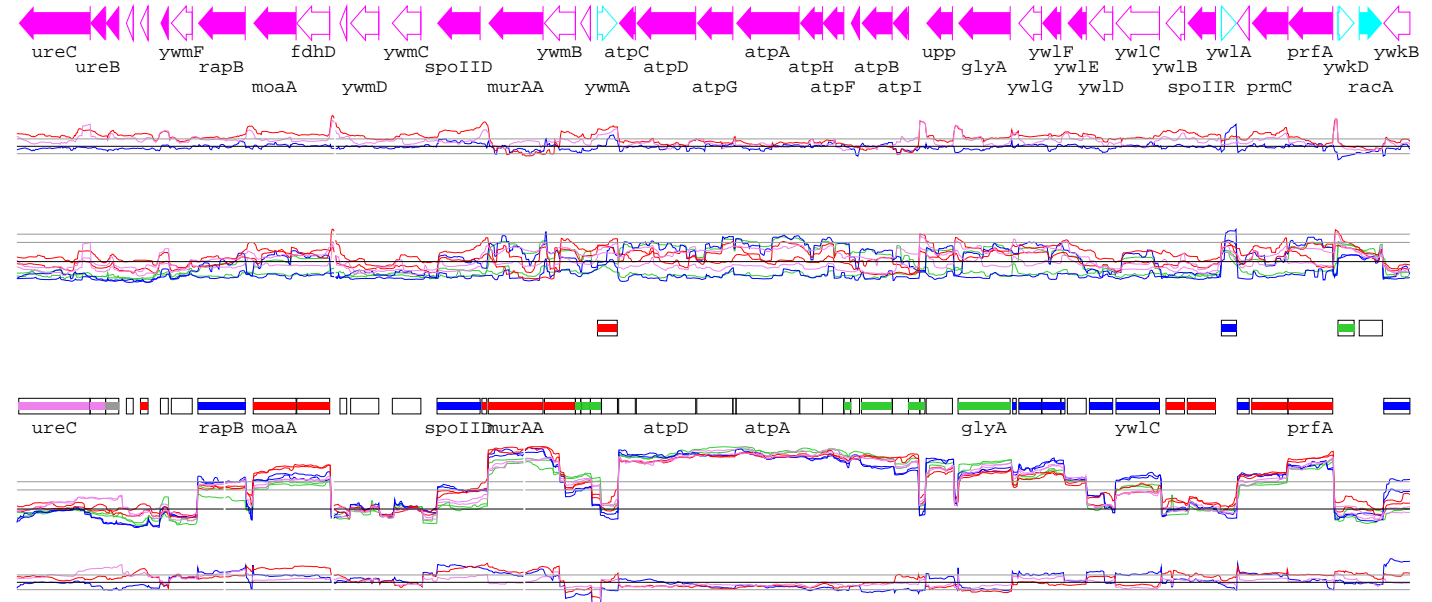

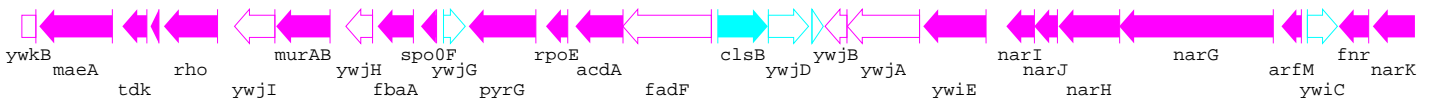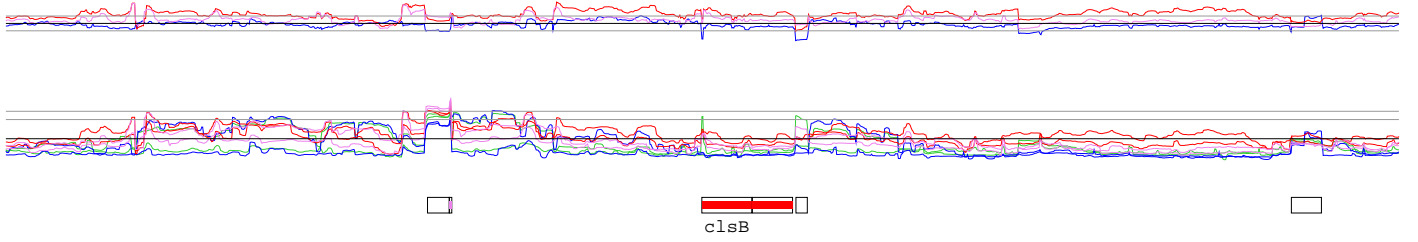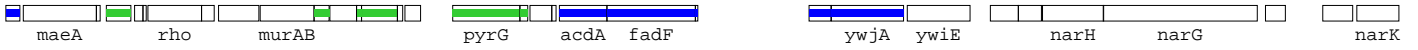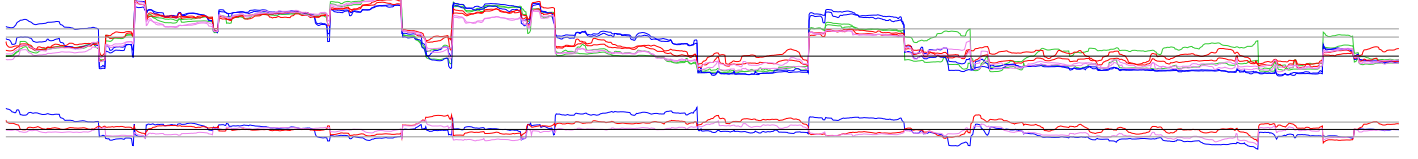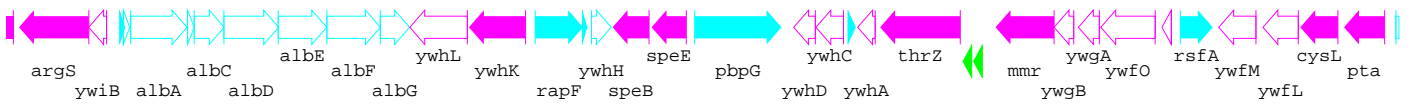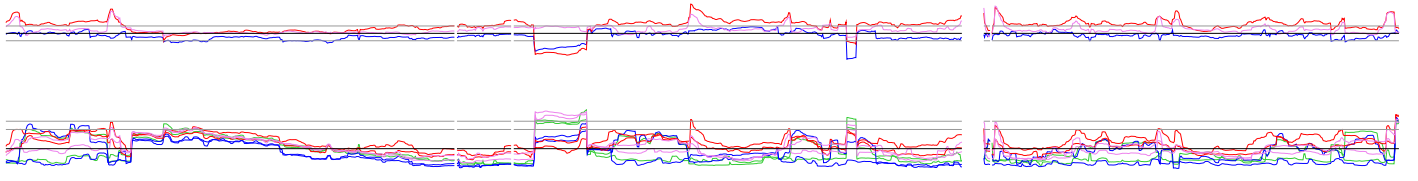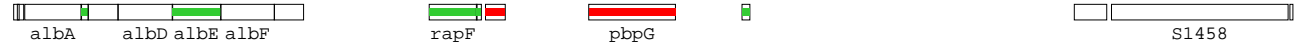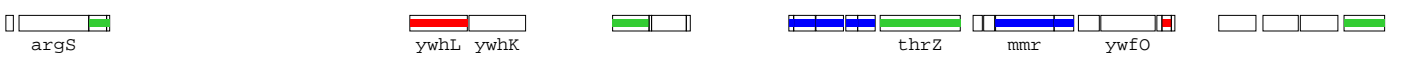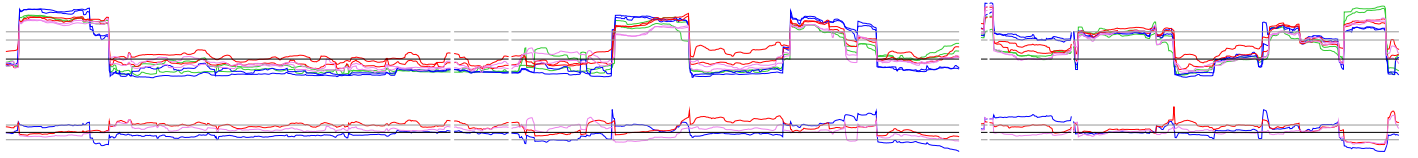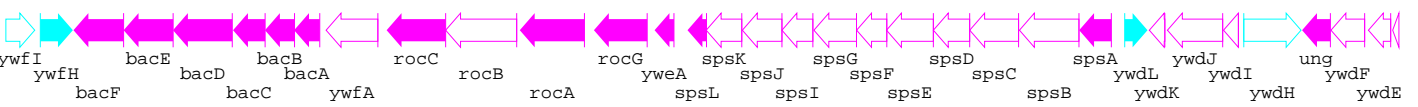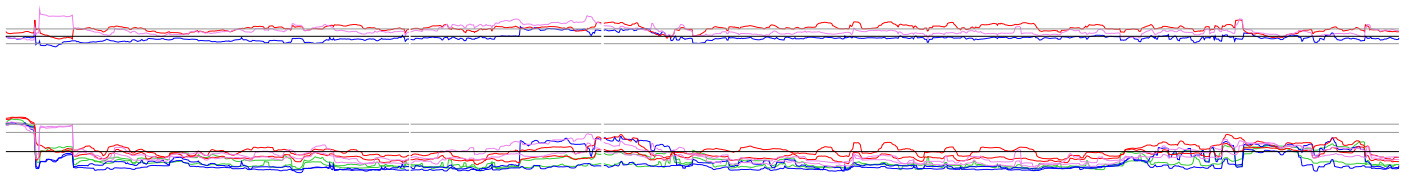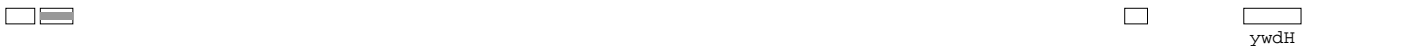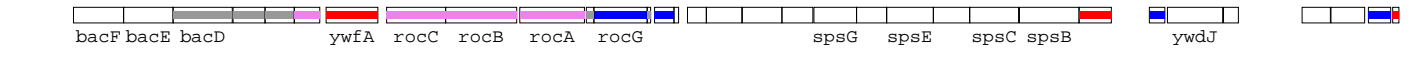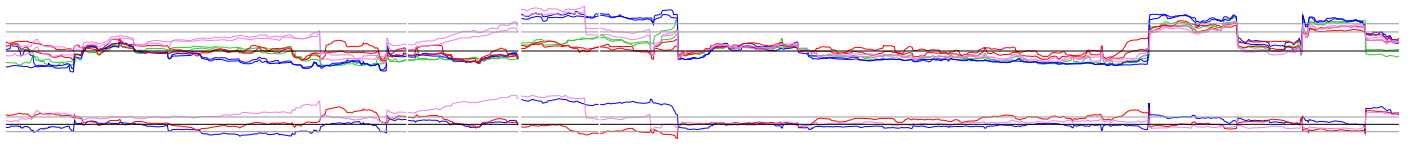

3 900 001

3 933 334

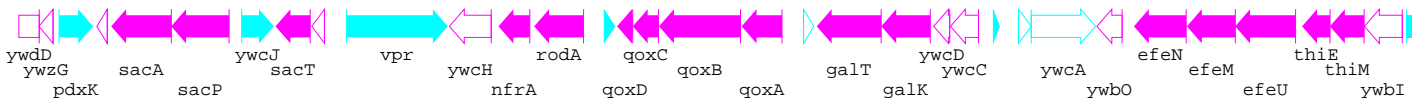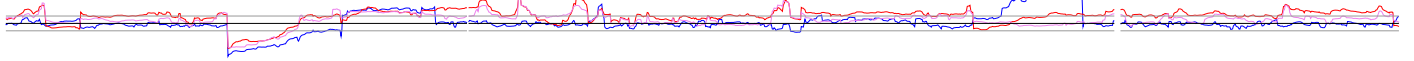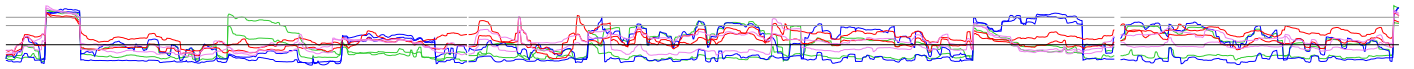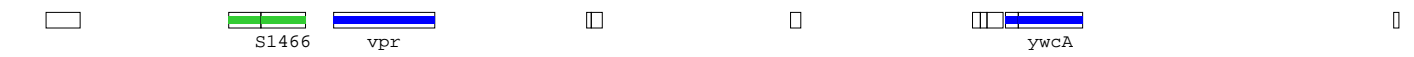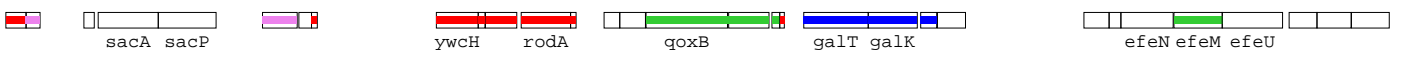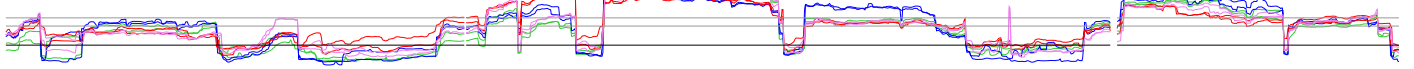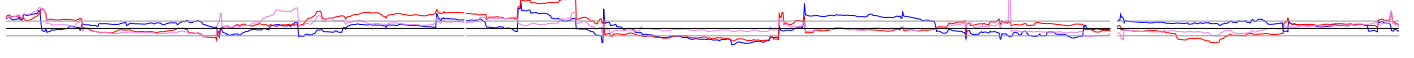

3 933 335

3 966 668

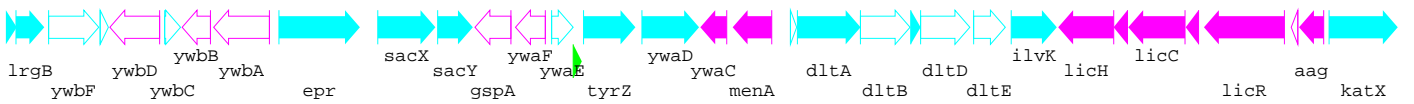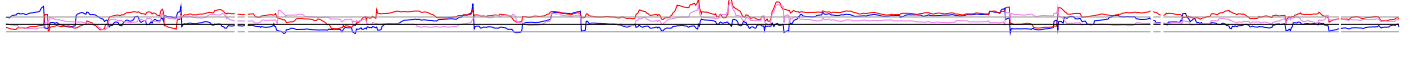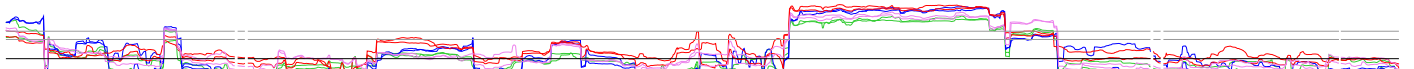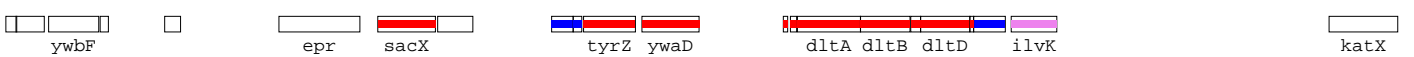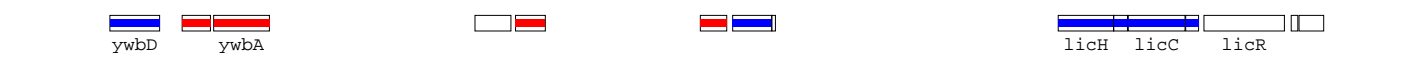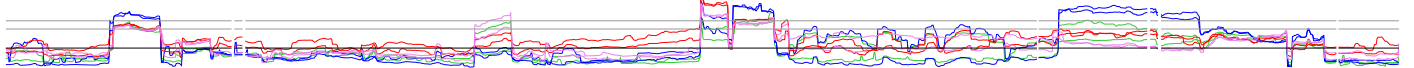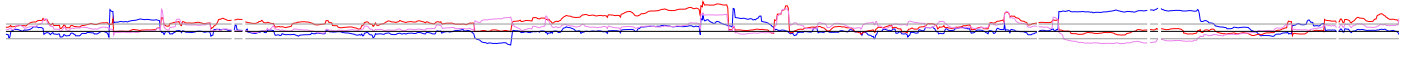

3 966 669

4 000 002

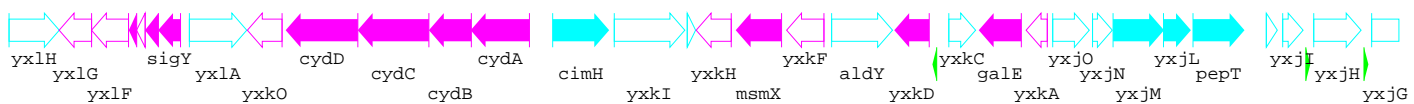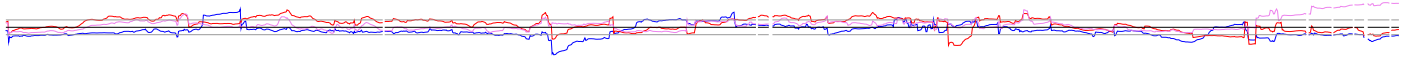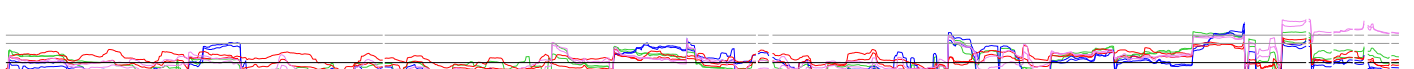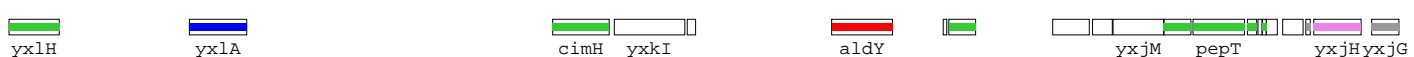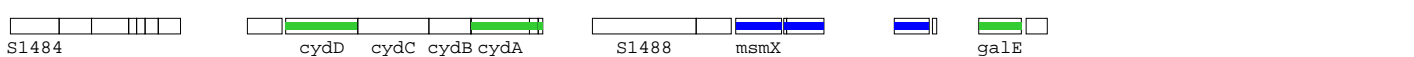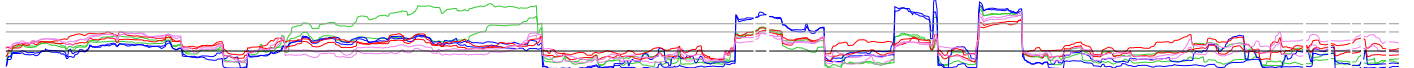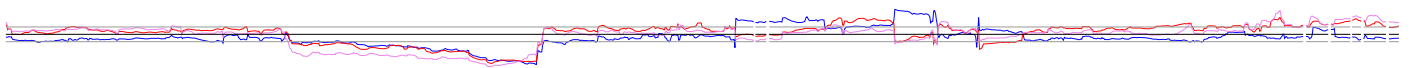



4 000 001

4 033 334

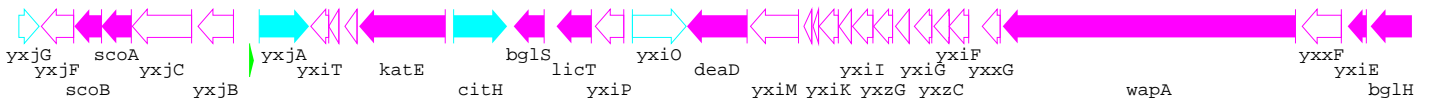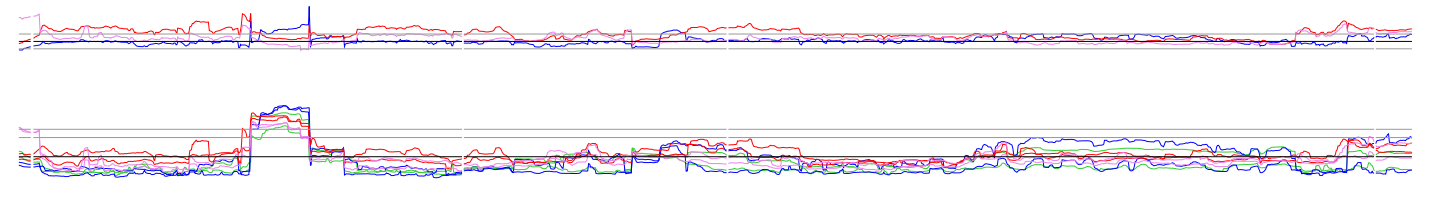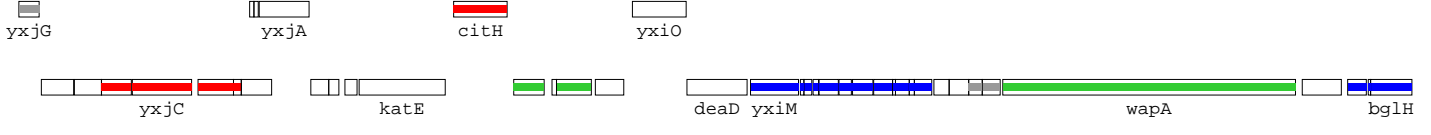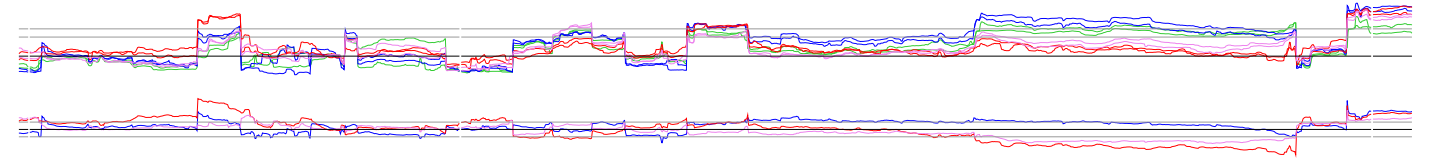

4 033 335

4 066 668

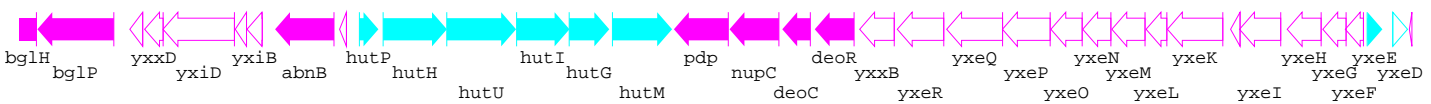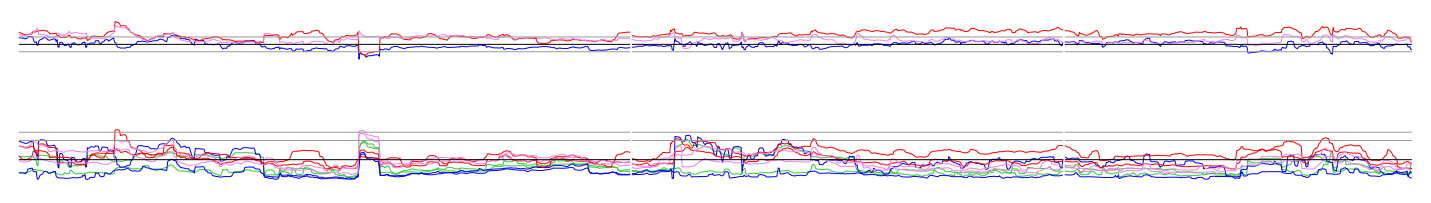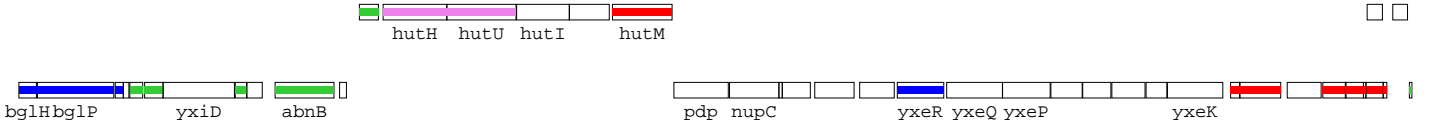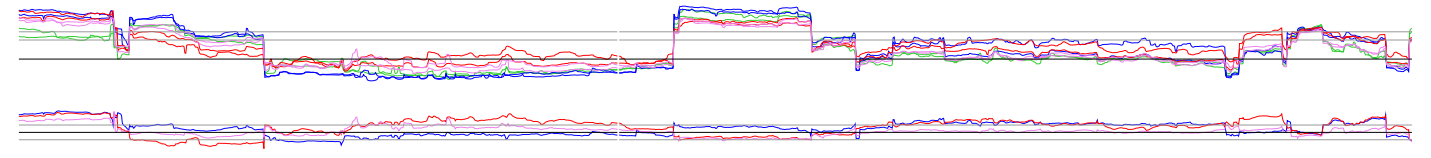

4 066 669

4 100 002

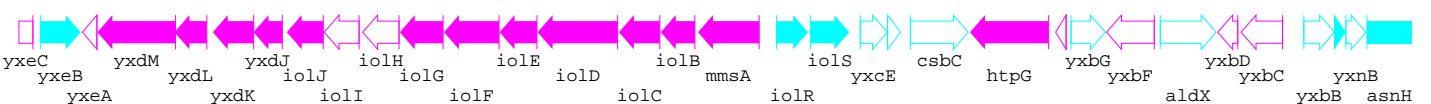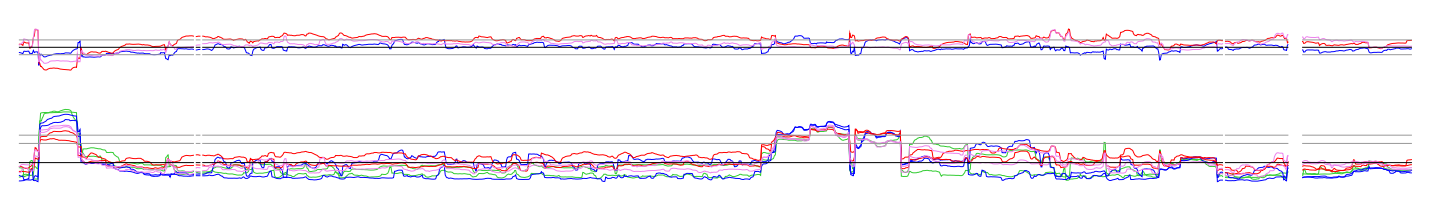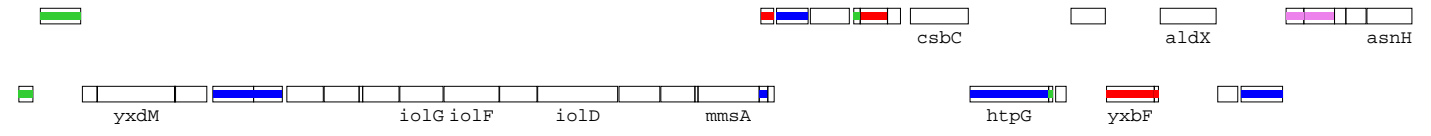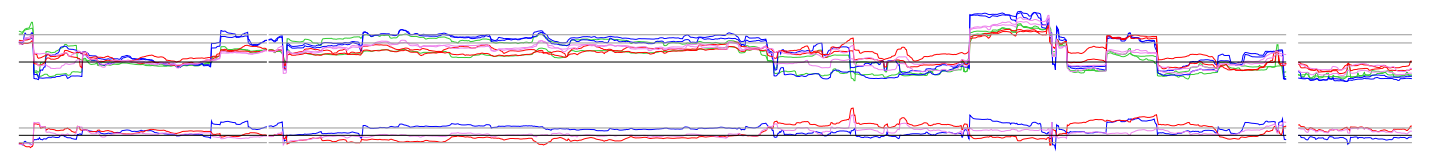

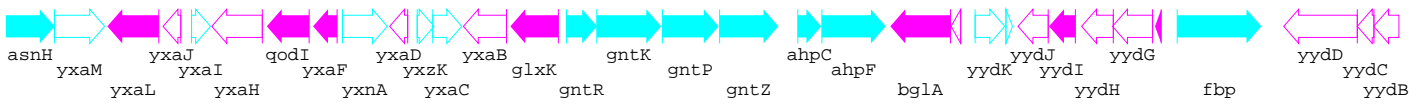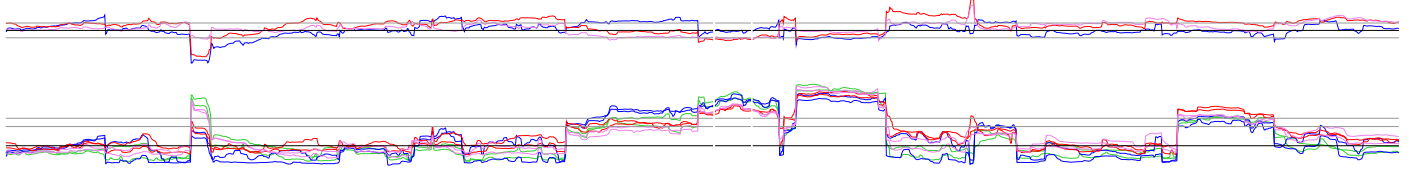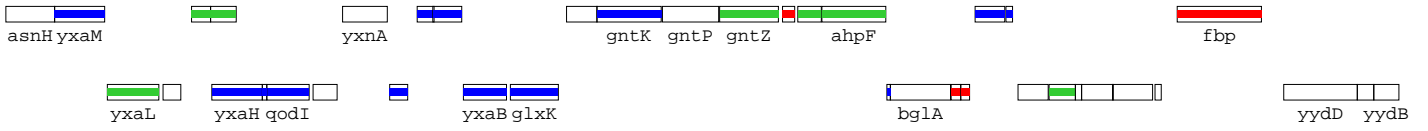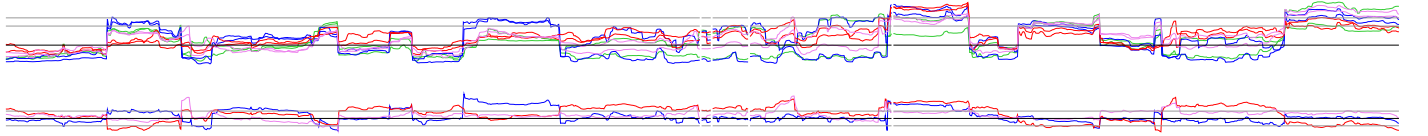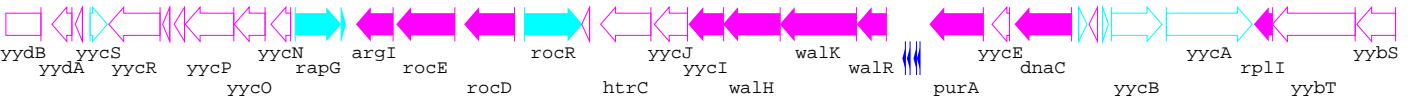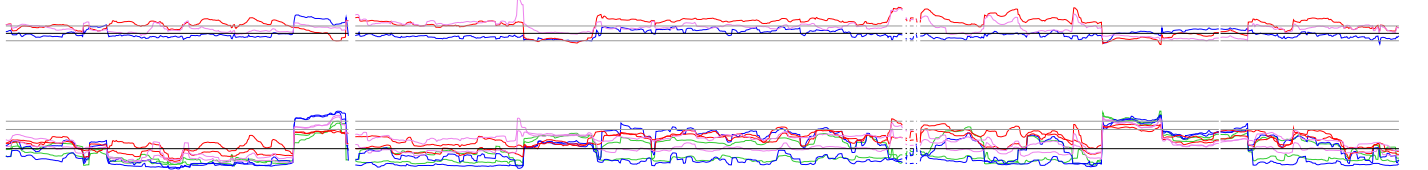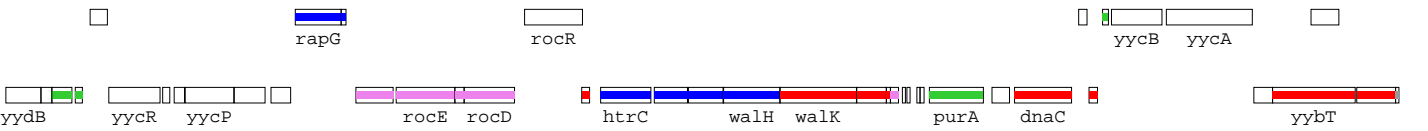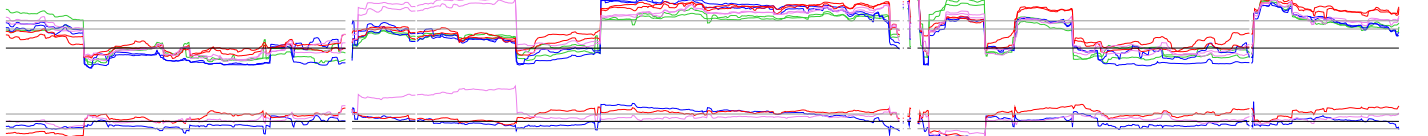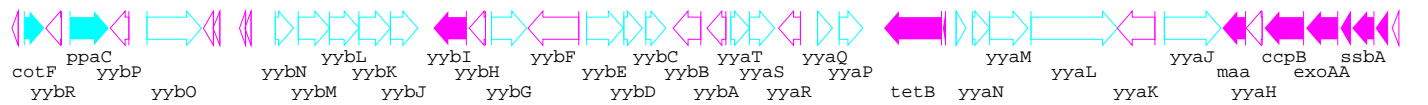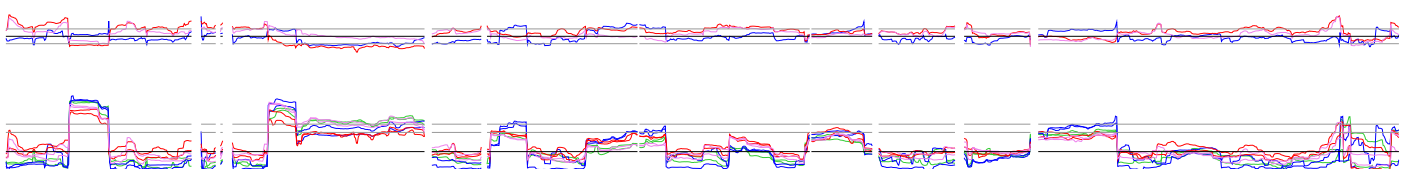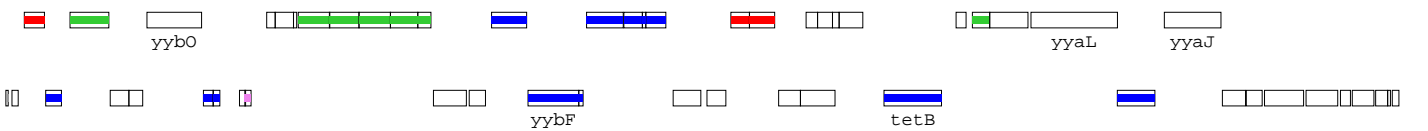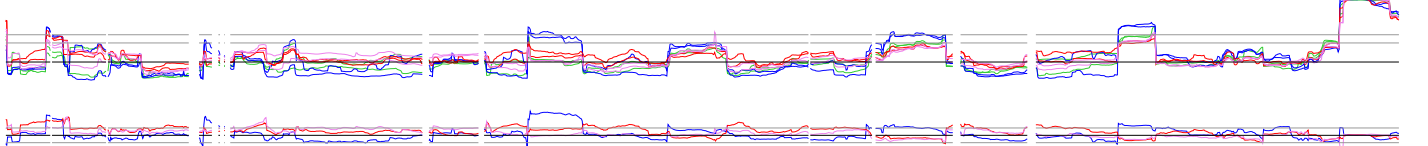

4 200 001

4 233 334

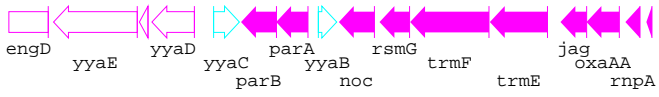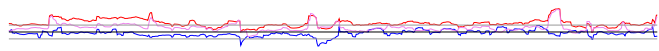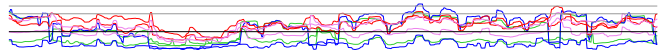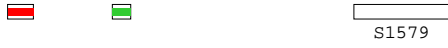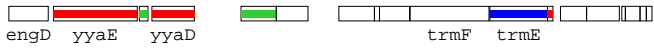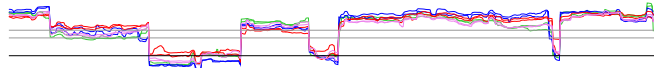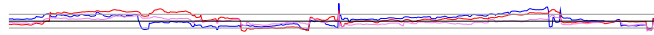

4 233 335

4 266 668

4 266 669

4 300 002
