# Supplementary material for: Three Essential Ribonucleases—RNase Y, J1, and III—Control the Abundance of a Majority of Bacillus subtilis mRNAs
Source: PLoS Genet. 2012 Mar 8;8(3):e1002520. doi: 10.1371/journal.pgen.1002520 (PMC3297567; doi:10.1371/journal.pgen.1002520)
Supplement: Table S7 — Functional categories of genes showing altered expression in RNase mutants. Functional categories are from Subtiwiki v20110601, level 3 (http://subtiwiki.uni-goettingen.de/wiki/index.php/Categories). The percentage of genes in each functional category showing significantly increased abundance (%Up), not significantly changed (%-), or significantly decreased abundance (%Down) is shown for each RNase. The p-value of the Fisher exact test for rejecting the null hypothesis of a distribution similar to that of the whole gene set is provided for each enzyme. Significant p-values (0.05 level after Bonferroni correction for multiple testing) compared to the expected distribution for the null hypothesis are highlighted in the columns labeled ‘summary’. The “+Up” and “−Up” codes refer to over- and under-representation of up-regulated genes, while “+Down” and “−Down”, refer to over- and under-representation of down-regulated genes, respectively. Over-represented categories are highlighted in green; under-represented categories in orange; reference values for the whole geneome in yellow. (XLSX) [file pgen.1002520.s016.xlsx]

## Sheet: statssubtiwkilevel3.csv
Functional Category	Number genes	RNase III %Up	RNase III %-	RNase III %Down	RNase III Pval	RNase III Summary		RNase J1 %Up	RNase J1 %-	RNase J1 %Down	RNase J1 Pval	RNase J1 Summary		RNase Y %Up	RNase Y %-	RNase Y %D	RNase Y Pval	RNase Y Summary
Reference for whole genome	4234	9.75437	88.8994	1.34624	1	.		20.6897	70.2173	9.09306	1	.		18.7766	73.9254	7.29806	1	.
Cellular processes * cell envelope and cell division * capsule biosynthesis and degradation	5	20	80	0	0.444907	.		0	100	0	0.748436	.		0	100	0	0.719487	.
Cellular processes * cell envelope and cell division * capsule biosynthesis and degradation/ based on similarity	2	0	100	0	1	.		0	100	0	1	.		0	100	0	1	.
Cellular processes * cell envelope and cell division * cell division	24	20.8333	79.1667	0	0.165291	.		41.6667	54.1667	4.16667	0.0468785	.		45.8333	50	4.16667	0.00654915	.
Cellular processes * cell envelope and cell division * cell division/ based on similarity	1	100	0	0	0.111006	.		0	100	0	1	.		0	100	0	1	.
Cellular processes * cell envelope and cell division * cell shape	8	0	100	0	1	.		37.5	62.5	0	0.478714	.		62.5	37.5	0	0.0196011	.
Cellular processes * cell envelope and cell division * cell wall degradation/ turnover	38	7.89474	92.1053	0	1	.		13.1579	52.6316	34.2105	4.91113e-05	+Down		10.5263	76.3158	13.1579	0.18943	.
Cellular processes * cell envelope and cell division * cell wall/ other	18	5.55556	88.8889	5.55556	0.290988	.		50	50	0	0.0112638	.		38.8889	44.4444	16.6667	0.0129794	.
Cellular processes * cell envelope and cell division * cell wall/ other/ based on similarity	8	0	100	0	1	.		12.5	75	12.5	0.717044	.		12.5	87.5	0	1	.
Cellular processes * cell envelope and cell division * cell wall synthesis	74	6.75676	93.2432	0	0.540608	.		28.3784	68.9189	2.7027	0.0541891	.		51.3514	44.5946	4.05405	9.70191e-10	+Up
Cellular processes * cell envelope and cell division * membrane dynamics	2	0	100	0	1	.		0	50	50	0.21638	.		0	50	50	0.175871	.
Cellular processes * homeostasis * acquisition of iron	39	0	79.4872	20.5128	7.98759e-09	+Down		17.9487	66.6667	15.3846	0.366565	.		7.69231	66.6667	25.641	0.000396073	.
Cellular processes * homeostasis * acquisition of iron/ based on similarity	4	0	100	0	1	.		50	50	0	0.47042	.		0	75	25	0.397924	.
Cellular processes * homeostasis * metal ion homeostasis (K, Na, Ca, Mg)	26	42.3077	57.6923	0	4.51154e-05	+Up		30.7692	69.2308	0	0.162914	.		38.4615	61.5385	0	0.0279029	.
Cellular processes * homeostasis * pH homeostasis	1	0	100	0	1	.		0	100	0	1	.		0	100	0	1	.
Cellular processes * homeostasis * trace metal homeostasis (Cu, Zn, Ni, Mn, Mo)	24	12.5	87.5	0	0.802446	.		16.6667	66.6667	16.6667	0.436476	.		12.5	66.6667	20.8333	0.0601787	.
Cellular processes * transporters * ABC transporters	211	15.6398	79.1469	5.21327	2.4526e-06	+Down		29.3839	59.7156	10.9005	0.00236965	.		15.6398	68.2464	16.1137	3.10311e-05	+Down
Cellular processes * transporters * phosphotransferase systems	28	3.57143	96.4286	0	0.670311	.		28.5714	53.5714	17.8571	0.0853775	.		14.2857	75	10.7143	0.634968	.
Cellular processes * transporters * transporters/ other	195	13.3333	83.5897	3.07692	0.0200166	.		33.3333	57.9487	8.71795	9.62835e-05	+Up		25.1282	70.2564	4.61538	0.0383528	.
Groups of genes * essential genes * NA	258	2.71318	96.124	1.16279	4.24199e-05	-Up		15.1163	82.1705	2.71318	2.98831e-06	-Down		15.1163	81.3953	3.48837	0.00668095	.
Groups of genes * GTP-binding proteins * NA	11	0	100	0	0.668847	.		27.2727	72.7273	0	0.698505	.		0	100	0	0.205875	.
Groups of genes * membrane proteins * NA	1073	10.6244	87.1389	2.23672	0.00904096	.		28.5182	61.4166	10.0652	2.97535e-13	+Up		21.4352	68.5927	9.97204	5.48288e-06	+Down
Groups of genes * ncRNA * NA	1	0	100	0	1	.		0	100	0	1	.		0	100	0	1	.
Groups of genes * phosphoproteins * NA	208	7.21154	90.3846	2.40385	0.173088	.		22.5962	62.9808	14.4231	0.0155822	.		11.5385	75.9615	12.5	0.000895851	.
Groups of genes * poorly characterized/ putative enzymes * NA	213	11.7371	85.9155	2.34742	0.207531	.		19.2488	70.4225	10.3286	0.705531	.		20.1878	75.5869	4.22535	0.192994	.
Groups of genes * proteins of unknown function * NA	1035	10.2415	89.2754	0.483092	0.0112952	.		20.9662	70.2415	8.79227	0.913718	.		17.8744	75.7488	6.37681	0.25339	.
Groups of genes * pseudogenes * NA	42	4.7619	95.2381	0	0.678886	.		16.6667	83.3333	0	0.0462728	.		16.6667	83.3333	0	0.13838	.
Groups of genes * short peptides * NA	10	0	100	0	0.66135	.		20	60	20	0.411325	.		0	70	30	0.0196403	.
Groups of genes * universally conserved proteins * NA	30	0	100	0	0.160825	.		0	96.6667	3.33333	0.00153832	.		3.33333	93.3333	3.33333	0.035073	.
Information processing * genetics * DNA condensation/ segregation	17	0	100	0	0.525652	.		29.4118	70.5882	0	0.407474	.		29.4118	64.7059	5.88235	0.471038	.
Information processing * genetics * DNA repair/ recombination	53	9.43396	90.566	0	1	.		33.9623	62.2642	3.77358	0.0466043	.		24.5283	75.4717	0	0.050201	.
Information processing * genetics * DNA repair/ recombination/ based on similarity	16	0	100	0	0.512451	.		37.5	56.25	6.25	0.231881	.		37.5	56.25	6.25	0.136862	.
Information processing * genetics * DNA replication	24	0	100	0	0.3297	.		12.5	79.1667	8.33333	0.628341	.		29.1667	70.8333	0	0.232817	.
Information processing * genetics * DNA replication/ based on similarity	4	0	100	0	1	.		50	50	0	0.47042	.		25	75	0	1	.
Information processing * genetics * DNA restriction/ modification	6	0	100	0	1	.		16.6667	83.3333	0	1	.		33.3333	66.6667	0	0.588168	.
Information processing * genetics * DNA restriction/ modification/ based on similarity	1	0	100	0	1	.		100	0	0	0.297827	.		0	100	0	1	.
Information processing * genetics * genetic competence	52	13.4615	86.5385	0	0.551121	.		15.3846	61.5385	23.0769	0.00593521	.		15.3846	63.4615	21.1538	0.00345927	.
Information processing * genetics * genetics/ other/ based on similarity	8	12.5	87.5	0	0.61021	.		12.5	75	12.5	0.717044	.		12.5	75	12.5	0.657563	.
Information processing * protein synthesis, modification and degradation * chaperone/ protein folding/ based on similarity	5	40	60	0	0.140049	.		80	20	0	0.0148297	.		40	60	0	0.498887	.
Information processing * protein synthesis, modification and degradation * chaperones/ protein folding	12	0	100	0	0.678863	.		8.33333	75	16.6667	0.292119	.		0	83.3333	16.6667	0.117735	.
Information processing * protein synthesis, modification and degradation * protein modification	90	6.66667	93.3333	0	0.434713	.		27.7778	63.3333	8.88889	0.240856	.		10	82.2222	7.77778	0.0835826	.
Information processing * protein synthesis, modification and degradation * protein secretion	36	2.77778	91.6667	5.55556	0.0397297	.		27.7778	66.6667	5.55556	0.539049	.		27.7778	63.8889	8.33333	0.324057	.
Information processing * protein synthesis, modification and degradation * protein secretion/ based on similarity	1	0	100	0	1	.		0	0	100	0.0909306	.		0	0	100	0.0729806	.
Information processing * protein synthesis, modification and degradation * proteolysis	29	20.6897	79.3103	0	0.14904	.		34.4828	65.5172	0	0.0568217	.		31.0345	68.9655	0	0.116497	.
Information processing * protein synthesis, modification and degradation * proteolysis/ based on similarity	1	0	100	0	1	.		100	0	0	0.297827	.		100	0	0	0.260746	.
Information processing * protein synthesis, modification and degradation * translation	177	3.38983	95.4802	1.12994	0.00572966	.		10.1695	85.8757	3.9548	6.97441e-06	-Down		6.77966	89.8305	3.38983	7.47826e-07	-Up
Information processing * regulation of gene expression * phosphorelay	39	15.3846	84.6154	0	0.439777	.		25.641	53.8462	20.5128	0.0242993	.		10.2564	69.2308	20.5128	0.0104818	.
Information processing * regulation of gene expression * quorum sensing	22	9.09091	90.9091	0	1	.		18.1818	68.1818	13.6364	0.645265	.		0	77.2727	22.7273	0.00284151	.
Information processing * regulation of gene expression * regulators of core metabolism	8	0	100	0	1	.		37.5	37.5	25	0.0588489	.		12.5	87.5	0	1	.
Information processing * regulation of gene expression * RNA binding regulators	11	18.1818	81.8182	0	0.395206	.		18.1818	72.7273	9.09091	1	.		0	81.8182	18.1818	0.109163	.
Information processing * regulation of gene expression * sigma factors and their control	67	7.46269	92.5373	0	0.751977	.		23.8806	71.6418	4.47761	0.388253	.		22.3881	76.1194	1.49254	0.133408	.
Information processing * regulation of gene expression * transcription factors and their control	322	7.76398	91.9255	0.310559	0.104346	.		27.9503	64.9068	7.14286	0.00386327	.		14.5963	80.1242	5.2795	0.0314397	.
Information processing * regulation of gene expression * transition state regulators	8	0	100	0	1	.		12.5	62.5	25	0.219068	.		0	87.5	12.5	0.265636	.
Information processing * regulation of gene expression * trigger enzyme	16	12.5	87.5	0	0.732703	.		25	68.75	6.25	0.915548	.		12.5	81.25	6.25	0.905979	.
Information processing * RNA synthesis and degradation * DEAD-box RNA helicases	4	0	100	0	1	.		0	100	0	0.713369	.		25	75	0	1	.
Information processing * RNA synthesis and degradation * RNA chaperones	5	0	100	0	1	.		20	60	20	0.429684	.		0	100	0	0.719487	.
Information processing * RNA synthesis and degradation * RNase/ based on similarity	1	0	100	0	1	.		100	0	0	0.297827	.		0	100	0	1	.
Information processing * RNA synthesis and degradation * RNases	20	0	95	5	0.11218	.		10	80	10	0.539376	.		5	85	10	0.199514	.
Information processing * RNA synthesis and degradation * transcription	33	6.06061	93.9394	0	0.851321	.		9.09091	84.8485	6.06061	0.204293	.		15.1515	81.8182	3.0303	0.648707	.
Lifestyles * coping with stress * acid stress proteins (controlled by YvrI-YvrHa)	5	20	80	0	0.444907	.		0	80	20	0.299243	.		0	100	0	0.719487	.
Lifestyles * coping with stress * biosynthesis of antibacterial compounds	52	11.5385	88.4615	0	0.822541	.		7.69231	78.8462	13.4615	0.0342524	.		0	94.2308	5.76923	7.2488e-05	-Up
Lifestyles * coping with stress * cell envelope stress proteins (controlled by SigM, W, X, Y)	129	28.6822	71.3178	0	2.26115e-09	+Up		31.0078	66.6667	2.32558	0.000570303	.		41.8605	54.2636	3.87597	3.51884e-09	+Up
Lifestyles * coping with stress * cold stress proteins	16	0	100	0	0.512451	.		12.5	81.25	6.25	0.840875	.		12.5	75	12.5	0.498643	.
Lifestyles * coping with stress * coping with hyper-osmotic stress	22	50	50	0	5.73904e-06	+Up		36.3636	63.6364	0	0.108821	.		40.9091	59.0909	0	0.033696	.
Lifestyles * coping with stress * coping with hypo-osmotic stress	4	0	100	0	1	.		50	50	0	0.47042	.		75	25	0	0.0515552	.
Lifestyles * coping with stress * general stress proteins (controlled by SigB)	151	13.9073	86.0927	0	0.0868826	.		11.9205	86.0927	1.98675	9.3239e-06	-Down		17.8808	80.7947	1.3245	0.00383217	.
Lifestyles * coping with stress * heat shock proteins	27	37.037	62.963	0	0.000464944	.		37.037	62.963	0	0.0463152	.		37.037	62.963	0	0.0356691	.
Lifestyles * coping with stress * resistance against other toxic compounds (nitric oxide, phenolic acids, flavonoids, oxalate)	15	13.3333	86.6667	0	0.718069	.		26.6667	66.6667	6.66667	0.833343	.		26.6667	73.3333	0	0.591204	.
Lifestyles * coping with stress * resistance against oxidative and electrophile stress	55	18.1818	76.3636	5.45455	0.00509409	.		14.5455	74.5455	10.9091	0.514877	.		34.5455	58.1818	7.27273	0.0117778	.
Lifestyles * coping with stress * resistance against oxidative and electrophile stress/ based on similarity	4	0	100	0	1	.		50	50	0	0.47042	.		25	75	0	1	.
Lifestyles * coping with stress * resistance against toxic metals	15	46.6667	53.3333	0	0.000684106	.		26.6667	73.3333	0	0.578638	.		13.3333	86.6667	0	0.730591	.
Lifestyles * coping with stress * resistance against toxic metals/ based on similarity	7	14.2857	85.7143	0	0.561447	.		14.2857	57.1429	28.5714	0.202708	.		0	100	0	0.494601	.
Lifestyles * coping with stress * resistance against toxins/ antibiotics	54	22.2222	77.7778	0	0.0176435	.		50	46.2963	3.7037	5.77687e-06	+Up		11.1111	83.3333	5.55556	0.312749	.
Lifestyles * coping with stress * resistance against toxins/ antibiotics/ based on similarity	45	6.66667	93.3333	0	0.79378	.		46.6667	48.8889	4.44444	0.000365844	.		28.8889	68.8889	2.22222	0.145361	.
Lifestyles * coping with stress * toxins, antitoxins and immunity against toxins	15	13.3333	86.6667	0	0.718069	.		26.6667	73.3333	0	0.578638	.		13.3333	80	6.66667	0.904615	.
Lifestyles * coping with stress * toxins, antitoxins and immunity against toxins/ based on similarity	8	12.5	87.5	0	0.61021	.		12.5	87.5	0	0.856281	.		12.5	62.5	25	0.15476	.
Lifestyles * exponential and early post-exponential lifestyles * biofilm formation	45	2.22222	97.7778	0	0.230796	.		46.6667	53.3333	0	7.07986e-05	+Up		6.66667	86.6667	6.66667	0.0867642	.
Lifestyles * exponential and early post-exponential lifestyles * genetic competence	52	13.4615	86.5385	0	0.551121	.		15.3846	61.5385	23.0769	0.00593521	.		15.3846	63.4615	21.1538	0.00345927	.
Lifestyles * exponential and early post-exponential lifestyles * motility and chemotaxis	67	8.95522	89.5522	1.49254	0.871561	.		5.97015	43.2836	50.7463	1.14039e-18	+Down		8.95522	40.2985	50.7463	2.43148e-21	+Down
Lifestyles * lifestyles/ miscellaneous * NA	9	44.4444	55.5556	0	0.0170585	.		33.3333	55.5556	11.1111	0.439157	.		44.4444	55.5556	0	0.160716	.
Lifestyles * sporulation * germination	33	3.0303	96.9697	0	0.520473	.		9.09091	90.9091	0	0.0241951	.		30.303	69.697	0	0.0860313	.
Lifestyles * sporulation * germination/ based on similarity	5	0	100	0	1	.		0	100	0	0.748436	.		20	80	0	1	.
Lifestyles * sporulation * phosphorelay	39	15.3846	84.6154	0	0.439777	.		25.641	53.8462	20.5128	0.0242993	.		10.2564	69.2308	20.5128	0.0104818	.
Lifestyles * sporulation * sporulation/ other	14	14.2857	85.7143	0	0.703963	.		14.2857	78.5714	7.14286	0.905772	.		21.4286	64.2857	14.2857	0.337812	.
Lifestyles * sporulation * sporulation proteins	348	5.17241	94.8276	0	0.000159459	.		15.2299	83.6207	1.14943	1.75162e-12	-Down		31.8966	67.2414	0.862069	1.18401e-14	-Down
Metabolism * additional metabolic pathways * biosynthesis of cell wall components	56	7.14286	92.8571	0	0.838338	.		30.3571	69.6429	0	0.00755912	.		55.3571	41.0714	3.57143	3.8546e-09	+Up
Metabolism * additional metabolic pathways * biosynthesis of cofactors	108	2.77778	97.2222	0	0.0134664	.		20.3704	77.7778	1.85185	0.0106615	.		22.2222	72.2222	5.55556	0.565302	.
Metabolism * additional metabolic pathways * iron metabolism	50	0	84	16	2.74466e-08	+Down		18	70	12	0.656985	.		6	72	22	0.000278166	.
Metabolism * additional metabolic pathways * miscellaneous metabolic pathways	74	10.8108	87.8378	1.35135	0.828354	.		10.8108	79.7297	9.45946	0.0859043	.		8.10811	87.8378	4.05405	0.0199213	.
Metabolism * additional metabolic pathways * phosphate metabolism	19	10.5263	89.4737	0	0.777149	.		47.3684	47.3684	5.26316	0.0262322	.		15.7895	78.9474	5.26316	1	.
Metabolism * additional metabolic pathways * sulfur metabolism	15	6.66667	93.3333	0	1	.		13.3333	73.3333	13.3333	0.695937	.		20	73.3333	6.66667	1	.
Metabolism * amino acid/ nitrogen metabolism * biosynthesis/ acquisition of amino acids	145	26.2069	73.7931	0	1.71906e-08	+Up		9.65517	75.1724	15.1724	0.00025511	.		16.5517	68.9655	14.4828	0.00755475	.
Metabolism * amino acid/ nitrogen metabolism * putative amino acid transporter	5	20	80	0	0.444907	.		20	60	20	0.429684	.		0	100	0	0.719487	.
Metabolism * amino acid/ nitrogen metabolism * utilization of amino acids	70	22.8571	77.1429	0	0.00353667	.		20	72.8571	7.14286	0.905447	.		20	72.8571	7.14286	0.933846	.
Metabolism * amino acid/ nitrogen metabolism * utilization of nitrogen sources other than amino acids	43	39.5349	60.4651	0	8.33095e-07	+Up		16.2791	62.7907	20.9302	0.0424782	.		25.5814	58.1395	16.2791	0.0245208	.
Metabolism * carbon metabolism * carbon core metabolism	54	5.55556	88.8889	5.55556	0.037512	.		11.1111	59.2593	29.6296	2.90851e-05	+Down		5.55556	74.0741	20.3704	0.000329216	.
Metabolism * carbon metabolism * utilization of specific carbon sources	236	5.50847	92.7966	1.69492	0.0478774	.		28.8136	63.1356	8.05085	0.00898139	.		11.0169	80.0847	8.89831	0.00353292	.
Metabolism * electron transport and ATP synthesis * ATP synthesis	14	0	100	0	0.492666	.		0	64.2857	35.7143	0.00354267	.		0	85.7143	14.2857	0.0864452	.
Metabolism * electron transport and ATP synthesis * electron transport/ other	18	22.2222	77.7778	0	0.175578	.		22.2222	72.2222	5.55556	1	.		38.8889	61.1111	0	0.0907861	.
Metabolism * electron transport and ATP synthesis * electron transport/ other/ based on similarity	23	21.7391	78.2609	0	0.150298	.		21.7391	65.2174	13.0435	0.615818	.		21.7391	69.5652	8.69565	0.706369	.
Metabolism * electron transport and ATP synthesis * regulators of electron transport	5	0	100	0	1	.		0	100	0	0.748436	.		20	80	0	1	.
Metabolism * electron transport and ATP synthesis * respiration	37	5.40541	86.4865	8.10811	0.0172032	.		21.6216	64.8649	13.5135	0.526785	.		8.10811	72.973	18.9189	0.0156701	.
Metabolism * lipid metabolism * biosynthesis of lipids	44	2.27273	95.4545	2.27273	0.138884	.		22.7273	72.7273	4.54545	0.621154	.		18.1818	79.5455	2.27273	0.521618	.
Metabolism * lipid metabolism * lipid metabolism/ other	12	8.33333	91.6667	0	1	.		41.6667	58.3333	0	0.245228	.		58.3333	41.6667	0	0.00831187	.
Metabolism * lipid metabolism * utilization of lipids	32	12.5	78.125	9.375	0.00748045	.		37.5	53.125	9.375	0.0555328	.		15.625	71.875	12.5	0.468668	.
Metabolism * nucleotide metabolism * biosynthesis/ acquisition of nucleotides	61	1.63934	80.3279	18.0328	7.96875e-11	+Down		9.83607	62.2951	27.8689	2.27701e-05	+Down		8.19672	65.5738	26.2295	4.61563e-06	+Down
Metabolism * nucleotide metabolism * metabolism of signalling nucleotides	11	18.1818	81.8182	0	0.395206	.		27.2727	63.6364	9.09091	0.788194	.		45.4545	54.5455	0	0.0898806	.
Metabolism * nucleotide metabolism * nucleotide metabolism/ other	5	0	100	0	1	.		20	80	0	1	.		0	100	0	0.719487	.
Metabolism * nucleotide metabolism * utilization of nucleotides	21	0	100	0	0.442723	.		66.6667	33.3333	0	2.15464e-05	+Up		47.619	52.381	0	0.00642105	.
Prophages and mobile genetic elements * mobile genetic elements/ based on similarity * NA	3	0	100	0	1	.		0	100	0	1	.		0	100	0	1	.
Prophages and mobile genetic elements * mobile genetic elements * NA	10	0	100	0	0.66135	.		0	100	0	0.154767	.		0	100	0	0.350239	.
Prophages and mobile genetic elements * prophages * PBSX prophage	38	13.1579	86.8421	0	0.653487	.		0	18.4211	81.5789	7.8967e-27	+Down		92.1053	7.89474	0	5.63689e-22	+Up
Prophages and mobile genetic elements * prophages * phage-related functions	2	0	100	0	1	.		0	0	100	0.00824884	.		0	50	50	0.175871	.
Prophages and mobile genetic elements * prophages * Skin element	63	9.52381	90.4762	0	1	.		7.93651	87.3016	4.7619	0.00833909	.		11.1111	88.8889	0	0.00658369	.
Prophages and mobile genetic elements * prophages * SP-beta prophage	186	3.76344	94.6237	1.6129	0.00807343	.		6.45161	88.7097	4.83871	4.99681e-09	-Up		6.45161	83.3333	10.2151	4.25925e-06	-Up
